# Supplementary material for: Cost-effectiveness analysis of ixekizumab versus secukinumab in patients with psoriatic arthritis and concomitant moderate-to-severe psoriasis in Spain
Source: PubMed Central journal article supplement — BMJ Open. 2020 Aug 13;10(8):e032552. doi: 10.1136/bmjopen-2019-032552 (PMC7430486; doi:10.1136/bmjopen-2019-032552), 2020-08-13
Supplement: bmjopen-2019-032552.draft_revisions.pdf [file bmjopen-2019-032552.draft_revisions.pdf]

# BMJ Open

BMJ Open is committed to open peer review. As part of this commitment we make the peer review history of every article we publish publicly available.

When an article is published we post the peer reviewers' comments and the authors' responses online. We also post the versions of the paper that were used during peer review. These are the versions that the peer review comments apply to.

The versions of the paper that follow are the versions that were submitted during the peer review process. They are not the versions of record or the final published versions. They should not be cited or distributed as the published version of this manuscript.

BMJ Open is an open access journal and the full, final, typeset and author-corrected version of record of the manuscript is available on our site with no access controls, subscription charges or pay-per-view fees (<http://bmjopen.bmj.com>).

If you have any questions on BMJ Open's open peer review process please email [info.bmjopen@bmj.com](mailto:info.bmjopen@bmj.com)

# BMJ Open

## Cost-effectiveness analysis of ixekizumab versus secukinumab in patients with psoriatic arthritis and concomitant moderate-to-severe psoriasis in Spain

|                               |                                                                                                                                                                                                                                                                                                                                                                                                                                                                                                                                            |
|-------------------------------|--------------------------------------------------------------------------------------------------------------------------------------------------------------------------------------------------------------------------------------------------------------------------------------------------------------------------------------------------------------------------------------------------------------------------------------------------------------------------------------------------------------------------------------------|
| Journal:                      | <i>BMJ Open</i>                                                                                                                                                                                                                                                                                                                                                                                                                                                                                                                            |
| Manuscript ID                 | bmjopen-2019-032552                                                                                                                                                                                                                                                                                                                                                                                                                                                                                                                        |
| Article Type:                 | Original research                                                                                                                                                                                                                                                                                                                                                                                                                                                                                                                          |
| Date Submitted by the Author: | 03-Jul-2019                                                                                                                                                                                                                                                                                                                                                                                                                                                                                                                                |
| Complete List of Authors:     | Schweikert, Bernd; ICON, Real World Evidence Strategy & Analytics, Commercialisation & Outcomes<br>Malmberg, Chiara; ICON, Access, Commercialisation & Communications<br>Núñez, Mercedes; Eli Lilly and Company, Spain, Health Outcomes & Real World Evidence<br>Dilla, Tatiana; Eli Lilly and Company, Global Patient Outcomes & Real World Evidence International<br>Sapin, Christophe; Eli Lilly and Company, European Statistics<br>Hartz, Susanne; Eli Lilly and Company, Global Patient Outcomes & Real World Evidence International |
| Keywords:                     | Ixekizumab, Secukinumab, Cost-effectiveness analysis, Spanish population, Psoriatic arthritis, Biologics                                                                                                                                                                                                                                                                                                                                                                                                                                   |
|                               |                                                                                                                                                                                                                                                                                                                                                                                                                                                                                                                                            |

SCHOLARONE™  
Manuscripts

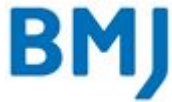

I, the Submitting Author has the right to grant and does grant on behalf of all authors of the Work (as defined in the below author licence), an exclusive licence and/or a non-exclusive licence for contributions from authors who are: i) UK Crown employees; ii) where BMJ has agreed a CC-BY licence shall apply, and/or iii) in accordance with the terms applicable for US Federal Government officers or employees acting as part of their official duties; on a worldwide, perpetual, irrevocable, royalty-free basis to BMJ Publishing Group Ltd ("BMJ") its licensees and where the relevant Journal is co-owned by BMJ to the co-owners of the Journal, to publish the Work in this journal and any other BMJ products and to exploit all rights, as set out in our [licence](#).

The Submitting Author accepts and understands that any supply made under these terms is made by BMJ to the Submitting Author unless you are acting as an employee on behalf of your employer or a postgraduate student of an affiliated institution which is paying any applicable article publishing charge ("APC") for Open Access articles. Where the Submitting Author wishes to make the Work available on an Open Access basis (and intends to pay the relevant APC), the terms of reuse of such Open Access shall be governed by a Creative Commons licence – details of these licences and which [Creative Commons](#) licence will apply to this Work are set out in our licence referred to above.

Other than as permitted in any relevant BMJ Author's Self Archiving Policies, I confirm this Work has not been accepted for publication elsewhere, is not being considered for publication elsewhere and does not duplicate material already published. I confirm all authors consent to publication of this Work and authorise the granting of this licence.

1  
2  
3  
4  
5  
6  
7  
8  
9  
10  
11  
12  
13  
14  
15  
16  
17  
18  
19  
20  
21  
22  
23  
24  
25  
26  
27  
28  
29  
30  
31  
32  
33  
34  
35  
36  
37  
38  
39  
40  
41  
42  
43  
44  
45  
46  
47  
48  
49  
50  
51  
52  
53  
54  
55  
56  
57  
58  
59  
60

## **Cost-effectiveness analysis of ixekizumab versus secukinumab in patients with psoriatic arthritis and concomitant moderate-to-severe psoriasis in Spain**

**Bernd Schweikert<sup>1</sup>, Chiara Malmberg<sup>2</sup>, Mercedes Nuñez<sup>3</sup>, Tatiana Dilla<sup>4</sup>,  
Christophe Sapin<sup>5</sup>, Susanne Hartz<sup>6</sup>**

**<sup>1</sup>ICON, Real World Evidence Strategy & Analytics, Commercialisation & Outcomes, Munich, Germany; <sup>2</sup>ICON, Access, Commercialisation & Communications, Munich, Germany; <sup>3</sup>Eli Lilly and Company, Health Outcomes & Real World Evidence, Madrid, Spain; <sup>4</sup>Eli Lilly and Company, Global Patient Outcomes & Real World Evidence International, Madrid, Spain; <sup>5</sup>Eli Lilly and Company, European Statistics, Neuilly-sur-Seine, France; <sup>6</sup>Eli Lilly and Company, Global Patient Outcomes & Real World Evidence International, Windlesham, UK**

Corresponding Author: Bernd Schweikert

Address: ICON, Konrad-Zuse-Platz 11, 81829 Munich, Germany

Phone: +49(0)89.66610.5105

Email: Bernd.Schweikert@iconplc.com

ORCID number: 0000-0001-8253-509X

Running header: Cost-effectiveness of ixekizumab in psoriatic arthritis

Key words: Ixekizumab, Secukinumab, Cost-effectiveness analysis, Spanish population, Psoriatic arthritis, Biologics

## ABSTRACT

**Objective:** Biologic disease-modifying antirheumatic drugs (bDMARDs) are a major cost driver in the management of psoriatic arthritis (PsA). Currently there are no published cost-effectiveness analyses (CEAs) comparing the interleukin-17A antagonists ixekizumab and secukinumab in Spain. We conducted a CEA from the perspective of the Spanish National Health System comparing ixekizumab versus secukinumab in bDMARD-naïve patients with PsA and concomitant moderate-to-severe psoriasis.

**Design:** A Markov model with a lifetime horizon and monthly cycles was developed based on the widely accepted York model. Four health states were included: a 12- or 16-week bDMARD induction period, maintenance therapy, best supportive care (BSC) and death. Treatment response was assessed based on both Psoriatic Arthritis Response Criteria (PsARC) and  $\geq 90\%$  improvement in the Psoriasis Area Severity Index (PASI90). At the end of the induction period, responders transitioned to maintenance therapy. Non-responders and patients who discontinued maintenance therapy transitioned to BSC. Clinical efficacy data were derived from a network meta-analysis. Health utilities were generated by applying a regression analysis to PASI and Health Assessment Questionnaire – Disability Index scores collected in the ixekizumab SPIRIT studies. Results were subject to extensive sensitivity and scenario analysis.

**Results:** Ixekizumab was less costly and provided more quality-adjusted life-years (QALYs) than secukinumab. Although ixekizumab performed favourably over secukinumab in the base-case analysis, cost savings and QALY gains were modest. Total costs were €153,901 compared with €156,559 for secukinumab (difference –€2,658). Total QALYs were 9.175 versus 9.082 (difference 0.093). Base-case results were most sensitive to the annual bDMARD discontinuation rate and the modification of PsARC and PASI90 response to ixekizumab or secukinumab.

1  
2  
3 **Conclusions:** Ixekizumab provided more QALYs at a lower cost than secukinumab in  
4 bDMARD-naïve patients in Spain. However, total costs and QALYs differences were modest.  
5  
6 Sensitivity analysis showed that base-case results were generally robust to changes in most  
7  
8 input parameters.  
9  
10

## 11 12 13 14 15 **ARTICLE SUMMARY**

### 16 17 **Strengths and limitations of this study**

- 18  
19 • A cost-effectiveness analysis was performed from the perspective of the Spanish  
20 National Health System comparing two interleukin-17A antagonists, ixekizumab and  
21 secukinumab  
22  
23
- 24  
25 • The framework of this model is closely aligned with the York model; the 'gold  
26 standard' model for the economic evaluation of biologic treatments in PsA  
27  
28
- 29  
30 • The current model uses a combined response criterion of PsARC and PASI to  
31 capture both joint and skin manifestations of PsA  
32  
33
- 34  
35 • This analysis was limited by a lack of data available for related to constituents, costs  
36 and efficacy of supportive care given to PsA patients in Spain  
37  
38
- 39  
40 • Due to uncertainty regarding the annual all-cause discontinuation rate, this model used  
41 assumptions consistent with previous models  
42  
43  
44  
45  
46  
47  
48  
49  
50  
51  
52  
53  
54  
55  
56  
57  
58  
59  
60

## INTRODUCTION

Psoriatic arthritis (PsA) is a chronic inflammatory rheumatic disease characterised by pain, swelling and erosion of the joints.[1] PsA affects approximately 0.25% of the population worldwide [1] and 0.6% of the adult population in Spain.[2] PsA commonly co-exists with psoriasis, developing in up to 30% of psoriatic patients, and over 90% of patients with PsA will have concomitant psoriasis.[3,4] As a lifelong condition, PsA has a detrimental impact on quality of life due to pain and/or physical functional limitations associated with the disease.[1,3] It is also associated with substantial use of healthcare resources and high socioeconomic costs.[5,6]

A number of biologic disease-modifying antirheumatic drugs (bDMARDs), which inhibit key inflammatory cytokines, are approved for treating patients with PsA. Interleukin (IL)-17 has been identified as an effective target for the treatment of inflammatory diseases including PsA.[1,3] Ixekizumab, a high-affinity monoclonal antibody, is the most recently approved bDMARD targeting IL-17A for PsA, joining secukinumab, which uses the same target and similar mode of action.[7,8]

bDMARDs are considered major drivers of healthcare costs,[5] and the cost-effectiveness of these therapies often comes under scrutiny. Cost-effectiveness analyses (CEAs) comparing bDMARDs have been conducted using the York model,[9] an established economic framework, which, together with its subsequent versions, is considered the 'gold standard' for conducting CEAs in PsA.[10,11]

As inhibition of IL-17A is a relatively new mechanism of action, drugs in this class have not been the focus of CEAs.[12] To date, there are no published CEAs comparing ixekizumab with secukinumab (another IL-17A inhibitor) in Spain.

We conducted a CEA assessing the cost effectiveness, in terms of the incremental cost per quality-adjusted life-year (QALY) gained, of ixekizumab versus secukinumab in bDMARD-naïve patients with active PsA and concomitant moderate-to-severe psoriasis from the

1  
2  
3 perspective of the Spanish National Health System (NHS). Secukinumab was selected as a  
4 comparator for this CEA as both drugs belong to the same class, and this may be of interest  
5 to decision makers assessing these IL-17A inhibitors. In addition, both drugs are approved for  
6 the treatment of PsA and plaque psoriasis, and have demonstrated high efficacy, particularly  
7 on skin symptoms.[7,8] This CEA focused on bDMARD-naïve patients, as this patient  
8 population may receive greater clinical benefit from earlier (i.e. first-line) treatment.[13]  
9  
10  
11  
12  
13  
14

## 15 16 **METHODS**

### 17 18 **Model overview**

19  
20  
21  
22 A Markov model was developed to assess the cost effectiveness of ixekizumab versus  
23 secukinumab in a hypothetical cohort of bDMARD-naïve patients with active PsA and  
24 concomitant moderate-to-severe psoriasis in Spain. The Markov model framework  
25 accommodates different health states and is based on the assumption that future events  
26 depend on the current health state of the patient. The model was programmed in Visual Basics  
27 for Applications with a user interface in Microsoft® Excel.  
28  
29  
30  
31  
32  
33  
34

35  
36 The model is based on the most recent version of the York model [11] with monthly cycles and  
37 a lifetime horizon, which was considered appropriate to reflect the chronic nature of PsA as  
38 well as the treatment aim of delaying disease progression.[14] The model incorporated age-  
39 and gender-dependent mortality data for the normal Spanish population. Mean age and  
40 gender distribution was taken from the patient population in the SPIRIT-P1 and -P2 trials of  
41 ixekizumab in PsA.[15,16] Increased PsA-specific mortality risks from two different sources  
42 [17,18] were implemented in scenario analyses.  
43  
44  
45  
46  
47  
48  
49  
50

51  
52 The model includes four health states: 1) a 12- or 16-week bDMARD induction period; 2)  
53 maintenance bDMARD therapy; 3) best supportive care (BSC); and 4) death (Figure 1). A  
54 combination of Psoriatic Arthritis Response Criteria (PsARC) and Psoriasis Area Severity  
55 Index (PASI) was used to measure joint and skin response at the end of the induction period  
56 (Figure 2). The induction period was set to 12 weeks and 16 weeks for ixekizumab and  
57  
58  
59  
60



1  
2  
3 secukinumab, respectively. The induction period was chosen to reflect the time at which  
4 treatment efficacy is usually followed-up in clinical practice (approximately 3 months in  
5 Spain).[19,20] The PsARC response to treatment was defined as an improvement from  
6 baseline in two of four criteria without worsening in any measure: tender/swollen joints; and  
7 physician/patient global assessment of disease activity (one of which must be a joint count).  
8  
9 In a consensus from the Spanish Psoriasis Group, a panel of dermatologists agreed that a  
10 complete or nearly complete PASI response is the most relevant measure of effectiveness in  
11 clinical practice.[21] With this in mind,  $\geq 90\%$  improvement in PASI (PASI90) was chosen in  
12 the base-case analysis as part of the response criteria and the treatment effect measures in  
13 this model.  
14  
15  
16  
17  
18  
19  
20  
21  
22  
23  
24

### 25 **Treatment sequences**

26  
27 At the end of the induction period, responders transitioned to maintenance therapy, while non-  
28 responders and discontinuers transitioned to BSC (Figure 1) in which patients were assumed  
29 to receive standard treatment depending on their Health Assessment Questionnaire –  
30 Disability Index (HAQ-DI) and PASI status.[22] Dosage regimens for ixekizumab and  
31 secukinumab were as per the European Union label.[7,8] During maintenance therapy,  
32 patients were assumed to face a constant risk of all-cause treatment discontinuation, which  
33 was reflected by an annual discontinuation rate of 16.5% in line with previously applied  
34 methods.[10,11]  
35  
36  
37  
38  
39  
40  
41  
42  
43  
44

45 In the base-case analysis, baseline cohort characteristics were reflective of the demographic  
46 data from the ixekizumab SPIRIT-P1 and -P2 clinical trials [15,16] (Table 1).  
47  
48  
49

### 50 **Treatment effect**

51  
52 While PsARC and PASI90 were used as the combined response criterion (i.e. treatment  
53 continuation rule), the treatment effect was modelled as a change in baseline of the HAQ-DI  
54 and PASI scores,[23] reflecting the joint and skin components of PsA, respectively. Baseline  
55 HAQ-DI and PASI scores were derived from the SPIRIT-P1 and -P2 trials [15,16] (Table 1).  
56  
57  
58  
59  
60

1  
2  
3 Treatment effect, represented by improvement (i.e. reductions) in HAQ-DI and PASI scores,  
4 was assumed to be instantaneous; as such, the response was also applied during the  
5 induction period. Absolute change in HAQ-DI and PASI scores is based on data from a  
6 network meta-analysis (NMA).[23]  
7  
8  
9  
10

11  
12 For patients who met the combined response of PsARC and PASI90 at the end of the induction  
13 period, the initial improvements in HAQ-DI and PASI continued during maintenance therapy  
14 until they transitioned into BSC. For patients entering BSC following discontinuation, it was  
15 assumed that some benefit was maintained from the initial bDMARD treatment. In the base  
16 case, for patients progressing to BSC, the HAQ-DI score was assumed to revert to the  
17 baseline HAQ-DI level prior to discontinuation (“rebound equal to initial gain”). The rebound  
18 effect was assumed to be immediate and patients were modelled to progress at the same rate  
19 as natural history progression (an increase of 0.018 per 3-month period) (Figure 3). For PASI  
20 score, it was assumed that for non-responders not meeting PASI90, there would still be some  
21 gain in PASI – albeit lower – while they were treated with a bDMARD in the induction period.  
22 Once in the BSC state, due to the progressive nature of PsA, it was assumed that patients  
23 would deteriorate at a rate of natural progression.  
24  
25  
26  
27  
28  
29  
30  
31  
32  
33  
34  
35  
36  
37

### 38 **Health utilities**

39  
40  
41 Health utilities were based on HAQ-DI and PASI scores from the SPIRIT-P1 and -P2 clinical  
42 trials[15,16] with Spanish tariffs applied. Calculation of utilities followed the established  
43 methodology of mapping three-level version of EuroQol-5 Dimensions (EQ-5D-3L) utilities on  
44 HAQ and PASI scores using a parsimonious linear regression model without further covariates  
45 or interaction terms. [9–11] Alternative coefficients based on a similar algorithm using different  
46 data were applied in a sensitivity analysis. Utilities were calculated in each model cycle by  
47 multiplying HAQ and PASI levels with the estimated regression coefficients.  
48  
49  
50  
51  
52  
53  
54  
55

### 56 **Resource use and costs**

1  
2  
3 As the CEA was conducted from the perspective of the Spanish NHS, only direct medical  
4 costs were considered in the model, and included medication, injection training, physician  
5 visits and therapy monitoring. Drug acquisition costs were derived from the Botplus database  
6 in Spain,[24] and costs for the administration and monitoring of treatments were obtained from  
7 various sources in Spain [25] (Table 2). Drug costs were based on the list prices as of Q4  
8 2018. Monitoring costs were based on the costing schedule published in 2017, which was still  
9 valid in 2018. Due to a lack of healthcare resource utilisation data by drug or class, healthcare  
10 costs and resource utilisation related to the administration and monitoring of bDMARDs was  
11 determined by an expert panel of four Spanish physicians (two rheumatologists and two  
12 dermatologists).

13  
14  
15  
16  
17  
18  
19  
20  
21  
22  
23  
24  
25 The severity of arthritis and psoriasis also may have an impact on healthcare costs.[10,11] To  
26 reflect this, costs related to HAQ-DI and PASI were also included per cycle in the  
27 model.[22;10] These costs were derived using algorithms that provided estimates of costs  
28 based on absolute HAQ-DI and PASI in the modelled cohort.

29  
30  
31  
32  
33  
34  
35  
36  
37  
38  
39  
40  
41  
42  
43  
44  
45  
46  
47  
48  
49  
50  
51  
52  
53  
54  
55  
56  
57  
58  
59  
60  
Aside from costs related to HAQ-DI and PASI, no additional costs were applied for patients in  
BSC. The costs of serious adverse events (i.e. requiring hospitalisation) associated with  
bDMARD treatment were not included in the base-case analysis, but they were included in a  
sensitivity analysis. The rates of adverse events were derived from the summary of product  
characteristics of ixekizumab and secukinumab.[7,8]

### **Sensitivity analyses**

To explore the uncertainty inherent in the model, one-way (deterministic) sensitivity analysis,  
probabilistic sensitivity analysis and scenario analyses were undertaken. In the one-way  
sensitivity analysis, one variable at a time was altered to examine the effect on the results.  
Most input parameters varied by  $\pm 20\%$  of the mean value, as 95% confidence interval (CI)  
values were not available. Exceptions to this included ranges of values used for the annual  
discontinuation rate (95% CI); discount rates for costs and health utilities (0%; 5%); treatment

1  
2  
3 efficacy ( $\pm 10\%$  of the mean value); HAQ-DI improvement conditional on response (NMA  
4 results); physician and monitoring costs ( $\pm 1$  visit); and utility equations for PASI and HAQ-DI  
5 coefficients.  
6  
7  
8

9  
10 A probabilistic sensitivity analysis was conducted by assigning distributions to input  
11 parameters and sampling from these distributions in 1000 iterations. For efficacy inputs, the  
12 convergence diagnostics and output analysis of the Bayesian NMA was used instead of  
13 applying parametric distributions. The input parameters included PsARC and PASI response  
14 rates, changes in HAQ-DI based on response criterion, costs based on HAQ-DI and PASI,  
15 discontinuation rates, various healthcare-related costs and the use of resources.  
16  
17  
18  
19  
20  
21  
22

23 A scenario analysis was conducted using a 10-year time horizon and alternative inputs for  
24 discount rates, increased PsA mortality, the definition of responders, the HAQ-DI rebound  
25 method, the utility equation, health state costs and placebo efficacy in BSC.  
26  
27  
28  
29

## 30 **RESULTS**

31  
32  
33 Results of the base-case analysis in bDMARD-naïve patients with PsA and concomitant  
34 moderate-to-severe psoriasis are summarised in Table 3. Ixekizumab was associated with  
35 total cost savings of €2,658 compared with secukinumab (total costs €153,901 vs €156,559).  
36  
37 Total QALYs were higher for ixekizumab (9.175 vs 9.082, difference 0.093). Although  
38 ixekizumab performed favourably over secukinumab in the base-case analysis, cost savings  
39 and QALY gains were modest.  
40  
41  
42  
43  
44  
45

46 The deterministic sensitivity analysis showed that base-case results were generally robust to  
47 changes in most input parameters, but were most sensitive to the annual discontinuation rate  
48 for bDMARD therapy and modifications in PsARC and PASI90 response to ixekizumab or  
49 secukinumab (Figure 4).  
50  
51  
52  
53  
54

55 The probabilistic sensitivity analysis showed that approximately 49.5% of observations were  
56 in the south-east quadrant, indicating that ixekizumab was still less costly and provided more  
57  
58  
59  
60

1  
2  
3 QALYs than secukinumab (Figure 5). Across the cost-effectiveness plane, 99% of replications  
4  
5 were located south-east of the line defined by a willingness to pay threshold of €30,000 per  
6  
7 QALY gained.  
8  
9

10 Overall, the scenario analyses showed that most of the parameters tested had relatively little  
11  
12 impact on the base-case results (Figure 6). In most scenarios, ixekizumab provided more  
13  
14 QALYs at a lower cost than secukinumab. While there was some variability regarding  
15  
16 incremental cost and QALYs between ixekizumab versus secukinumab, in all scenarios the  
17  
18 mean results still indicated the dominance of ixekizumab over secukinumab.  
19  
20

## 21 **DISCUSSION**

22  
23  
24 In this CEA, the cost effectiveness of ixekizumab compared to secukinumab was evaluated in  
25  
26 bDMARD-naïve patients with active PsA and concomitant moderate-to-severe psoriasis from  
27  
28 the perspective of the Spanish NHS. In general, ixekizumab performed favourably over  
29  
30 secukinumab in the base-case analysis; however, differences in cost savings and QALY gains  
31  
32 were modest. The total difference in cost between ixekizumab and secukinumab was –€2,658,  
33  
34 while the total difference in QALYs was 0.093. In the deterministic sensitivity analysis, the  
35  
36 most influential variables were the annual discontinuation rate and the PsARC and PASI90  
37  
38 response for ixekizumab and secukinumab. Drug costs are usually a major driver; however,  
39  
40 according to this model, other parameters related to disease were shown to have an impact.  
41  
42  
43

44 The framework of this model is closely aligned with the most recently revised version of the  
45  
46 York model,[11] which is considered a 'benchmark' model for the economic evaluation of  
47  
48 biologic treatments in PsA. The original York model has subsequently been revised to  
49  
50 accommodate the analysis of patient subgroups. The model used in this analysis includes this  
51  
52 amendment as a key feature. The current model also allows for combining PsARC and PASI  
53  
54 as a response criterion, therefore capturing both joint and skin response. A combined  
55  
56 response criterion presents a more realistic representation of this multifaceted disease and  
57  
58  
59  
60

1  
2  
3 may be especially useful when evaluating clinical benefits of bDMARDs, such as IL-17A  
4 antagonists, which are known for their proven efficacy on skin response.[26,27]  
5  
6  
7

8 A limitation of this analysis was a lack of available data for health state cost estimates and  
9 constituents and the efficacy of BSC. There is also uncertainty regarding the annual all-cause  
10 discontinuation rate; therefore, our model used input data that were consistent with previously  
11 applied methods.[10,11] In addition, the actual acquisition costs of bDMARDs in clinical  
12 practice tend to differ from list prices because any confidential discounts are unknown and  
13 therefore cannot be reflected in the analyses.  
14  
15  
16  
17  
18  
19  
20  
21  
22  
23  
24  
25  
26  
27  
28  
29  
30  
31  
32  
33  
34  
35  
36  
37  
38  
39  
40  
41  
42  
43  
44  
45  
46  
47  
48  
49  
50  
51  
52  
53  
54  
55  
56  
57  
58  
59  
60

For peer review only

## CONCLUSION

In this CEA of ixekizumab versus secukinumab in bDMARD-naïve patients with PsA and concomitant moderate-to-severe psoriasis in Spain, ixekizumab provided more QALYs at a lower cost than secukinumab. However, differences in total costs and QALYs were modest; therefore, other factors, such as patient preferences, may also be considered during clinical decision making. Base-case results were generally robust to modifications in most input parameters, but were most sensitive to the annual bDMARD discontinuation rate and variations in PsARC and PASI90 response to ixekizumab or secukinumab.

## ACKNOWLEDGMENTS

The authors would like to acknowledge Elinor Wylde and Greg Plosker (Rx Communications, Mold, UK) for medical writing assistance with the preparation of this manuscript, funded by Eli Lilly.

## FUNDING

This work was funded by Eli Lilly and Company.

## CONFLICTS OF INTEREST

**BS** and **CM** are full-time employees of ICON who were commissioned by Eli Lilly and Company to conduct the analysis for this work. **MN**, **TD**, **CS** and **SH** are full-time employees of Eli Lilly and Company; they receive a salary and own company stock.

## AUTHOR CONTRIBUTIONS

**BS** and **CM** were involved with the conception and design of the work, and the interpretation of the data. **MN** and **CS** were involved with the acquisition and interpretation of the data. **TD** was involved with the conception of the work and interpretation of the data. **SH** was involved with the interpretation of the data. All named have provided critical revision of the manuscript for important intellectual content and have given their approval for this version to be published. All authors had full access to all of the data in this study and take complete responsibility for the integrity of the data and accuracy of the data analysis.

## DATA SHARING STATEMENT

No additional data are available.

## PATIENT AND PUBLIC INVOLVEMENT

Patients or the public were not involved in this work.



## REFERENCES

1. McArdle A, Pennington S, FitzGerald O. Clinical features of psoriatic arthritis: a comprehensive review of unmet clinical needs. *Clin Rev Allergy Immunol* 2018;55:271–94.
2. Seoane-Mato D, Sánchez-Piedra C, Díaz-González F, et al. THU0684 Prevalence of rheumatic diseases in adult population in Spain. Episer 2016 study. *Ann Rheum Dis* 2018;77:535–36.
3. Ritchlin CT, Colbert RA, Gladman DD. Psoriatic arthritis. *N Engl J Med* 2017;376:957–70.
4. Ciocon DH, Kimball AB. Psoriasis and psoriatic arthritis: separate or one and the same? *Br J Dermatol* 2007;157(5):850–60.
5. D'Angiolella LS, Cortesi PA, Lafranconi A, et al. Cost and cost effectiveness of treatments for psoriatic arthritis: a systematic literature review. *Pharmacoeconomics* 2018;36:567–89.
6. Kawalec P, Malinowski KP. The indirect costs of psoriatic arthritis: systematic review and meta-analysis. *Expert Rev Pharmacoecon Outcomes Res* 2015;15:125–32.
7. European Medicines Agency. Ixekizumab (Taltz): Summary of product characteristics 2016. [www.ema.europa.eu/documents/product-information/taltz-epar-product-information\\_en.pdf](http://www.ema.europa.eu/documents/product-information/taltz-epar-product-information_en.pdf) (accessed 22 Mar 2019).
8. European Medicines Agency. Secukinumab (Cosentyx): Summary of product characteristics 2015. [www.ema.europa.eu/documents/product-information/cosentyx-epar-product-information\\_en.pdf](http://www.ema.europa.eu/documents/product-information/cosentyx-epar-product-information_en.pdf) (accessed 22 Mar 2019).
9. Woolacott N, Bravo Vergel Y, Hawkins N, et al. Etanercept and infliximab for the treatment of psoriatic arthritis: a systematic review and economic evaluation. *Health Technol Assess* 2006;10:iii–iv, xiii–xvi, 1–239.

- 1  
2  
3 10. Rodgers M, Epstein D, Bojke L, et al. Etanercept, infliximab and adalimumab for the  
4 treatment of psoriatic arthritis: a systematic review and economic evaluation. *Health*  
5 *Technol Assess* 2011;15:i–xxi, 1–329.  
6  
7
- 8  
9 11. Corbett M, Chehadah F, Biswas M, et al. Certolizumab pegol and secukinumab for  
10 treating active psoriatic arthritis following inadequate response to disease-modifying  
11 antirheumatic drugs: a systematic review and economic evaluation. *Health Technol*  
12 *Assess* 2017;21:1–326.  
13  
14
- 15 12. Wasilewska A, Winiarska M, Olszewska M, et al. Interleukin-17 inhibitors. A new era  
16 in treatment of psoriasis and other skin diseases. *Postepy Dermatol Alergol*  
17 2016;33:247–52.  
18  
19
- 20 13. Raychaudhuri SP, Wilken R, Sukhov AC, et al. Management of psoriatic arthritis: Early  
21 diagnosis, monitoring of disease severity and cutting edge therapies. *J Autoimmun*  
22 2017;76:21–37.  
23  
24
- 25 14. Mease PJ, Armstrong AW. Managing patients with psoriatic disease: the diagnosis and  
26 pharmacologic treatment of psoriatic arthritis in patients with psoriasis. *Drugs*  
27 2014;74:423–41.  
28  
29
- 30 15. Mease PJ, van der Heijde D, Ritchlin CT, et al. Ixekizumab, an interleukin-17A specific  
31 monoclonal antibody, for the treatment of biologic-naïve patients with active psoriatic  
32 arthritis: results from the 24-week randomised, double-blind, placebo-controlled and  
33 active (adalimumab)-controlled period of the phase III trial SPIRIT-P1. *Ann Rheum Dis*  
34 2017;76:79–87.  
35  
36
- 37 16. Nash P, Kirkham B, Okada M, et al. Ixekizumab for the treatment of patients with active  
38 psoriatic arthritis and an inadequate response to tumour necrosis factor inhibitors:  
39 results from the 24-week randomised, double-blind, placebo-controlled period of the  
40 SPIRIT-P2 phase 3 trial. *Lancet* 2017;389:2317–27.  
41  
42
- 43 17. Ali Y, Tom BD, Schentag CT, et al. Improved survival in psoriatic arthritis with calendar  
44 time. *Arthritis Rheum* 2007;56:2708–14.  
45  
46  
47  
48  
49  
50  
51  
52  
53  
54  
55  
56  
57  
58  
59  
60

- 1  
2  
3 18. Wong K, Gladman DD, Husted J, et al. Mortality studies in psoriatic arthritis: results  
4 from a single outpatient clinic. I. Causes and risk of death. *Arthritis Rheum*  
5 1997;40:1868–72.  
6  
7  
8  
9  
10 19. Torre Alonso JC, Díaz Del Campo Fontecha P, Almodóvar R, et al. Recommendations  
11 of the Spanish Society of Rheumatology on treatment and use of systemic biological  
12 and non-biological therapies in psoriatic arthritis. *Reumatol Clin* 2018;14:254–68.  
13  
14  
15  
16 20. Ruiz-Villaverde R, Rodriguez-Fernandez-Freire L, Galán-Gutierrez M, et al. Eficacia  
17 del secukinumab en psoriasis y artritis psoriásica: estudio multicéntrico retrospectivo.  
18 *Med Clin (Barc)* 2019; pii:S0025-7753(19)30006-5  
19 doi.org/10.1016/j.medcli.2018.12.009  
20  
21  
22  
23  
24 21. Carretero G, Puig L, Carrascosa JM, et al. Redefining the therapeutic objective in  
25 psoriatic patient candidates for biological therapy. *J Dermatolog Treat* 2018;29:334–  
26 46.  
27  
28  
29  
30 22. Kobelt G, Jönsson L, Lindgren P, et al. Modeling the progression of rheumatoid  
31 arthritis: a two-country model to estimate costs and consequences of rheumatoid  
32 arthritis. *Arthritis Rheum* 2002;46:2310–19.  
33  
34  
35  
36  
37 23. Ruysen-Witrand A, Sapin C, Hartz S, et al. THU0290 Effects of biologic dmards on  
38 physical function in patients with active psoriatic arthritis: results of network meta-  
39 analyses. *Ann Rheum Dis* 2018;77:363–4.  
40  
41  
42  
43 24. Consejo General de Colegios Oficiales de Farmacéuticos. Botplus database 2018.  
44 <https://botplusweb.portalfarma.com/botplus.aspx> (accessed 22 Mar 2019).  
45  
46  
47 25. Oblikue Consulting. Base de datos de costes sanitarios españoles: eSalud 2007.  
48 <http://www.oblikue.com/bddcostes/> (accessed 22 Mar 2019).  
49  
50  
51 26. Betteridge N, Boehncke WH, Bundy C, et al. Promoting patient-centred care in  
52 psoriatic arthritis: a multidisciplinary European perspective on improving the patient  
53 experience. *J Eur Acad Dermatol Venereol* 2016;30:576–85.  
54  
55  
56  
57  
58  
59  
60

- 1  
2  
3 27. Gottlieb AB, Strand V, Kishimoto M, et al. Ixekizumab improves patient-reported  
4 outcomes up to 52 weeks in bDMARD-naïve patients with active psoriatic arthritis  
5 (SPIRIT-P1). *Rheumatology (Oxford)*. 2018;57:1777–88.  
6  
7  
8  
9 28. Mease PJ, Antoni CE, Gladman DD, et al. Psoriatic arthritis assessment tools in clinical  
10 trials. *Ann Rheum Dis* 2005;64:ii49–54.  
11  
12  
13 29. Fransen J, Antoni C, Mease PJ, et al. Performance of response criteria for assessing  
14 peripheral arthritis in patients with psoriatic arthritis: analysis of data from randomised  
15 controlled trials of two tumour necrosis factor inhibitors. *Ann Rheum Dis*  
16 2006;65:1373–8.  
17  
18  
19  
20  
21  
22  
23  
24  
25  
26  
27  
28  
29  
30  
31  
32  
33  
34  
35  
36  
37  
38  
39  
40  
41  
42  
43  
44  
45  
46  
47  
48  
49  
50  
51  
52  
53  
54  
55  
56  
57  
58  
59  
60

**Table 1.** Characteristics of the target population of bDMARD-naïve patients with PsA and concomitant moderate-to-severe psoriasis based on pooled data from the intent-to-treat trial populations of SPIRIT-P1 and -P2 with ixekizumab [15,16]

| Parameter             | Mean value |
|-----------------------|------------|
| Age                   | 51.0 years |
| Proportion male       | 51.8%      |
| Proportion female     | 48.2%      |
| Body weight           | 87.0 kg    |
| Baseline HAQ-DI score | 1.19       |
| Baseline PASI score   | 20.4       |

bDMARD, biologic disease-modifying anti-rheumatic drug; HAQ-DI, Health Assessment Questionnaire — Disability Index; PASI, Psoriasis Area Severity Index; PsA, psoriatic arthritis.

**Table 2.** Costs for administration and monitoring of treatment in Spain [24,25]

| Resource                                    | Cost <sup>a</sup>  | Source                                                                                |
|---------------------------------------------|--------------------|---------------------------------------------------------------------------------------|
| <i>Drug acquisition costs (list prices)</i> |                    |                                                                                       |
| Ixekizumab 80 mg Q4W pre-filled pen         | €934.25 per dose   | Botplus database [24] minus rebate of 7.5% according to Spanish regulation RDL 8/2010 |
| Secukinumab 300 mg pre-filled pen           | €1,057.38 per dose | Botplus database [24] minus rebate of 7.5% according to Spanish regulation RDL 8/2010 |
| <i>Visits</i>                               |                    |                                                                                       |
| Rheumatologist                              | €220.62            | Base de datos de costes sanitarios españoles [25]                                     |
| Dermatologist                               | €100.58            | Base de datos de costes sanitarios españoles [25]                                     |
| GP                                          | €33.86             | Base de datos de costes sanitarios españoles [25]                                     |
| <i>Monitoring</i>                           |                    |                                                                                       |
| Full blood count                            | €67.98             | Base de datos de costes sanitarios españoles [25]                                     |
| Erythrocyte sedimentation rate              | €1.03              | Base de datos de costes sanitarios españoles [25]                                     |
| Chest X-ray                                 | €42.23             | Base de datos de costes sanitarios españoles [25]                                     |
| Tuberculosis test                           | €8.95              | Base de datos de costes sanitarios españoles [25]                                     |
| C-reactive protein test                     | €8.95              | Base de datos de costes sanitarios españoles [25]                                     |

GP, general practitioner; Q4W, every four weeks.

**Table 3.** Results of the base-case analysis comparing ixekizumab and secukinumab in bDMARD-naïve patients with active PsA and concomitant moderate-to-severe psoriasis

| Parameter                              | Ixekizumab | Secukinumab | Difference |
|----------------------------------------|------------|-------------|------------|
| <i>Costs (year 2018 values)</i>        |            |             |            |
| Total costs                            | €153,901   | €156,559    | -€2,658    |
| Treatment costs                        | €26,424    | €27,729     | -€1,305    |
| Administration costs                   | €26        | €24         | €2         |
| Physician visit costs                  | €4,141     | €4,202      | -€61       |
| Monitoring costs                       | €797       | €706        | €92        |
| On treatment HAQ-DI/PASI-related costs | €4,608     | €4,115      | €494       |
| BSC costs                              | €117,904   | €119,784    | -€1,880    |
| <i>QALYs</i>                           |            |             |            |
| Total QALYs                            | 9.175      | 9.082       | 0.093      |

BSC, best supportive care; HAQ-DI, Health Assessment Questionnaire – Disability Index; PASI, Psoriasis Area Severity Index; PsA, psoriatic arthritis; QALYs, quality-adjusted life-years.

## Figure Legends

**Figure 1.** Schematic representation of the model structure in bDMARD-naïve patients with active PsA and concomitant moderate-to-severe psoriasis. Dosage regimens were according to European Union labelling. Although not shown in the figure, patients could transition to death from any state.

BSC, best supportive care; bDMARD, biologic disease-modifying anti-rheumatic drug; PsA, psoriatic arthritis; Q4W, every 4 weeks.

**Figure 2.** Psoriatic Arthritis Response Criteria (PsARC) and Psoriasis Area Severity Index (PASI) criteria used for the treatment continuation rule for ixekizumab and secukinumab.[28,29] A combination of PsARC response and  $\geq 90\%$  improvement in PASI (PASI90) was used to capture both joint and skin response at the end of the induction period.

**Figure 3.** Scenarios for HAQ-DI rebound after the discontinuation of treatment.

HAQ-DI, Health Assessment Questionnaire – Disability Index.

**Figure 4.** Results of the one-way sensitivity analysis in bDMARD-naïve patients with PsA and concomitant moderate-to-severe psoriasis.

bDMARD, biologic disease-modifying anti-rheumatic drug; CI, confidence interval; FBC, full blood count; HAQ-DI, Health Assessment Questionnaire-Disability Index; ICER, incremental cost-effectiveness ratio; Ixe, ixekizumab; p.a., per annum; PASI90,  $\geq 90\%$  reduction from baseline Psoriasis Area Severity Index score; PsA, psoriatic arthritis; PsARC, Psoriatic Arthritis Response Criteria; QALY, quality-adjusted life-year; Q4W, every 4 weeks; SE, standard error; Sec, secukinumab; Trt, treatment.



1  
2  
3 **Figure 5.** Results of the probabilistic sensitivity analysis in bDMARD-naïve patients with PsA  
4 and concomitant moderate-to-severe psoriasis. Approximately 49.5% of observations were in  
5 the south-east quadrant, 28.6% were in the south-west quadrant and 21.9% were in the north-  
6 east quadrant of the cost-effectiveness plane.  
7  
8  
9

10  
11 bDMARD, biologic disease-modifying anti-rheumatic drug; Ixe, ixekizumab; PsA, psoriatic  
12 arthritis; QALY, quality-adjusted life-year; Q4W, every 4 weeks; Sec, secukinumab; WTP,  
13 willingness to pay.  
14  
15  
16  
17  
18  
19

20 **Figure 6.** Results of scenario analyses in bDMARD-naïve patients with PsA and concomitant  
21 moderate-to-severe psoriasis.  
22

23 bDMARD, biologic disease-modifying anti-rheumatic drug; PASI75,  $\geq 75\%$  reduction in  
24 Psoriasis Area Severity Index score; PASI100, 100% reduction in PASI score; PsA, psoriatic  
25 arthritis; PsARC, Psoriatic Arthritis Response Criteria; QALY, quality-adjusted life-year; Resp,  
26 response; yrs, years.  
27  
28  
29  
30  
31  
32  
33  
34  
35  
36  
37  
38  
39  
40  
41  
42  
43  
44  
45  
46  
47  
48  
49  
50  
51  
52  
53  
54  
55  
56  
57  
58  
59  
60

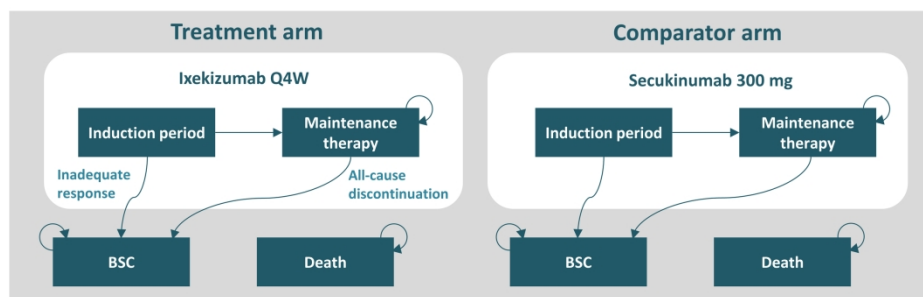

Figure 1. Schematic representation of the model structure in bDMARD-naïve patients with active PsA and concomitant moderate-to-severe psoriasis. Dosage regimens were according to European Union labelling. Although not shown in the figure, patients could transition to death from any state.

228x75mm (300 x 300 DPI)

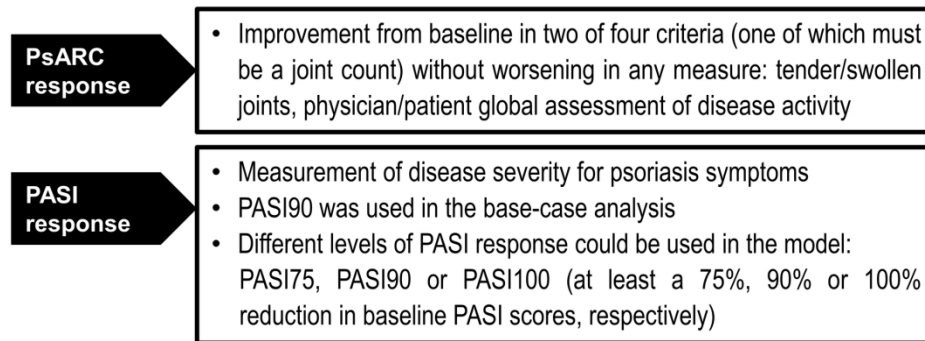

Figure 2. Psoriatic Arthritis Response Criteria (PsARC) and Psoriasis Area Severity Index (PASI) criteria used for the treatment continuation rule for ixekizumab and secukinumab.[28,29] A combination of PsARC response and  $\geq 90\%$  improvement in PASI (PASI90) was used to capture both joint and skin response at the end of the induction period.

178x70mm (300 x 300 DPI)

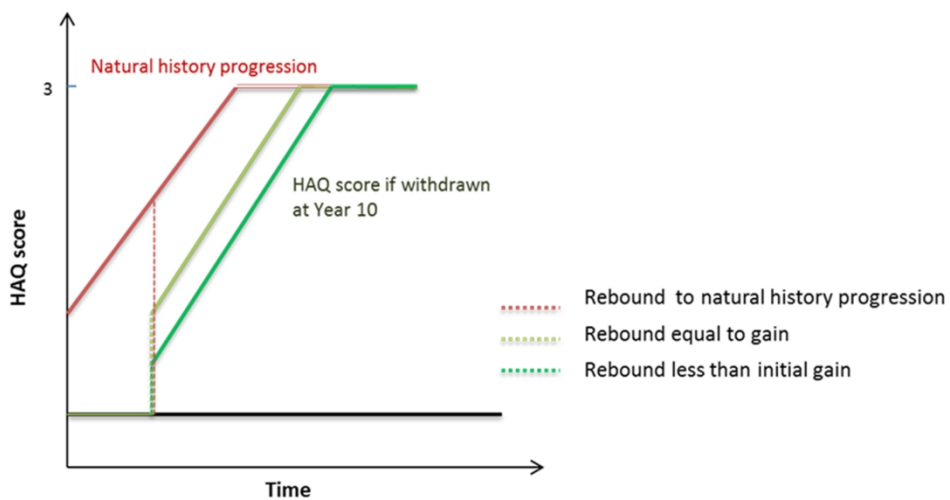

Figure 3. Scenarios for HAQ-DI rebound after the discontinuation of treatment.

228x120mm (300 x 300 DPI)

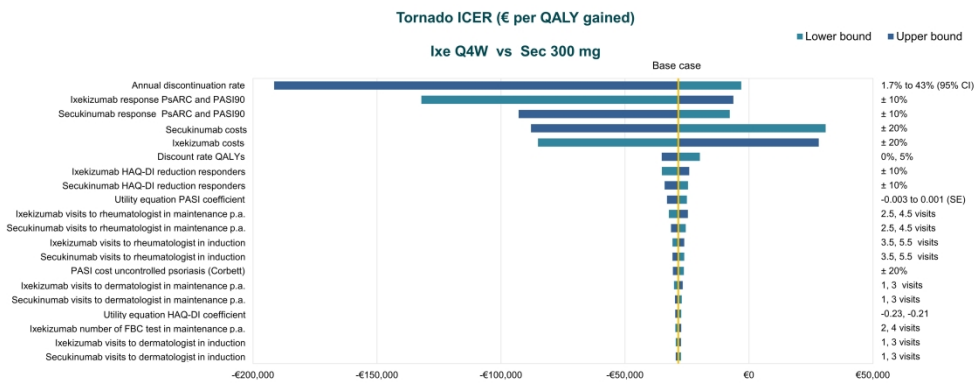

Figure 4. Results of the one-way sensitivity analysis in bDMARD-naïve patients with PsA and concomitant moderate-to-severe psoriasis.

338x140mm (300 x 300 DPI)

1  
2  
3  
4  
5  
6  
7  
8  
9  
10  
11  
12  
13  
14  
15  
16  
17  
18  
19  
20  
21  
22  
23  
24  
25  
26  
27  
28  
29  
30  
31  
32  
33  
34  
35  
36  
37  
38  
39  
40  
41  
42  
43  
44  
45  
46  
47  
48  
49  
50  
51  
52  
53  
54  
55  
56  
57  
58  
59  
60

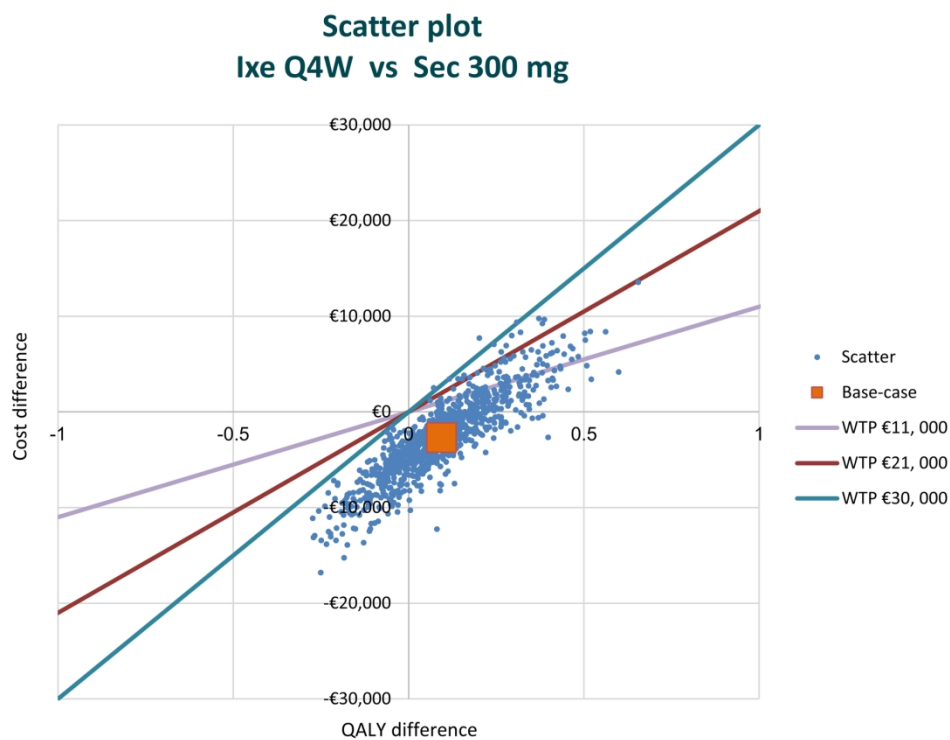

Figure 5. Results of the probabilistic sensitivity analysis in bDMARD-naïve patients with PsA and concomitant moderate-to-severe psoriasis. Approximately 49.5% of observations were in the south-east quadrant, 28.6% were in the south-west quadrant and 21.9% were in the north-east quadrant of the cost-effectiveness plane.

168x130mm (300 x 300 DPI)

1  
2  
3  
4  
5  
6  
7  
8  
9  
10  
11  
12  
13  
14  
15  
16  
17  
18  
19  
20  
21  
22  
23  
24  
25  
26  
27  
28  
29  
30  
31  
32  
33  
34  
35  
36  
37  
38  
39  
40  
41  
42  
43  
44  
45  
46  
47  
48  
49  
50  
51  
52  
53  
54  
55  
56  
57  
58  
59  
60

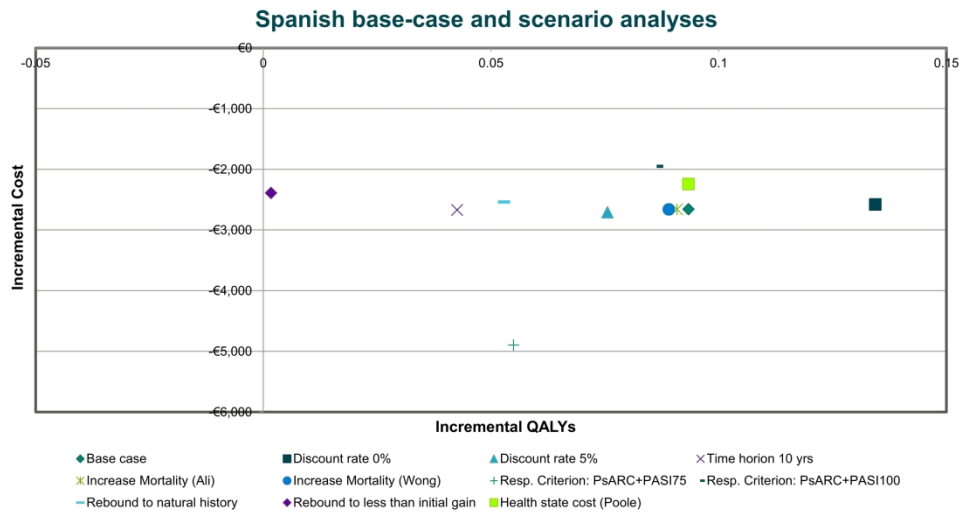

Figure 6. Results of scenario analyses in bDMARD-naïve patients with PsA and concomitant moderate-to-severe psoriasis.

273x145mm (300 x 300 DPI)

# BMJ Open

## Cost-effectiveness analysis of ixekizumab versus secukinumab in patients with psoriatic arthritis and concomitant moderate-to-severe psoriasis in Spain

|                                 |                                                                                                                                                                                                                                                                                                                                                                                                                                                                                                                                            |
|---------------------------------|--------------------------------------------------------------------------------------------------------------------------------------------------------------------------------------------------------------------------------------------------------------------------------------------------------------------------------------------------------------------------------------------------------------------------------------------------------------------------------------------------------------------------------------------|
| Journal:                        | <i>BMJ Open</i>                                                                                                                                                                                                                                                                                                                                                                                                                                                                                                                            |
| Manuscript ID                   | bmjopen-2019-032552.R1                                                                                                                                                                                                                                                                                                                                                                                                                                                                                                                     |
| Article Type:                   | Original research                                                                                                                                                                                                                                                                                                                                                                                                                                                                                                                          |
| Date Submitted by the Author:   | 24-Mar-2020                                                                                                                                                                                                                                                                                                                                                                                                                                                                                                                                |
| Complete List of Authors:       | Schweikert, Bernd; ICON, Real World Evidence Strategy & Analytics, Commercialisation & Outcomes<br>Malmberg, Chiara; ICON, Access, Commercialisation & Communications<br>Núñez, Mercedes; Eli Lilly and Company, Spain, Health Outcomes & Real World Evidence<br>Dilla, Tatiana; Eli Lilly and Company, Global Patient Outcomes & Real World Evidence International<br>Sapin, Christophe; Eli Lilly and Company, European Statistics<br>Hartz, Susanne; Eli Lilly and Company, Global Patient Outcomes & Real World Evidence International |
| <b>Primary Subject Heading</b>: | Rheumatology                                                                                                                                                                                                                                                                                                                                                                                                                                                                                                                               |
| Secondary Subject Heading:      | Health economics, Dermatology                                                                                                                                                                                                                                                                                                                                                                                                                                                                                                              |
| Keywords:                       | Ixekizumab, Secukinumab, Cost-effectiveness analysis, Spanish population, Psoriatic arthritis, Biologics                                                                                                                                                                                                                                                                                                                                                                                                                                   |
|                                 |                                                                                                                                                                                                                                                                                                                                                                                                                                                                                                                                            |

SCHOLARONE™  
Manuscripts





I, the Submitting Author has the right to grant and does grant on behalf of all authors of the Work (as defined in the below author licence), an exclusive licence and/or a non-exclusive licence for contributions from authors who are: i) UK Crown employees; ii) where BMJ has agreed a CC-BY licence shall apply, and/or iii) in accordance with the terms applicable for US Federal Government officers or employees acting as part of their official duties; on a worldwide, perpetual, irrevocable, royalty-free basis to BMJ Publishing Group Ltd ("BMJ") its licensees and where the relevant Journal is co-owned by BMJ to the co-owners of the Journal, to publish the Work in this journal and any other BMJ products and to exploit all rights, as set out in our [licence](#).

The Submitting Author accepts and understands that any supply made under these terms is made by BMJ to the Submitting Author unless you are acting as an employee on behalf of your employer or a postgraduate student of an affiliated institution which is paying any applicable article publishing charge ("APC") for Open Access articles. Where the Submitting Author wishes to make the Work available on an Open Access basis (and intends to pay the relevant APC), the terms of reuse of such Open Access shall be governed by a Creative Commons licence – details of these licences and which [Creative Commons](#) licence will apply to this Work are set out in our licence referred to above.

Other than as permitted in any relevant BMJ Author's Self Archiving Policies, I confirm this Work has not been accepted for publication elsewhere, is not being considered for publication elsewhere and does not duplicate material already published. I confirm all authors consent to publication of this Work and authorise the granting of this licence.

1  
2  
3  
4 **Cost-effectiveness analysis of ixekizumab versus secukinumab in**  
5 **patients with psoriatic arthritis and concomitant moderate-to-**  
6 **severe psoriasis in Spain**  
7  
8  
9

10  
11  
12 **Bernd Schweikert<sup>1</sup>, Chiara Malmberg<sup>2</sup>, Mercedes Nuñez<sup>3</sup>, Tatiana Dilla<sup>4</sup>,**  
13 **Christophe Sapin<sup>5</sup>, Susanne Hartz<sup>6</sup>**  
14  
15

16  
17  
18 **<sup>1</sup>Real World Evidence Strategy & Analytics, Commercialisation & Outcomes,**  
19 **ICON, Munich, Germany; <sup>2</sup>Access, Commercialisation & Communications,**  
20 **ICON, Munich, Germany; <sup>3</sup>Health Outcomes & Real World Evidence, Eli Lilly**  
21 **and Company, Madrid, Spain; <sup>4</sup>Global Patient Outcomes & Real World**  
22 **Evidence International, Eli Lilly and Company, Madrid, Spain; <sup>5</sup>Eli Lilly and**  
23 **Company, European Statistics, Neuilly-sur-Seine, France; <sup>6</sup>Global Patient**  
24 **Outcomes & Real World Evidence International, Eli Lilly and Company,**  
25 **Windlesham, UK**  
26  
27  
28  
29  
30  
31  
32

33 Corresponding Author: Bernd Schweikert

34  
35  
36  
37 Address: ICON, Konrad-Zuse-Platz 11, 81829 Munich, Germany

38  
39  
40  
41 Phone: +49(0)89.66610.5105

42 Email: Bernd.Schweikert@iconplc.com

43  
44 ORCID number: 0000-0001-8253-509X  
45  
46  
47  
48  
49

50 Running header: Cost-effectiveness of ixekizumab in psoriatic arthritis

51  
52  
53 Key words: Ixekizumab, Secukinumab, Cost-effectiveness analysis,  
54 Spanish population, Psoriatic arthritis, Biologics  
55  
56  
57  
58  
59  
60

## ABSTRACT

**Objective:** To conduct a cost-effectiveness analyses (CEA) from the perspective of the Spanish National Health System comparing ixekizumab versus secukinumab.

**Design:** A Markov model with a lifetime horizon and monthly cycles was developed based on the York model. Four health states were included: a 12- or 16-week biologic disease-modifying antirheumatic drugs (bDMARD) induction period, maintenance therapy, best supportive care (BSC) and death. Treatment response was assessed based on both Psoriatic Arthritis Response Criteria (PsARC) and  $\geq 90\%$  improvement in the Psoriasis Area Severity Index (PASI90). At the end of the induction period, responders transitioned to maintenance therapy. Non-responders and patients who discontinued maintenance therapy transitioned to BSC. Clinical efficacy data were derived from a network meta-analysis. Health utilities were generated by applying a regression analysis to PASI and Health Assessment Questionnaire – Disability Index (HAQ-DI) scores collected in the ixekizumab SPIRIT studies. Results were subject to extensive sensitivity and scenario analysis.

**Setting:** Spanish National Health System.

**Participants:** A hypothetical cohort of bDMARD-naïve patients with PsA and concomitant moderate-to-severe psoriasis was modelled.

**Interventions:** Ixekizumab and secukinumab.

**Results:** Ixekizumab performed favourably over secukinumab in the base-case analysis, although cost savings and quality-adjusted life-years (QALY) gains were modest. Total costs were €153,901 compared with €156,559 for secukinumab (difference –€2,658). Total QALYs were 9.175 versus 9.082 (difference 0.093). Base-case results were most sensitive to the annual bDMARD discontinuation rate and the modification of PsARC and PASI90 response to ixekizumab or secukinumab.

1  
2  
3 **Conclusions:** Ixekizumab provided more QALYs at a lower cost than secukinumab, with  
4 differences being on a relatively small scale. Sensitivity analysis showed that base-case  
5 results were generally robust to changes in most input parameters.  
6  
7  
8  
9  
10  
11  
12  
13  
14  
15  
16  
17  
18  
19  
20  
21  
22  
23  
24  
25  
26  
27  
28  
29  
30  
31  
32  
33  
34  
35  
36  
37  
38  
39  
40  
41  
42  
43  
44  
45  
46  
47  
48  
49  
50  
51  
52  
53  
54  
55  
56  
57  
58  
59  
60

For peer review only

## ARTICLE SUMMARY

### Strengths and limitations of this study

- A CEA was performed from the perspective of the Spanish National Health System comparing two interleukin-17A antagonists, ixekizumab and secukinumab
- The framework of this model is aligned with the York model; the 'gold standard' model for the economic evaluation of biologic treatments in PsA
- The current model uses a combined response criterion of PsARC and PASI to capture both joint and skin manifestations of PsA
- This analysis was limited by a lack of data available for costs and efficacy of supportive care given to PsA patients in Spain
- Due to uncertainty regarding the annual all-cause discontinuation rate, this model used assumptions consistent with previous models

## INTRODUCTION

Psoriatic arthritis (PsA) is a chronic inflammatory rheumatic disease characterised by pain, swelling and erosion of the joints.[1] PsA affects approximately 0.25% of the population worldwide [1] and 0.6% of the adult population in Spain.[2] PsA commonly co-exists with psoriasis, developing in up to 30% of psoriatic patients, and over 90% of patients with PsA will have concomitant psoriasis.[3,4] As a lifelong condition, PsA has a detrimental impact on quality of life due to pain and/or physical functional limitations associated with the disease.[1,3] It is also associated with substantial use of healthcare resources and high socioeconomic costs.[5,6]

A number of biologic disease-modifying antirheumatic drugs (bDMARDs), which inhibit key inflammatory cytokines, are approved for treating patients with PsA. Interleukin (IL)-17 has been identified as an effective target for the treatment of inflammatory diseases including PsA.[1,3] Ixekizumab, a high-affinity monoclonal antibody, is the most recently approved bDMARD targeting IL-17A for PsA, joining secukinumab, which uses the same target and similar mode of action.[7,8]

bDMARDs are considered major drivers of healthcare costs,[5] and the cost-effectiveness of these therapies often comes under scrutiny. Cost-effectiveness analyses (CEAs) comparing bDMARDs have been conducted using the York model,[9] an established economic framework, which, together with its subsequent versions, is considered the 'gold standard' for conducting CEAs in PsA.[10,11]

As inhibition of IL-17A is a relatively new mechanism of action, drugs in this class have not been the focus of CEAs.[12] To date, there are no published CEAs comparing ixekizumab with secukinumab (another IL-17A inhibitor) in Spain.

We conducted a CEA assessing the cost effectiveness, in terms of the incremental cost per quality-adjusted life-year (QALY) gained, of ixekizumab versus secukinumab in bDMARD-naïve patients with active PsA and concomitant moderate-to-severe psoriasis from the

1  
2  
3 perspective of the Spanish National Health System (NHS). Secukinumab was selected as a  
4 comparator for this CEA as both drugs belong to the same class, and this may be of interest  
5 to decision makers assessing these IL-17A inhibitors. In addition, both drugs are approved for  
6 the treatment of PsA and plaque psoriasis, and have demonstrated high efficacy, particularly  
7 on skin symptoms.[7,8] This CEA focused on bDMARD-naïve patients, as this patient  
8 population may receive greater clinical benefit from earlier (i.e. first-line) treatment.[13]  
9  
10  
11  
12  
13  
14

## 15 16 **METHODS**

### 17 18 **Model overview**

19  
20  
21  
22 A Markov model was developed to assess the cost effectiveness of ixekizumab versus  
23 secukinumab in a hypothetical cohort of bDMARD-naïve patients with active PsA and  
24 concomitant moderate-to-severe psoriasis in Spain. The Markov model framework  
25 accommodates different health states and is based on the assumption that future events  
26 depend on the current health state of the patient. The model was programmed in Visual Basics  
27 for Applications with a user interface in Microsoft® Excel.  
28  
29  
30  
31  
32  
33  
34

35  
36 The model is based on the most recent version of the York model [11] with monthly cycles and  
37 a lifetime horizon, which was considered appropriate to reflect the chronic nature of PsA as  
38 well as the treatment aim of delaying disease progression.[14] The model incorporated age-  
39 and gender-dependent mortality data for the normal Spanish population. Mean age and  
40 gender distribution was taken from the patient population in the SPIRIT-P1 and -P2 trials of  
41 ixekizumab in PsA.[15,16] Increased PsA-specific mortality risks from two different sources  
42 [17,18] were implemented in scenario analyses.  
43  
44  
45  
46  
47  
48  
49  
50

51  
52 The model includes four health states: 1) a 12- or 16-week bDMARD induction period; 2)  
53 maintenance bDMARD therapy; 3) best supportive care (BSC); and 4) death (Figure 1). A  
54 combination of Psoriatic Arthritis Response Criteria (PsARC) and Psoriasis Area Severity  
55 Index (PASI) was used to measure joint and skin response at the end of the induction period  
56 and to determine treatment continuation of ixekizumab and secukinumab (Figure 2).[19,20]  
57  
58  
59  
60

1  
2  
3 The induction period was set to 12 weeks and 16 weeks for ixekizumab and secukinumab,  
4 respectively. The induction period was chosen to reflect the time at which treatment efficacy  
5 is usually followed-up in clinical practice (approximately 3 months in Spain).[21,22] The  
6 difference in the length of induction period between the two drugs also acknowledges a degree  
7 of difference in the availability of clinical trial data for ixekizumab and secukinumab (i.e., across  
8 the included studies, more week 16 than week 12 data is available for secukinumab). The  
9 PsARC response to treatment was defined as an improvement from baseline in two of four  
10 criteria without worsening in any measure: tender/swollen joints; and physician/patient global  
11 assessment of disease activity (one of which must be a joint count). In a consensus from the  
12 Spanish Psoriasis Group, a panel of dermatologists agreed that a complete or nearly complete  
13 PASI response is the most relevant measure of effectiveness in clinical practice.[23] With this  
14 in mind,  $\geq 90\%$  improvement in PASI (PASI90) was chosen in the base-case analysis as part  
15 of the response criteria and the treatment effect measures in this model.

### 31 **Treatment sequences**

32  
33 At the end of the induction period, responders transitioned to maintenance therapy, while non-  
34 responders and discontinuers transitioned to BSC (Figure 1) in which patients were assumed  
35 to receive standard treatment depending on their Health Assessment Questionnaire –  
36 Disability Index (HAQ-DI) and PASI status.[24] Dosage regimens for ixekizumab and  
37 secukinumab were aligned with the European market authorisation.[7,8] During maintenance  
38 therapy, patients were assumed to face a constant risk of all-cause treatment discontinuation,  
39 which was reflected by an annual discontinuation rate of 16.5% in line with previously applied  
40 methods.[10,11]

41  
42 In the base-case analysis, baseline cohort characteristics were reflective of the demographic  
43 data from the ixekizumab SPIRIT-P1 and -P2 clinical trials [15,16] (Table 1).

### 56 **Treatment effect**



1  
2  
3 While PsARC and PASI90 were used as the combined response criterion (i.e. treatment  
4 continuation rule), the treatment effect was modelled as a change in baseline of the HAQ-DI  
5 and PASI scores,[25] reflecting the joint and skin components of PsA, respectively. Baseline  
6 HAQ-DI and PASI scores were derived from the SPIRIT-P1 and -P2 trials [15,16] (Table 1).  
7  
8 Treatment effect, represented by improvement (i.e. reductions) in HAQ-DI and PASI scores,  
9  
10 was assumed to be instantaneous; as such, the response was also applied during the  
11 induction period. Absolute change in HAQ-DI and PASI scores is based on data from a  
12 network meta-analysis (NMA).[25, 26] Key efficacy input data, derived from the NMA [25, 26]  
13 are provided in Supplementary Table 1.  
14  
15

16  
17 For patients who met the combined response of PsARC and PASI90 at the end of the induction  
18 period, the initial improvements in HAQ-DI and PASI continued during maintenance therapy  
19 until they transitioned into BSC. For patients entering BSC following discontinuation, it was  
20 assumed that some benefit was maintained from the initial bDMARD treatment. In the base  
21 case, for patients progressing to BSC, the HAQ-DI score was assumed to revert to the  
22 baseline HAQ-DI level prior to discontinuation (“rebound equal to initial gain”). The rebound  
23 effect was assumed to be immediate and patients were modelled to progress at the same rate  
24 as natural history progression (an increase of 0.018 per 3-month period) (Figure 3). For PASI  
25 score, it was assumed that for non-responders not meeting PASI90, there would still be some  
26 gain in PASI – albeit lower – while they were treated with a bDMARD in the induction period.  
27 Once in the BSC state, due to the progressive nature of PsA, it was assumed that patients  
28 would deteriorate at a rate of natural progression.  
29  
30  
31  
32  
33  
34  
35  
36  
37  
38  
39  
40  
41  
42  
43  
44  
45  
46  
47  
48

### 49 **Health utilities**

50  
51 Health utilities were based on HAQ-DI and PASI scores from the SPIRIT-P1 and -P2 clinical  
52 trials [15,16] with Spanish tariffs applied. Calculation of utilities followed the established  
53 methodology of mapping three-level version of EuroQol-5 Dimensions (EQ-5D-3L) utilities on  
54 HAQ and PASI scores using a parsimonious linear regression model without further covariates  
55 or interaction terms. [9–11] Alternative coefficients based on a similar algorithm using different  
56  
57  
58  
59  
60

1  
2  
3 data were applied in a sensitivity analysis. Utilities were calculated in each model cycle by  
4 multiplying HAQ and PASI levels with the estimated regression coefficients.  
5  
6

### 7 8 **Resource use and costs** 9

10  
11 As the CEA was conducted from the perspective of the Spanish NHS, only direct medical  
12 costs were considered in the model, and included medication, injection training, physician  
13 visits and therapy monitoring. Drug acquisition costs were derived from the Botplus database  
14 in Spain,[27] and costs for the administration and monitoring of treatments were obtained from  
15 various sources in Spain [28] (Table 2). Drug costs were based on the list prices as of Q4  
16 2018. Monitoring costs were based on the costing schedule published in 2017, which was still  
17 valid in 2018. Due to a lack of healthcare resource utilisation data by drug or class, healthcare  
18 costs and resource utilisation related to the administration and monitoring of bDMARDs was  
19 determined by an expert panel of four Spanish physicians (two rheumatologists and two  
20 dermatologists).  
21  
22  
23  
24  
25  
26  
27  
28  
29  
30  
31  
32

33 The severity of arthritis and psoriasis also may have an impact on healthcare costs.[10,11] To  
34 reflect this, costs related to HAQ-DI and PASI were also included per cycle in the  
35 model.[10,24] These costs were derived by converting and inflating results of established  
36 algorithms, which relate cost to absolute HAQ-DI and PASI values.  
37  
38  
39  
40  
41

42 Aside from costs related to HAQ-DI and PASI, no additional costs were applied for patients in  
43 BSC. The costs of serious adverse events (i.e. requiring hospitalisation) associated with  
44 bDMARD treatment were not included in the base-case analysis, but they were included in a  
45 sensitivity analysis. The rates of adverse events were derived from the summary of product  
46 characteristics of ixekizumab and secukinumab.[7,8]  
47  
48  
49  
50  
51  
52

### 53 **Sensitivity analyses** 54

55  
56 To explore the uncertainty inherent in the model, one-way (deterministic) sensitivity analysis,  
57 probabilistic sensitivity analysis and scenario analyses were undertaken. In the one-way  
58  
59  
60

1  
2  
3 sensitivity analysis, one variable at a time was altered to examine the effect on the results.  
4  
5 Most input parameters varied by  $\pm 20\%$  of the mean value, as 95% confidence interval (CI)  
6  
7 values were not available. Exceptions to this included ranges of values used for the annual  
8  
9 discontinuation rate (95% CI); discount rates for costs and health utilities (0%; 5%); treatment  
10  
11 efficacy ( $\pm 10\%$  of the mean value); HAQ-DI improvement conditional on response (NMA  
12  
13 results); physician and monitoring costs ( $\pm 1$  visit); and utility equations for PASI and HAQ-DI  
14  
15 coefficients.  
16

17  
18 A probabilistic sensitivity analysis was conducted by assigning distributions to input  
19  
20 parameters (Supplementary Table 2) and sampling from these distributions in 1000 iterations.  
21  
22 For efficacy inputs, the convergence diagnostics and output analysis (CODA) of the Bayesian  
23  
24 NMA was used instead of applying parametric distributions, in line with internationally  
25  
26 recognised technical guidance.[29] The input parameters included PsARC and PASI response  
27  
28 rates, changes in HAQ-DI based on response criterion, costs based on HAQ-DI and PASI,  
29  
30 discontinuation rates, various healthcare-related costs and the use of resources.  
31  
32

33  
34 A scenario analysis was conducted using a 10-year time horizon and alternative inputs for  
35  
36 discount rates, increased PsA mortality, the definition of responders, the HAQ-DI rebound  
37  
38 method, the utility equation, health state costs and placebo efficacy in BSC.  
39  
40

### 41 **Patient and public involvement**

42  
43  
44 Patients or the public were not involved in the design, planning or execution of this work.  
45

### 46 **RESULTS**

47  
48  
49 Results of the base-case analysis in bDMARD-naïve patients with PsA and concomitant  
50  
51 moderate-to-severe psoriasis are summarised in Table 3. Ixekizumab was associated with  
52  
53 total cost savings of €2,658 compared with secukinumab (total costs €153,901 vs €156,559).  
54  
55 Total QALYs were higher for ixekizumab (9.175 vs 9.082, difference 0.093). Although  
56  
57  
58  
59  
60

ixekizumab performed favourably over secukinumab in the base-case analysis, cost savings and QALY gains were modest.

The deterministic sensitivity analysis showed that base-case results were generally robust to changes in most input parameters, but were most sensitive to the annual discontinuation rate for bDMARD therapy and modifications in PsARC and PASI90 response to ixekizumab or secukinumab (Figure 4).

The probabilistic sensitivity analysis showed that approximately 49.5% of observations were in the south-east quadrant, indicating that ixekizumab was still less costly and provided more QALYs than secukinumab (Figure 5). Across the cost-effectiveness plane, 99% of replications were located south-east of the line defined by a willingness to pay threshold of €30,000 per QALY gained.

Overall, the scenario analyses showed that most of the parameters tested had relatively little impact on the base-case results (Figure 6). In most scenarios, ixekizumab provided more QALYs at a lower cost than secukinumab. While there was some variability regarding incremental cost and QALYs between ixekizumab versus secukinumab, in all scenarios the mean results still indicated the dominance of ixekizumab over secukinumab.

## DISCUSSION

In this CEA, the cost effectiveness of ixekizumab compared to secukinumab was evaluated in bDMARD-naïve patients with active PsA and concomitant moderate-to-severe psoriasis from the perspective of the Spanish NHS. In general, ixekizumab performed favourably compared to secukinumab in the base-case analysis, with differences in cost savings and QALY gains being modest. The total difference in cost between ixekizumab and secukinumab was -€2,658, with a small total difference in QALYs of 0.093. In the deterministic sensitivity analysis, the most influential variables were the annual discontinuation rate and the PsARC and PASI90 response for ixekizumab and secukinumab.

1  
2  
3 The framework of this model is closely aligned with the most recently revised version of the  
4 York model,[11] which is considered a 'benchmark' model for the economic evaluation of  
5 biologic treatments in PsA. The original York model has subsequently been revised to  
6 accommodate the analysis of patient subgroups. The model used in this analysis includes this  
7 amendment as a key feature. The current model also allows for combining PsARC and PASI  
8 as a response criterion, therefore capturing both joint and skin response. A combined  
9 response criterion presents a more realistic representation of this multifaceted disease and  
10 may be especially useful when evaluating clinical benefits of bDMARDs, such as IL-17A  
11 antagonists, which are known for their proven efficacy on skin response.[30,31]  
12  
13  
14  
15  
16  
17  
18  
19  
20  
21  
22

23 A limitation of this analysis was a lack of current data for health state cost estimates and the  
24 efficacy of BSC. There is also uncertainty regarding the annual all-cause discontinuation rate;  
25 therefore, our model used input data consistent with previously applied methods.[10,11] Given  
26 the sensitivity of the results to this parameter, correction or confirmation of the current  
27 assumptions based on mature real-world drug survival data is a clear research need for the  
28 future.  
29  
30  
31  
32  
33  
34  
35

36 In addition, the actual acquisition costs of bDMARDs in clinical practice tend to differ from list  
37 prices because any confidential discounts are unknown and therefore cannot be reflected in  
38 the analyses. Therefore, the respective differences in drug prices in clinical practice would  
39 also affect the true cost differences between treatment arms in the analysis.  
40  
41  
42  
43  
44  
45  
46  
47  
48  
49  
50  
51  
52  
53  
54  
55  
56  
57  
58  
59  
60

## CONCLUSION

In this CEA of ixekizumab versus secukinumab in bDMARD-naïve patients with PsA and concomitant moderate-to-severe psoriasis in Spain, ixekizumab provided more QALYs at a lower cost, with differences being on a relatively small scale. As differences in total costs and QALYs were modest, other factors, such as patient preferences, may also be considered during clinical decision making. Base-case results were generally robust to modifications in most input parameters, but were most sensitive to the annual bDMARD discontinuation rate and variations in PsARC and PASI90 response to ixekizumab or secukinumab.

## ACKNOWLEDGMENTS

The authors would like to acknowledge Elinor Wylde and Greg Plosker (Rx Communications, Mold, UK) for medical writing assistance with the preparation of this manuscript, funded by Eli Lilly.

## FUNDING

This study was funded by Eli Lilly and Company.

## CONFLICTS OF INTEREST

**BS** and **CM** are full-time employees of ICON who were commissioned by Eli Lilly and Company to conduct the analysis for this work. **MN**, **TD**, **CS** and **SH** are full-time employees of Eli Lilly and Company; they receive a salary and own company stock.

## AUTHOR CONTRIBUTIONS

**BS** and **CM** were involved with the conception and design of the work, and the interpretation of the data. **MN** and **CS** were involved with the acquisition and interpretation of the data. **TD** was involved with the conception of the work and interpretation of the data. **SH** was involved with the interpretation of the data. All named have provided critical revision of the manuscript for important intellectual content and have given their approval for this version to be published. All authors had full access to all of the data in this study and take complete responsibility for the integrity of the data and accuracy of the data analysis.

## DATA SHARING STATEMENT

All data relevant to the study are included in the article or uploaded as supplementary information.

## REFERENCES

1. McArdle A, Pennington S, FitzGerald O. Clinical features of psoriatic arthritis: a comprehensive review of unmet clinical needs. *Clin Rev Allergy Immunol* 2018;55:271–94.
2. Seoane-Mato D, Sánchez-Piedra C, Díaz-González F, et al. THU0684 Prevalence of rheumatic diseases in adult population in Spain. Episer 2016 study. *Ann Rheum Dis* 2018;77:535–36.
3. Ritchlin CT, Colbert RA, Gladman DD. Psoriatic arthritis. *N Engl J Med* 2017;376:957–70.
4. Ciocon DH, Kimball AB. Psoriasis and psoriatic arthritis: separate or one and the same? *Br J Dermatol* 2007;157(5):850–60.
5. D'Angiolella LS, Cortesi PA, Lafranconi A, et al. Cost and cost effectiveness of treatments for psoriatic arthritis: a systematic literature review. *Pharmacoeconomics* 2018;36:567–89.
6. Kawalec P, Malinowski KP. The indirect costs of psoriatic arthritis: systematic review and meta-analysis. *Expert Rev Pharmacoecon Outcomes Res* 2015;15:125–32.
7. European Medicines Agency. Ixekizumab (Taltz): Summary of product characteristics 2016. [www.ema.europa.eu/documents/product-information/taltz-epar-product-information\\_en.pdf](http://www.ema.europa.eu/documents/product-information/taltz-epar-product-information_en.pdf) (accessed 22 Mar 2019).
8. European Medicines Agency. Secukinumab (Cosentyx): Summary of product characteristics 2015. [www.ema.europa.eu/documents/product-information/cosentyx-epar-product-information\\_en.pdf](http://www.ema.europa.eu/documents/product-information/cosentyx-epar-product-information_en.pdf) (accessed 22 Mar 2019).
9. Woolacott N, Bravo Vergel Y, Hawkins N, et al. Etanercept and infliximab for the treatment of psoriatic arthritis: a systematic review and economic evaluation. *Health Technol Assess* 2006;10:iii–iv, xiii–xvi, 1–239.



10. Rodgers M, Epstein D, Bojke L, et al. Etanercept, infliximab and adalimumab for the treatment of psoriatic arthritis: a systematic review and economic evaluation. *Health Technol Assess* 2011;15:i–xxi, 1–329.
11. Corbett M, Chehadah F, Biswas M, et al. Certolizumab pegol and secukinumab for treating active psoriatic arthritis following inadequate response to disease-modifying antirheumatic drugs: a systematic review and economic evaluation. *Health Technol Assess* 2017;21:1–326.
12. Wasilewska A, Winiarska M, Olszewska M, et al. Interleukin-17 inhibitors. A new era in treatment of psoriasis and other skin diseases. *Postepy Dermatol Alergol* 2016;33:247–52.
13. Raychaudhuri SP, Wilken R, Sukhov AC, et al. Management of psoriatic arthritis: Early diagnosis, monitoring of disease severity and cutting edge therapies. *J Autoimmun* 2017;76:21–37.
14. Mease PJ, Armstrong AW. Managing patients with psoriatic disease: the diagnosis and pharmacologic treatment of psoriatic arthritis in patients with psoriasis. *Drugs* 2014;74:423–41.
15. Mease PJ, van der Heijde D, Ritchlin CT, et al. Ixekizumab, an interleukin-17A specific monoclonal antibody, for the treatment of biologic-naïve patients with active psoriatic arthritis: results from the 24-week randomised, double-blind, placebo-controlled and active (adalimumab)-controlled period of the phase III trial SPIRIT-P1. *Ann Rheum Dis* 2017;76:79–87.
16. Nash P, Kirkham B, Okada M, et al. Ixekizumab for the treatment of patients with active psoriatic arthritis and an inadequate response to tumour necrosis factor inhibitors: results from the 24-week randomised, double-blind, placebo-controlled period of the SPIRIT-P2 phase 3 trial. *Lancet* 2017;389:2317–27.
17. Ali Y, Tom BD, Schentag CT, et al. Improved survival in psoriatic arthritis with calendar time. *Arthritis Rheum* 2007;56:2708–14.

- 1  
2  
3 18. Wong K, Gladman DD, Husted J, et al. Mortality studies in psoriatic arthritis: results  
4 from a single outpatient clinic. I. Causes and risk of death. *Arthritis Rheum*  
5 1997;40:1868–72.  
6  
7  
8  
9 19. Mease PJ, Antoni CE, Gladman DD, et al. Psoriatic arthritis assessment tools in clinical  
10 trials. *Ann Rheum Dis* 2005;64:ii49–54.  
11  
12  
13 20. Fransen J, Antoni C, Mease PJ, et al. Performance of response criteria for assessing  
14 peripheral arthritis in patients with psoriatic arthritis: analysis of data from randomised  
15 controlled trials of two tumour necrosis factor inhibitors. *Ann Rheum Dis*  
16 2006;65:1373–8.  
17  
18  
19 21. Torre Alonso JC, Díaz Del Campo Fontecha P, Almodóvar R, et al. Recommendations  
20 of the Spanish Society of Rheumatology on treatment and use of systemic biological  
21 and non-biological therapies in psoriatic arthritis. *Reumatol Clin* 2018;14:254–68.  
22  
23  
24 22. Ruiz-Villaverde R, Rodriguez-Fernandez-Freire L, Galán-Gutierrez M, et al. Eficacia  
25 del secukinumab en psoriasis y artritis psoriásica: estudio multicéntrico retrospectivo.  
26 *Med Clin (Barc)* 2019; pii:S0025-7753(19)30006-5  
27 doi.org/10.1016/j.medcli.2018.12.009  
28  
29  
30 23. Carretero G, Puig L, Carrascosa JM, et al. Redefining the therapeutic objective in  
31 psoriatic patient candidates for biological therapy. *J Dermatolog Treat* 2018;29:334–  
32 46.  
33  
34  
35 24. Kobelt G, Jönsson L, Lindgren P, et al. Modeling the progression of rheumatoid  
36 arthritis: a two-country model to estimate costs and consequences of rheumatoid  
37 arthritis. *Arthritis Rheum* 2002;46:2310–19.  
38  
39  
40 25. Ruysen-Witrand A, Perry R, Watkins C, et al. Efficacy and safety of biologics in  
41 psoriatic arthritis: a systematic literature review and network meta-analysis. *RMD*  
42 *Open* 2020;6:e001117.  
43  
44  
45 26. Ruysen-Witrand A, Sapin C, Hartz S, et al. THU0290 Effects of biologic dmards on  
46 physical function in patients with active psoriatic arthritis: results of network meta-  
47 analyses. *Ann Rheum Dis* 2018;77:363–4.  
48  
49  
50  
51  
52  
53  
54  
55  
56  
57  
58  
59  
60

- 1  
2  
3 27. Consejo General de Colegios Oficiales de Farmacéuticos. Botplus database 2018.  
4  
5 <https://botplusweb.portalfarma.com/botplus.aspx> (accessed 22 Mar 2019).  
6  
7 28. Oblikue Consulting. Base de datos de costes sanitarios españoles: eSalud 2007.  
8  
9 <http://www.oblikue.com/bddcostes/> (accessed 22 Mar 2019).  
10  
11 29. Dias S, Sutton AJ, Welton NJ, et al. Evidence synthesis for decision making 6:  
12 embedding evidence synthesis in probabilistic cost-effectiveness analysis. *Med Decis*  
13 *Making* 2013;33:671–8.  
14  
15 30. Betteridge N, Boehncke WH, Bundy C, et al. Promoting patient-centred care in  
16 psoriatic arthritis: a multidisciplinary European perspective on improving the patient  
17 experience. *J Eur Acad Dermatol Venereol* 2016;30:576–85.  
18  
19 31. Gottlieb AB, Strand V, Kishimoto M, et al. Ixekizumab improves patient-reported  
20 outcomes up to 52 weeks in bDMARD-naïve patients with active psoriatic arthritis  
21 (SPIRIT-P1). *Rheumatology (Oxford)* 2018;57:1777–88.  
22  
23  
24  
25  
26  
27  
28  
29  
30  
31  
32  
33  
34  
35  
36  
37  
38  
39  
40  
41  
42  
43  
44  
45  
46  
47  
48  
49  
50  
51  
52  
53  
54  
55  
56  
57  
58  
59  
60

**Table 1.** Characteristics of the target population of bDMARD-naïve patients with PsA and concomitant moderate-to-severe psoriasis based on the ixekizumab SPIRIT-P1 and -P2 clinical trials.

| Parameter             | Mean value |
|-----------------------|------------|
| Age                   | 51.0 years |
| Proportion male       | 51.8%      |
| Proportion female     | 48.2%      |
| Body weight           | 87.0 kg    |
| Baseline HAQ-DI score | 1.19       |
| Baseline PASI score   | 20.4       |

Patient characteristics based on pooled data from the intent-to-treat trial populations of SPIRIT-P1 and -P2 with ixekizumab. [15,16]

bDMARD, biologic disease-modifying anti-rheumatic drug; HAQ-DI, Health Assessment Questionnaire – Disability Index; PASI, Psoriasis Area Severity Index; PsA, psoriatic arthritis.

**Table 2.** Costs for administration and monitoring of treatment in Spain.

| Resource                                    | Cost               | Source                                                                                |
|---------------------------------------------|--------------------|---------------------------------------------------------------------------------------|
| <i>Drug acquisition costs (list prices)</i> |                    |                                                                                       |
| Ixekizumab 80 mg Q4W pre-filled pen         | €934.25 per dose   | Botplus database [27] minus rebate of 7.5% according to Spanish regulation RDL 8/2010 |
| Secukinumab 300 mg pre-filled pen           | €1,057.38 per dose | Botplus database [27] minus rebate of 7.5% according to Spanish regulation RDL 8/2010 |
| <i>Visits</i>                               |                    |                                                                                       |
| Rheumatologist                              | €220.62            | Base de datos de costes sanitarios españoles [28]                                     |
| Dermatologist                               | €100.58            | Base de datos de costes sanitarios españoles [28]                                     |
| GP                                          | €33.86             | Base de datos de costes sanitarios españoles [28]                                     |
| <i>Monitoring</i>                           |                    |                                                                                       |
| Full blood count                            | €67.98             | Base de datos de costes sanitarios españoles [28]                                     |
| Erythrocyte sedimentation rate              | €1.03              | Base de datos de costes sanitarios españoles [28]                                     |
| Chest X-ray                                 | €42.23             | Base de datos de costes sanitarios españoles [28]                                     |
| Tuberculosis test                           | €8.95              | Base de datos de costes sanitarios españoles [28]                                     |
| C-reactive protein test                     | €8.95              | Base de datos de costes sanitarios españoles [28]                                     |

GP, general practitioner; Q4W, every four weeks.

**Table 3.** Results of the base-case analysis comparing ixekizumab and secukinumab in bDMARD-naïve patients with active PsA and concomitant moderate-to-severe psoriasis.

| Parameter                              | Ixekizumab | Secukinumab | Difference |
|----------------------------------------|------------|-------------|------------|
| <i>Costs (year 2018 values)</i>        |            |             |            |
| Total costs                            | €153,901   | €156,559    | -€2,658    |
| Treatment costs                        | €26,424    | €27,729     | -€1,305    |
| Administration costs                   | €26        | €24         | €2         |
| Physician visit costs                  | €4,141     | €4,202      | -€61       |
| Monitoring costs                       | €797       | €706        | €92        |
| On treatment HAQ-DI/PASI-related costs | €4,608     | €4,115      | €494       |
| BSC costs                              | €117,904   | €119,784    | -€1,880    |
| <i>QALYs</i>                           |            |             |            |
| Total QALYs                            | 9.175      | 9.082       | 0.093      |

BSC, best supportive care; HAQ-DI, Health Assessment Questionnaire – Disability Index; PASI, Psoriasis Area Severity Index; PsA, psoriatic arthritis; QALYs, quality-adjusted life-years.

## Figure Legends and abbreviations

**Figure 1.** Schematic representation of the model structure in bDMARD-naïve patients with active PsA and concomitant moderate-to-severe psoriasis. Dosage regimens were aligned with the European market authorisation. Although not shown in the figure, patients could transition to death from any state.

BSC, best supportive care; bDMARD, biologic disease-modifying anti-rheumatic drug; PsA, psoriatic arthritis; Q4W, every 4 weeks.

**Figure 2.** A combination of PsARC response and  $\geq 90\%$  improvement in PASI (PASI90) was used to capture both joint and skin response at the end of the induction period.

**Figure 3.** Scenarios for HAQ-DI rebound after the discontinuation of treatment.

HAQ-DI, Health Assessment Questionnaire – Disability Index.

**Figure 4.** Results of the one-way sensitivity analysis in bDMARD-naïve patients with PsA and concomitant moderate-to-severe psoriasis.

bDMARD, biologic disease-modifying anti-rheumatic drug; CI, confidence interval; FBC, full blood count; HAQ-DI, Health Assessment Questionnaire-Disability Index; ICER, incremental cost-effectiveness ratio; Ixe, ixekizumab; p.a., per annum; PASI90,  $\geq 90\%$  reduction from baseline Psoriasis Area Severity Index score; PsA, psoriatic arthritis; PsARC, Psoriatic Arthritis Response Criteria; QALY, quality-adjusted life-year; Q4W, every 4 weeks; SE, standard error; Sec, secukinumab; Trt, treatment.

1  
2  
3 **Figure 5.** Results of the probabilistic sensitivity analysis in bDMARD-naïve patients with PsA  
4 and concomitant moderate-to-severe psoriasis. Approximately 49.5% of observations were in  
5 the south-east quadrant, 28.6% were in the south-west quadrant and 21.9% were in the north-  
6 east quadrant of the cost-effectiveness plane.  
7  
8  
9

10  
11 bDMARD, biologic disease-modifying anti-rheumatic drug; Ixe, ixekizumab; PsA, psoriatic  
12 arthritis; QALY, quality-adjusted life-year; Q4W, every 4 weeks; Sec, secukinumab; WTP,  
13 willingness to pay.  
14  
15  
16  
17

18  
19  
20 **Figure 6.** Results of scenario analyses in bDMARD-naïve patients with PsA and concomitant  
21 moderate-to-severe psoriasis.  
22

23 bDMARD, biologic disease-modifying anti-rheumatic drug; PASI75,  $\geq 75\%$  reduction in  
24 Psoriasis Area Severity Index score; PASI100, 100% reduction in PASI score; PsA, psoriatic  
25 arthritis; PsARC, Psoriatic Arthritis Response Criteria; QALY, quality-adjusted life-year; Resp,  
26 response; yrs, years.  
27  
28  
29  
30  
31  
32  
33  
34  
35  
36  
37  
38  
39  
40  
41  
42  
43  
44  
45  
46  
47  
48  
49  
50  
51  
52  
53  
54  
55  
56  
57  
58  
59  
60



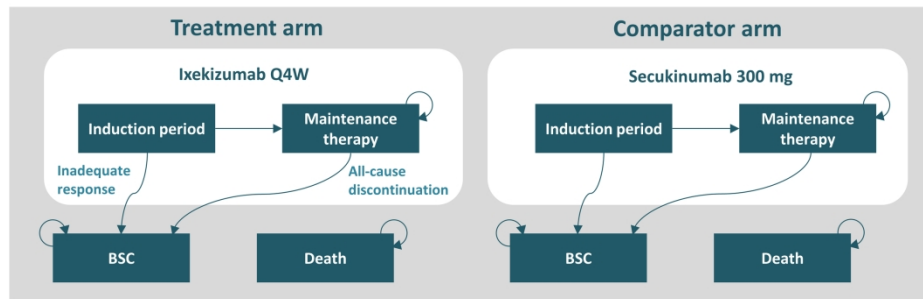

Figure 1. Schematic representation of the model structure in bDMARD-naïve patients with active PsA and concomitant moderate-to-severe psoriasis. Dosage regimens were aligned with the European market authorisation. Although not shown in the figure, patients could transition to death from any state.

228x75mm (300 x 300 DPI)

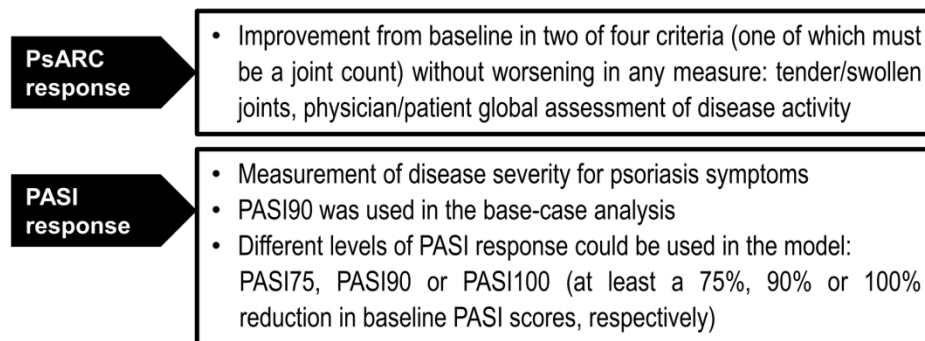

Figure 2. A combination of PsARC response and  $\geq 90\%$  improvement in PASI (PASI90) was used to capture both joint and skin response at the end of the induction period.

178x70mm (300 x 300 DPI)

1  
2  
3  
4  
5  
6  
7  
8  
9  
10  
11  
12  
13  
14  
15  
16  
17  
18  
19  
20  
21  
22  
23  
24  
25  
26  
27  
28  
29  
30  
31  
32  
33  
34  
35  
36  
37  
38  
39  
40  
41  
42  
43  
44  
45  
46  
47  
48  
49  
50  
51  
52  
53  
54  
55  
56  
57  
58  
59  
60

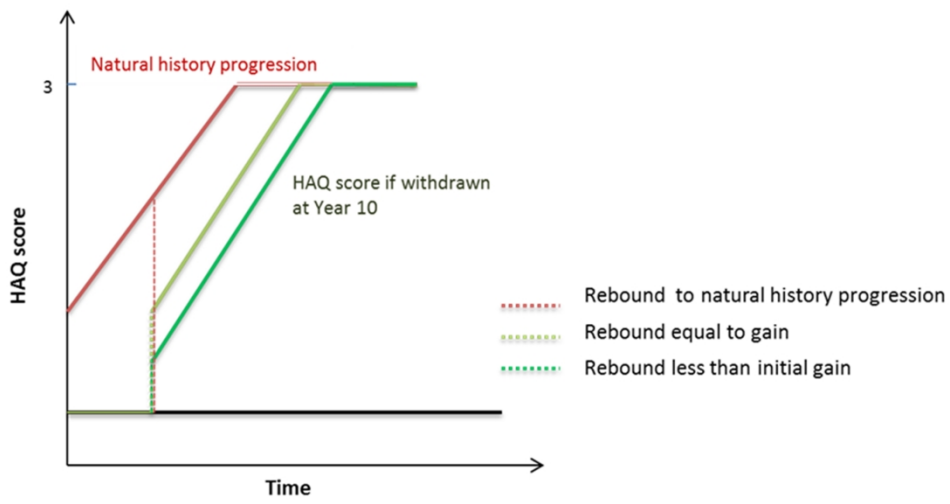

Figure 3. Scenarios for HAQ-DI rebound after the discontinuation of treatment.

228x120mm (600 x 600 DPI)

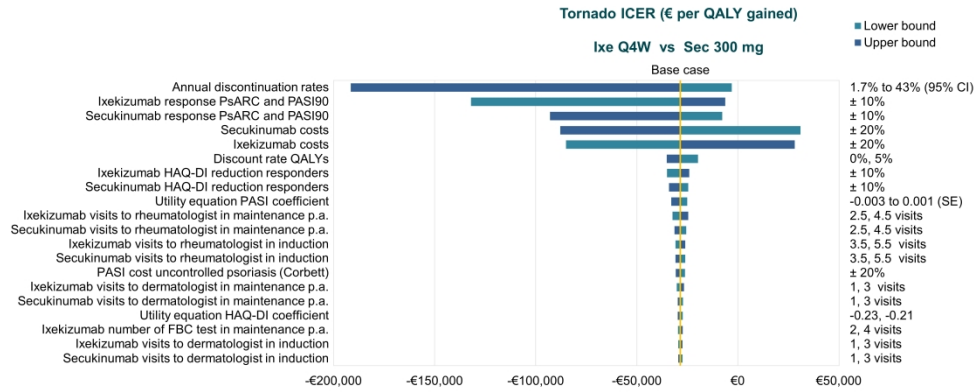

Figure 4. Results of the one-way sensitivity analysis in bDMARD-naïve patients with PsA and concomitant moderate-to-severe psoriasis.

338x140mm (300 x 300 DPI)

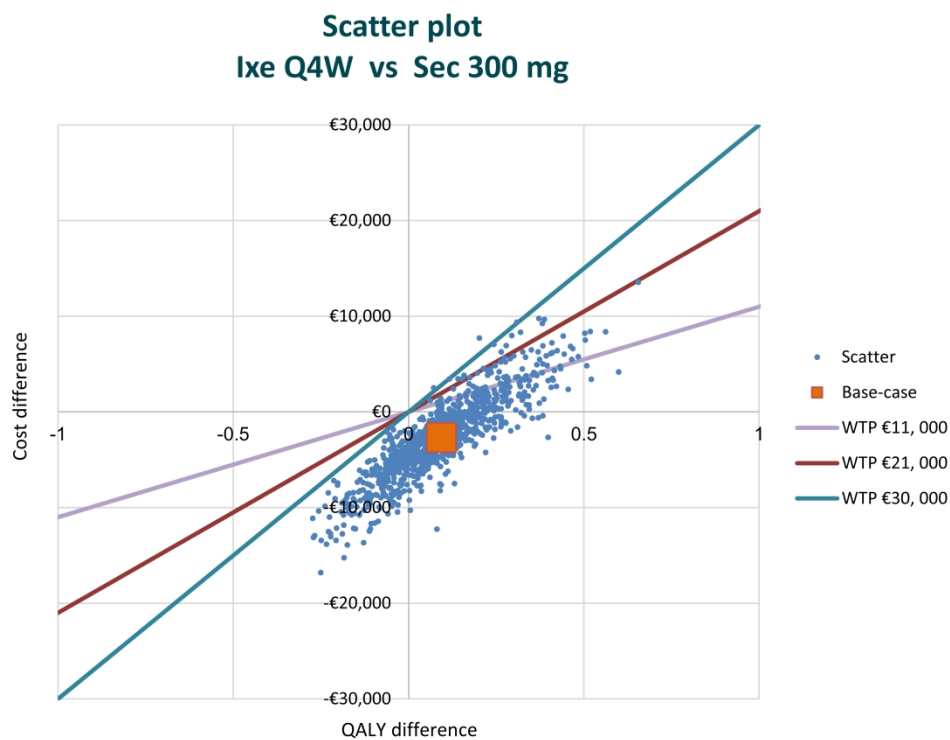

31  
32  
33  
34  
35

Figure 5. Results of the probabilistic sensitivity analysis in bDMARD-naïve patients with PsA and concomitant moderate-to-severe psoriasis. Approximately 49.5% of observations were in the south-east quadrant, 28.6% were in the south-west quadrant and 21.9% were in the north-east quadrant of the cost-effectiveness plane.

36  
37  
38  
39  
40  
41  
42  
43  
44  
45  
46  
47  
48  
49  
50  
51  
52  
53  
54  
55  
56  
57  
58  
59  
60

168x130mm (600 x 600 DPI)

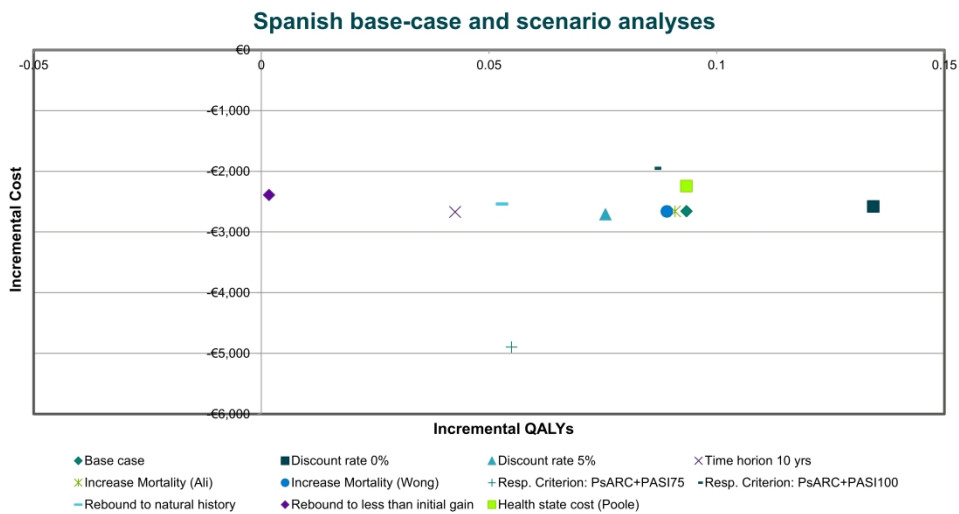

Figure 6. Results of scenario analyses in bDMARD-naïve patients with PsA and concomitant moderate-to-severe psoriasis.

273x145mm (600 x 600 DPI)

## BMJ Open

**Cost-effectiveness analysis of ixekizumab versus secukinumab in patients with psoriatic arthritis and concomitant moderate-to-severe psoriasis in Spain**

Bernd Schweikert, Chiara Malmberg, Mercedes Nuñez, Tatiana Dilla, Christophe Sapin, Susanne Hartz

**Corresponding Author:** Dr. Bernd Schweikert

ICON plc, Konrad-Zuse-Platz 11, 81829 Munich, Germany

bernd.schweikert@iconplc.com

**Supplementary Table 1.** Efficacy input data used in the base-case analysis based on data from a related network meta-analysis. [23, 24]

| Treatment     | Probability of response for chosen criterion |                    | HAQ reduction |                | PASI response      |                    |                    | PASI reduction |                |
|---------------|----------------------------------------------|--------------------|---------------|----------------|--------------------|--------------------|--------------------|----------------|----------------|
|               | PsARC                                        | PsARC and PASI90   | Responders    | Non-responders | PASI75             | PASI90             | PASI100            | Responders     | Non-responders |
| Ixe 80 mg Q4W | 53.0%                                        | 34.4%              | 0.51          | 0.05           | 70.9%              | 52.0%              | 35.4%              | 18.36          | 9.49           |
| Sec 300 mg    | 54.1% <sup>a</sup>                           | 26.5% <sup>a</sup> | 0.56          | 0.14           | 56.6% <sup>a</sup> | 36.8% <sup>a</sup> | 22.4% <sup>a</sup> | 18.36          | 8.13           |

<sup>a</sup>Data derived from a mixed population of bDMARD-naïve and -experienced patients (due to lack of data reported specifically for bDMARD-naïve patients).

DMARD, biologic disease-modifying anti-rheumatic drug; HAQ, Health Assessment Questionnaire; Ixe, ixekizumab, PASI, Psoriasis Area and Severity Index; PASI75, 90, 100, ≥75%, ≥90% or 100% reduction from baseline PASI; PsARC, Psoriatic Arthritis Response Criteria; Q4W, every 4 weeks; Sec, secukinumab.

## BMJ Open

**Cost-effectiveness analysis of ixekizumab versus secukinumab in patients with psoriatic arthritis and concomitant moderate-to-severe psoriasis in Spain**

Bernd Schweikert, Chiara Malmberg, Mercedes Nuñez, Tatiana Dilla, Christophe Sapin, Susanne Hartz

**Corresponding Author:** Dr. Bernd Schweikert

ICON plc, Konrad-Zuse-Platz 11, 81829 Munich, Germany

bernd.schweikert@iconplc.com

**Supplementary Table 2.** Parameters used in the probabilistic sensitivity analysis

| Parameter                             | Mean (SE)         | Distribution type | CI/assumptions         |
|---------------------------------------|-------------------|-------------------|------------------------|
| <i>Utility regression calculation</i> |                   |                   |                        |
| Intercept                             | 0.903 (0.009)     | BETA              |                        |
| HAQ                                   | -0.219 (0.010)    | NORMAL            |                        |
| PASI                                  | -0.001 (0.002)    | NORMAL            |                        |
| Annual HAQ progression                | 0.072 (0.018)     | GAMMA             | Assumption SE=mean/4   |
| Annual discontinuation rate           | 0.165 (0.041)     | BETA              | Assumption SE=mean/4   |
| Mean weight                           | 87.02 (0.454)     | NORMAL            | Based on SPIRIT trials |
| Additional annual cost of BSC         | 0.00 (0.000)      | GAMMA             | Assumption SE=mean/4   |
| <i>Monitoring Costs</i>               |                   |                   |                        |
| Cost of full blood count              | 67.98 (17.0)      | GAMMA             | Assumption SE=mean/4   |
| Cost of liver function test           | 5.9566 (1.5)      | GAMMA             | Assumption SE=mean/4   |
| Cost of ESR                           | 1.03 (0.3)        | GAMMA             | Assumption SE=mean/4   |
| Cost of urea and electrolytes test    | 75.8183 (19.0)    | GAMMA             | Assumption SE=mean/4   |
| Cost of X-Ray                         | 42.23 (10.6)      | GAMMA             | Assumption SE=mean/4   |
| Cost of TB test                       | 8.95 (2.2)        | GAMMA             | Assumption SE=mean/4   |
| Cost of ANA test                      | 8.9507 (2.2)      | GAMMA             | Assumption SE=mean/4   |
| Cost of dsDNA test                    | 0 (0.0)           | GAMMA             | Assumption SE=mean/4   |
| <i>Admin costs</i>                    |                   |                   |                        |
| Cost of subcutaneous injection        | 1.11 (0.3)        | GAMMA             | Assumption SE=mean/4   |
| Cost of intravenous infusion          | 81.82 (20.5)      | GAMMA             | Assumption SE=mean/4   |
| <i>Physician costs</i>                |                   |                   |                        |
| Cost of rheumatologist visit          | 220.62 (55.2)     | GAMMA             | Assumption SE=mean/4   |
| Cost of dermatologist visit           | 100.58 (25.1)     | GAMMA             | Assumption SE=mean/4   |
| Cost of GP visit                      | 33.86 (8.5)       | GAMMA             | Assumption SE=mean/4   |
| <i>AEs hospital costs</i>             |                   |                   |                        |
| NMSC                                  | 3858.07 (964.5)   | GAMMA             | Assumption SE=mean/4   |
| Lymphoma                              | 10345.71 (2586.4) | GAMMA             | Assumption SE=mean/4   |
| Melanoma                              | 3966.44 (991.6)   | GAMMA             | Assumption SE=mean/4   |
| Sepsis                                | 7769.76 (1942.4)  | GAMMA             | Assumption SE=mean/4   |



|                                                  |                  |        |                      |
|--------------------------------------------------|------------------|--------|----------------------|
| TB                                               | 7110.13 (1777.5) | GAMMA  | Assumption SE=mean/4 |
| Pneumonia                                        | 4558.02 (1139.5) | GAMMA  | Assumption SE=mean/4 |
| Skin and soft tissue infection                   | 4171.03 (1042.8) | GAMMA  | Assumption SE=mean/4 |
| one and joint infection                          | 7245.83 (1811.5) | GAMMA  | Assumption SE=mean/4 |
| Urinary tract infection                          | 3347.43 (836.9)  | GAMMA  | Assumption SE=mean/4 |
| <i>Health state costs</i>                        |                  |        |                      |
| Kobelt HAQ regression constant                   | 636.56 (410.7)   | NORMAL | Kobelt               |
| Kobelt HAQ regression intercept                  | 2101.70 (739.7)  | NORMAL | Kobelt               |
| Corbett PASI cost uncontrolled psoriasis         | 2871.95 (718.0)  | GAMMA  | Assumption SE=mean/4 |
| Corbett PASI cost controlled psoriasis           | 81.03 (2.03)     | GAMMA  | Assumption SE=mean/4 |
| Kobelt cost adjustment factor                    | 0.85 (0.2)       | BETA   | Assumption SE=mean/4 |
| <i>Efficacy of BSC</i>                           |                  |        |                      |
| PsARC                                            | 30.60%           | CODA   |                      |
| PsARC and PASI75                                 | 5.04%            | CODA   |                      |
| PsARC and PASI90                                 | 1.77%            | CODA   |                      |
| PsARC and PASI100                                | 0.61%            | CODA   |                      |
| HAQ reduction responders                         | 0.257            | CODA   |                      |
| HAQ reduction non-responders                     | -0.009           | CODA   |                      |
| PASI50 response                                  | 17.40%           | CODA   |                      |
| PASI75 response                                  | 6.40%            | CODA   |                      |
| PASI90 response                                  | 2.20%            | CODA   |                      |
| PASI100 response                                 | 0.70%            | CODA   |                      |
| <i>Treatment specific costs - Ixekizumab Q4W</i> |                  |        |                      |
| PsARC                                            | 53.00%           | CODA   |                      |
| PsARC and PASI75                                 | 46.65%           | CODA   |                      |
| PsARC and PASI90                                 | 34.40%           | CODA   |                      |
| PsARC and PASI 100                               | 23.01%           | CODA   |                      |
| HAQ reduction responders                         | 0.506            | CODA   |                      |
| HAQ reduction non-responders                     | 0.052            | CODA   |                      |
| PASI50 response                                  | 87.20%           | CODA   |                      |
| PASI75 response                                  | 70.90%           | CODA   |                      |
| PASI90 response                                  | 52.00%           | CODA   |                      |
| PASI100 response                                 | 35.40%           | CODA   |                      |
| <i>Physician Visits - Induction period</i>       |                  |        |                      |
| Rheumatologist                                   | 4.50 (1.125)     | GAMMA  | Assumption SE=mean/4 |
| Dermatologist                                    | 6.00 (1.50)      | GAMMA  | Assumption SE=mean/4 |
| GP                                               | 10.80 (2.70)     | GAMMA  | Assumption SE=mean/4 |
| <i>Physician Visits - Maintenance therapy</i>    |                  |        |                      |
| Rheumatologist (annually)                        | 3.50 (0.875)     | GAMMA  | Assumption SE=mean/4 |
| Dermatologist (annually)                         | 2.00 (0.50)      | GAMMA  | Assumption SE=mean/4 |
| GP (annually)                                    | 10.80 (2.70)     | GAMMA  | Assumption SE=mean/4 |
| <i>Monitoring - Induction period</i>             |                  |        |                      |
| Number of FBC                                    | 4.50 (1.125)     | GAMMA  | Assumption SE=mean/4 |
| Number of LFT                                    | 0.00 (0.000)     | GAMMA  | Assumption SE=mean/4 |
| Number of ESR                                    | 4.50 (1.125)     | GAMMA  | Assumption SE=mean/4 |
| Number of U&E                                    | 0.00 (0.000)     | GAMMA  | Assumption SE=mean/4 |
| Number of X-Ray                                  | 1.00 (0.250)     | GAMMA  | Assumption SE=mean/4 |

|                                                      |              |       |                      |
|------------------------------------------------------|--------------|-------|----------------------|
| Number of TB test                                    | 1.00 (0.250) | GAMMA | Assumption SE=mean/4 |
| Number of ANA                                        | 4.50 (1.125) | GAMMA | Assumption SE=mean/4 |
| Number of dsDNA tests                                | 0.00 (0.000) | GAMMA | Assumption SE=mean/4 |
| <i>Monitoring - Maintenance therapy</i>              |              |       |                      |
| Number of FBC                                        | 3.00 (0.750) | GAMMA | Assumption SE=mean/4 |
| Number of LFT                                        | 0.00 (0.000) | GAMMA | Assumption SE=mean/4 |
| Number of ESR                                        | 3.00 (0.750) | GAMMA | Assumption SE=mean/4 |
| Number of U&E                                        | 0.00 (0.000) | GAMMA | Assumption SE=mean/4 |
| Number of X-Ray                                      | 0.00 (0.000) | GAMMA | Assumption SE=mean/4 |
| Number of TB test                                    | 1.00 (0.250) | GAMMA | Assumption SE=mean/4 |
| Number of ANA                                        | 3.00 (0.750) | GAMMA | Assumption SE=mean/4 |
| Number of dsANA tests                                | 0.00 (0.000) | GAMMA | Assumption SE=mean/4 |
| <i>AEs</i>                                           |              |       |                      |
| Rate NMSC/patient year                               | 0.00 (0.000) | BETA  | Assumption SE=mean/4 |
| Rate of malignancies/patient year                    | 0.00 (0.000) | BETA  | Assumption SE=mean/4 |
| Rate of severe infections/patient year               | 0.02 (0.004) | BETA  | Assumption SE=mean/4 |
| <i>Treatment specific costs - Secukinumab 300 mg</i> |              |       |                      |
| PsARC                                                | 54.10%       | CODA  |                      |
| PsARC and PASI75                                     | 40.50%       | CODA  |                      |
| PsARC and PASI90                                     | 26.50%       | CODA  |                      |
| PsARC and PASI 100                                   | 15.82%       | CODA  |                      |
| HAQ reduction responders                             | 0.561        | CODA  |                      |
| HAQ reduction non-responders                         | 0.139        | CODA  |                      |
| PASI50 response                                      | 77.30%       | CODA  |                      |
| PASI75 response                                      | 56.60%       | CODA  |                      |
| PASI90 response                                      | 36.80%       | CODA  |                      |
| PASI100 response                                     | 22.40%       | CODA  |                      |
| <i>Physician Visits - Induction period</i>           |              |       |                      |
| Rheumatologist                                       | 4.50 (1.125) | GAMMA | Assumption SE=mean/4 |
| Dermatologist                                        | 6.00 (1.50)  | GAMMA | Assumption SE=mean/4 |
| GP                                                   | 10.80 (2.70) | GAMMA | Assumption SE=mean/4 |
| <i>Physician Visits - Maintenance therapy</i>        |              |       |                      |
| Rheumatologist                                       | 3.50 (0.875) | GAMMA | Assumption SE=mean/4 |
| Dermatologist (annually)                             | 6.50 (1.625) | GAMMA | Assumption SE=mean/4 |
| GP (annually)                                        | 10.80 (2.70) | GAMMA | Assumption SE=mean/4 |
| <i>Monitoring - Induction period</i>                 |              |       |                      |
| Number of FBC                                        | 4.50 (1.125) | GAMMA | Assumption SE=mean/4 |
| Number of LFT                                        | 0.00 (0.000) | GAMMA | Assumption SE=mean/4 |
| Number of ESR                                        | 4.50 (1.125) | GAMMA | Assumption SE=mean/4 |
| Number of U&E                                        | 0.00 (0.000) | GAMMA | Assumption SE=mean/4 |
| Number of X-Ray                                      | 1.00 (0.250) | GAMMA | Assumption SE=mean/4 |
| Number of TB test                                    | 1.00 (0.250) | GAMMA | Assumption SE=mean/4 |
| Number of ANA                                        | 4.50 (1.125) | GAMMA | Assumption SE=mean/4 |
| Number of dsANA tests                                | 0.00 (0.000) | GAMMA | Assumption SE=mean/4 |
| <i>Monitoring - Maintenance therapy</i>              |              |       |                      |
| Number of FBC                                        | 3.00 (0.750) | GAMMA | Assumption SE=mean/4 |
| Number of LFT                                        | 0.00 (0.000) | GAMMA | Assumption SE=mean/4 |

|                                        |              |       |                      |
|----------------------------------------|--------------|-------|----------------------|
| Number of ESR                          | 3.00 (0.750) | GAMMA | Assumption SE=mean/4 |
| Number of U&E                          | 0.00 (0.000) | GAMMA | Assumption SE=mean/4 |
| Number of X-Ray                        | 0.00 (0.000) | GAMMA | Assumption SE=mean/4 |
| Number of TB test                      | 1.00 (0.250) | GAMMA | Assumption SE=mean/4 |
| Number of ANA                          | 3.00 (0.750) | GAMMA | Assumption SE=mean/4 |
| Number of dsANA tests                  | 0.00 (0.000) | GAMMA | Assumption SE=mean/4 |
| <i>AEs</i>                             |              |       |                      |
| Rate NMSC/patient year                 | 0.00 (0.000) | BETA  | Assumption SE=mean/4 |
| Rate of malignancies/patient year      | 0.01 (0.001) | BETA  | Assumption SE=mean/4 |
| Rate of severe infections/patient year | 0.02 (0.005) | BETA  | Assumption SE=mean/4 |

AEs, adverse events; ANA, antinuclear antibody; BSC, best supportive care; CODA, convergence diagnostics and output analysis; dsDNA, double-stranded deoxyribonucleic acid; ESR, erythrocyte sedimentation rate; FBC, full blood count; HAQ, Health Assessment Questionnaire; LFT, liver function test; MD, medical doctor; NMSC, nonmelanoma skin cancers; PASI, Psoriasis Area and Severity Index; PASI50, 75, 90, 100,  $\geq 50\%$ ,  $\geq 75\%$ ,  $\geq 90\%$  or 100% reduction from baseline PASI; PsARC, Psoriatic Arthritis Response Criteria; Q4W, every 4 weeks; SE, standard error; TB, tuberculosis; U&E, urea and electrolyte.

# BMJ Open

## Cost-effectiveness analysis of ixekizumab versus secukinumab in patients with psoriatic arthritis and concomitant moderate-to-severe psoriasis in Spain

|                                 |                                                                                                                                                                                                                                                                                                                                                                                                                                                                                                                                            |
|---------------------------------|--------------------------------------------------------------------------------------------------------------------------------------------------------------------------------------------------------------------------------------------------------------------------------------------------------------------------------------------------------------------------------------------------------------------------------------------------------------------------------------------------------------------------------------------|
| Journal:                        | <i>BMJ Open</i>                                                                                                                                                                                                                                                                                                                                                                                                                                                                                                                            |
| Manuscript ID                   | bmjopen-2019-032552.R2                                                                                                                                                                                                                                                                                                                                                                                                                                                                                                                     |
| Article Type:                   | Original research                                                                                                                                                                                                                                                                                                                                                                                                                                                                                                                          |
| Date Submitted by the Author:   | 02-Jul-2020                                                                                                                                                                                                                                                                                                                                                                                                                                                                                                                                |
| Complete List of Authors:       | Schweikert, Bernd; ICON, Real World Evidence Strategy & Analytics, Commercialisation & Outcomes<br>Malmberg, Chiara; ICON, Access, Commercialisation & Communications<br>Núñez, Mercedes; Eli Lilly and Company, Spain, Health Outcomes & Real World Evidence<br>Dilla, Tatiana; Eli Lilly and Company, Global Patient Outcomes & Real World Evidence International<br>Sapin, Christophe; Eli Lilly and Company, European Statistics<br>Hartz, Susanne; Eli Lilly and Company, Global Patient Outcomes & Real World Evidence International |
| <b>Primary Subject Heading</b>: | Rheumatology                                                                                                                                                                                                                                                                                                                                                                                                                                                                                                                               |
| Secondary Subject Heading:      | Health economics, Dermatology                                                                                                                                                                                                                                                                                                                                                                                                                                                                                                              |
| Keywords:                       | Ixekizumab, Secukinumab, Cost-effectiveness analysis, Spanish population, Psoriatic arthritis, Biologics                                                                                                                                                                                                                                                                                                                                                                                                                                   |
|                                 |                                                                                                                                                                                                                                                                                                                                                                                                                                                                                                                                            |

SCHOLARONE™  
Manuscripts



I, the Submitting Author has the right to grant and does grant on behalf of all authors of the Work (as defined in the below author licence), an exclusive licence and/or a non-exclusive licence for contributions from authors who are: i) UK Crown employees; ii) where BMJ has agreed a CC-BY licence shall apply, and/or iii) in accordance with the terms applicable for US Federal Government officers or employees acting as part of their official duties; on a worldwide, perpetual, irrevocable, royalty-free basis to BMJ Publishing Group Ltd ("BMJ") its licensees and where the relevant Journal is co-owned by BMJ to the co-owners of the Journal, to publish the Work in this journal and any other BMJ products and to exploit all rights, as set out in our [licence](#).

The Submitting Author accepts and understands that any supply made under these terms is made by BMJ to the Submitting Author unless you are acting as an employee on behalf of your employer or a postgraduate student of an affiliated institution which is paying any applicable article publishing charge ("APC") for Open Access articles. Where the Submitting Author wishes to make the Work available on an Open Access basis (and intends to pay the relevant APC), the terms of reuse of such Open Access shall be governed by a Creative Commons licence – details of these licences and which [Creative Commons](#) licence will apply to this Work are set out in our licence referred to above.

Other than as permitted in any relevant BMJ Author's Self Archiving Policies, I confirm this Work has not been accepted for publication elsewhere, is not being considered for publication elsewhere and does not duplicate material already published. I confirm all authors consent to publication of this Work and authorise the granting of this licence.

1  
2  
3  
4 **Cost-effectiveness analysis of ixekizumab versus secukinumab in**  
5 **patients with psoriatic arthritis and concomitant moderate-to-**  
6 **severe psoriasis in Spain**  
7  
8  
9

10  
11  
12 **Bernd Schweikert<sup>1</sup>, Chiara Malmberg<sup>2</sup>, Mercedes Nuñez<sup>3</sup>, Tatiana Dilla<sup>4</sup>,**  
13 **Christophe Sapin<sup>5</sup>, Susanne Hartz<sup>6</sup>**  
14  
15

16  
17  
18 **<sup>1</sup>Real World Evidence Strategy & Analytics, Commercialisation & Outcomes,**  
19 **ICON, Munich, Germany; <sup>2</sup>Access, Commercialisation & Communications,**  
20 **ICON, Munich, Germany; <sup>3</sup>Health Outcomes & Real World Evidence, Eli Lilly**  
21 **and Company, Madrid, Spain; <sup>4</sup>Global Patient Outcomes & Real World**  
22 **Evidence International, Eli Lilly and Company, Madrid, Spain; <sup>5</sup>Eli Lilly and**  
23 **Company, European Statistics, Neuilly-sur-Seine, France; <sup>6</sup>Global Patient**  
24 **Outcomes & Real World Evidence International, Eli Lilly and Company,**  
25 **Windlesham, UK**  
26  
27  
28  
29  
30  
31  
32

33 Corresponding Author: Bernd Schweikert

34  
35  
36  
37 Address: ICON, Konrad-Zuse-Platz 11, 81829 Munich, Germany

38  
39  
40  
41 Phone: +49(0)89.66610.5105

42 Email: Bernd.Schweikert@iconplc.com

43  
44 ORCID number: 0000-0001-8253-509X  
45  
46  
47  
48  
49

50 Running header: Cost-effectiveness of ixekizumab in psoriatic arthritis

51  
52  
53 Key words: Ixekizumab, Secukinumab, Cost-effectiveness analysis,  
54 Spanish population, Psoriatic arthritis, Biologics  
55  
56  
57  
58  
59  
60

## ABSTRACT

**Objective:** To conduct a cost-effectiveness analyses (CEA) from the perspective of the Spanish National Health System comparing ixekizumab versus secukinumab.

**Design:** A Markov model with a lifetime horizon and monthly cycles was developed based on the York model. Four health states were included: a 12- or 16-week biologic disease-modifying antirheumatic drugs (bDMARD) induction period, maintenance therapy, best supportive care (BSC) and death. Treatment response was assessed based on both Psoriatic Arthritis Response Criteria (PsARC) and  $\geq 90\%$  improvement in the Psoriasis Area Severity Index (PASI90). At the end of the induction period, responders transitioned to maintenance therapy. Non-responders and patients who discontinued maintenance therapy transitioned to BSC. Clinical efficacy data were derived from a network meta-analysis. Health utilities were generated by applying a regression analysis to PASI and Health Assessment Questionnaire – Disability Index (HAQ-DI) scores collected in the ixekizumab SPIRIT studies. Results were subject to extensive sensitivity and scenario analysis.

**Setting:** Spanish National Health System.

**Participants:** A hypothetical cohort of bDMARD-naïve patients with PsA and concomitant moderate-to-severe psoriasis was modelled.

**Interventions:** Ixekizumab and secukinumab.

**Results:** Ixekizumab performed favourably over secukinumab in the base-case analysis, although cost savings and quality-adjusted life-years (QALY) gains were modest. Total costs were €153,901 compared with €156,559 for secukinumab (difference –€2,658). Total QALYs were 9.175 versus 9.082 (difference 0.093). Base-case results were most sensitive to the annual bDMARD discontinuation rate and the modification of PsARC and PASI90 response to ixekizumab or secukinumab.

1  
2  
3 **Conclusions:** Ixekizumab provided more QALYs at a lower cost than secukinumab, with  
4 differences being on a relatively small scale. Sensitivity analysis showed that base-case  
5 results were generally robust to changes in most input parameters.  
6  
7  
8  
9  
10  
11  
12  
13  
14  
15  
16  
17  
18  
19  
20  
21  
22  
23  
24  
25  
26  
27  
28  
29  
30  
31  
32  
33  
34  
35  
36  
37  
38  
39  
40  
41  
42  
43  
44  
45  
46  
47  
48  
49  
50  
51  
52  
53  
54  
55  
56  
57  
58  
59  
60

For peer review only



## ARTICLE SUMMARY

### Strengths and limitations of this study

- A CEA was performed from the perspective of the Spanish National Health System comparing two interleukin-17A antagonists, ixekizumab and secukinumab
- The framework of this model is aligned with the York model; the 'gold standard' model for the economic evaluation of biologic treatments in PsA
- The current model uses a combined response criterion of PsARC and PASI to capture both joint and skin manifestations of PsA
- This analysis was limited by a lack of data available for costs and efficacy of supportive care given to PsA patients in Spain
- Due to uncertainty regarding the annual all-cause discontinuation rate, this model used assumptions consistent with previous models

## INTRODUCTION

Psoriatic arthritis (PsA) is a chronic inflammatory rheumatic disease characterised by pain, swelling and erosion of the joints.[1] PsA affects approximately 0.25% of the population worldwide [1] and 0.6% of the adult population in Spain.[2] PsA commonly co-exists with psoriasis, developing in up to 30% of psoriatic patients, and over 90% of patients with PsA will have concomitant psoriasis.[3,4] As a lifelong condition, PsA has a detrimental impact on quality of life due to pain and/or physical functional limitations associated with the disease.[1,3] It is also associated with substantial use of healthcare resources and high socioeconomic costs.[5,6]

A number of biologic disease-modifying antirheumatic drugs (bDMARDs), which inhibit key inflammatory cytokines, are approved for treating patients with PsA. Interleukin (IL)-17 has been identified as an effective target for the treatment of inflammatory diseases including PsA.[1,3] Ixekizumab, a high-affinity monoclonal antibody, is the most recently approved bDMARD targeting IL-17A for PsA, joining secukinumab, which uses the same target and similar mode of action.[7,8]

bDMARDs are considered major drivers of healthcare costs,[5] and the cost-effectiveness of these therapies often comes under scrutiny. Cost-effectiveness analyses (CEAs) comparing bDMARDs have been conducted using the York model,[9] an established economic framework, which, together with its subsequent versions, is considered the 'gold standard' for conducting CEAs in PsA.[10,11]

As inhibition of IL-17A is a relatively new mechanism of action, drugs in this class have not been the focus of CEAs.[12] To date, there are no published CEAs comparing ixekizumab with secukinumab (another IL-17A inhibitor) in Spain.

We conducted a CEA assessing the cost effectiveness, in terms of the incremental cost per quality-adjusted life-year (QALY) gained, of ixekizumab versus secukinumab in bDMARD-naïve patients with active PsA and concomitant moderate-to-severe psoriasis from the

1  
2  
3 perspective of the Spanish National Health System (NHS). Secukinumab was selected as a  
4 comparator for this CEA as both drugs belong to the same class, and this may be of interest  
5 to decision makers assessing these IL-17A inhibitors. In addition, both drugs are approved for  
6 the treatment of PsA and plaque psoriasis, and have demonstrated high efficacy, particularly  
7 on skin symptoms.[7,8] This CEA focused on bDMARD-naïve patients, as this patient  
8 population may receive greater clinical benefit from earlier (i.e. first-line) treatment.[13]  
9  
10  
11  
12  
13  
14

## 15 16 **METHODS**

### 17 18 **Model overview**

19  
20  
21  
22 A Markov model was developed to assess the cost effectiveness of ixekizumab versus  
23 secukinumab in a hypothetical cohort of bDMARD-naïve patients with active PsA and  
24 concomitant moderate-to-severe psoriasis in Spain. The Markov model framework  
25 accommodates different health states and is based on the assumption that future events  
26 depend on the current health state of the patient. The model was programmed in Visual Basics  
27 for Applications with a user interface in Microsoft® Excel.  
28  
29  
30  
31  
32  
33  
34

35  
36 The model is based on the most recent version of the York model [11] with monthly cycles and  
37 a lifetime horizon, which was considered appropriate to reflect the chronic nature of PsA as  
38 well as the treatment aim of delaying disease progression.[14] The model incorporated age-  
39 and gender-dependent mortality data for the normal Spanish population. Mean age and  
40 gender distribution was taken from the patient population in the SPIRIT-P1 and -P2 trials of  
41 ixekizumab in PsA.[15,16] Increased PsA-specific mortality risks from two different sources  
42 [17,18] were implemented in scenario analyses.  
43  
44  
45  
46  
47  
48  
49  
50

51  
52 The model includes four health states: 1) a 12- or 16-week bDMARD induction period; 2)  
53 maintenance bDMARD therapy; 3) best supportive care (BSC); and 4) death (Figure 1). A  
54 combination of Psoriatic Arthritis Response Criteria (PsARC) and Psoriasis Area Severity  
55 Index (PASI) was used to measure joint and skin response at the end of the induction period  
56 and to determine treatment continuation of ixekizumab and secukinumab (Figure 2).[19,20]  
57  
58  
59  
60

1  
2  
3 The induction period was set to 12 weeks and 16 weeks for ixekizumab and secukinumab,  
4 respectively. The induction period was chosen to reflect the time at which treatment efficacy  
5 is usually followed-up in clinical practice (approximately 3 months in Spain).[21,22] The  
6 difference in the length of induction period between the two drugs also acknowledges a degree  
7 of difference in the availability of clinical trial data for ixekizumab and secukinumab (i.e., across  
8 the included studies, more week 16 than week 12 data is available for secukinumab). The  
9 PsARC response to treatment was defined as an improvement from baseline in two of four  
10 criteria without worsening in any measure: tender/swollen joints; and physician/patient global  
11 assessment of disease activity (one of which must be a joint count). In a consensus from the  
12 Spanish Psoriasis Group, a panel of dermatologists agreed that a complete or nearly complete  
13 PASI response is the most relevant measure of effectiveness in clinical practice.[23] With this  
14 in mind,  $\geq 90\%$  improvement in PASI (PASI90) was chosen in the base-case analysis as part  
15 of the response criteria and the treatment effect measures in this model.

### 31 **Treatment sequences**

32  
33  
34 At the end of the induction period, responders transitioned to maintenance therapy, while non-  
35 responders and discontinuers transitioned to BSC (Figure 1) in which patients were assumed  
36 to receive standard treatment depending on their Health Assessment Questionnaire –  
37 Disability Index (HAQ-DI) and PASI status.[24] Dosage regimens for ixekizumab and  
38 secukinumab were aligned with the European market authorisation.[7,8] During maintenance  
39 therapy, patients were assumed to face a constant risk of all-cause treatment discontinuation,  
40 which was reflected by an annual discontinuation rate of 16.5% in line with previously applied  
41 methods.[10,11]

42  
43  
44 In the base-case analysis, baseline cohort characteristics were reflective of the demographic  
45 data from the ixekizumab SPIRIT-P1 and -P2 clinical trials [15,16] (Table 1).

### 56 **Treatment effect**

1  
2  
3 While PsARC and PASI90 were used as the combined response criterion (i.e. treatment  
4 continuation rule), the treatment effect was modelled as a change in baseline of the HAQ-DI  
5 and PASI scores,[25] reflecting the joint and skin components of PsA, respectively. Baseline  
6 HAQ-DI and PASI scores were derived from the SPIRIT-P1 and -P2 trials [15,16] (Table 1).  
7  
8 Treatment effect, represented by improvement (i.e. reductions) in HAQ-DI and PASI scores,  
9  
10 was assumed to be instantaneous; as such, the response was also applied during the  
11 induction period. Absolute change in HAQ-DI and PASI scores is based on data from a  
12 network meta-analysis (NMA).[25, 26] Key efficacy input data, derived from the NMA [25, 26]  
13 are provided in Supplementary Table 1.  
14  
15

16  
17 For patients who met the combined response of PsARC and PASI90 at the end of the induction  
18 period, the initial improvements in HAQ-DI and PASI continued during maintenance therapy  
19 until they transitioned into BSC. For patients entering BSC following discontinuation, it was  
20 assumed that some benefit was maintained from the initial bDMARD treatment. In the base  
21 case, for patients progressing to BSC, the HAQ-DI score was assumed to revert to the  
22 baseline HAQ-DI level prior to discontinuation (“rebound equal to initial gain”). The rebound  
23 effect was assumed to be immediate and patients were modelled to progress at the same rate  
24 as natural history progression (an increase of 0.018 per 3-month period) (Figure 3). For PASI  
25 score, it was assumed that for non-responders not meeting PASI90, there would still be some  
26 gain in PASI – albeit lower – while they were treated with a bDMARD in the induction period.  
27 Once in the BSC state, due to the progressive nature of PsA, it was assumed that patients  
28 would deteriorate at a rate of natural progression.  
29  
30  
31  
32  
33  
34  
35  
36  
37  
38  
39  
40  
41  
42  
43  
44  
45  
46  
47  
48

### 49 **Health utilities**

50  
51 Health utilities were based on HAQ-DI and PASI scores from the SPIRIT-P1 and -P2 clinical  
52 trials [15,16] with Spanish tariffs applied. Calculation of utilities followed the established  
53 methodology of mapping three-level version of EuroQol-5 Dimensions (EQ-5D-3L) utilities on  
54 HAQ and PASI scores using a parsimonious linear regression model without further covariates  
55 or interaction terms. [9–11] Alternative coefficients based on a similar algorithm using different  
56  
57  
58  
59  
60

1  
2  
3 data were applied in a sensitivity analysis. Utilities were calculated in each model cycle by  
4 multiplying HAQ and PASI levels with the estimated regression coefficients.  
5  
6

### 7 8 **Resource use and costs** 9

10  
11 As the CEA was conducted from the perspective of the Spanish NHS, only direct medical  
12 costs were considered in the model, and included medication, injection training, physician  
13 visits and therapy monitoring. Drug acquisition costs were derived from the Botplus database  
14 in Spain,[27] and costs for the administration and monitoring of treatments were obtained from  
15 various sources in Spain [28] (Table 2). Drug costs were based on the list prices as of Q4  
16 2018. Monitoring costs were based on the costing schedule published in 2017, which was still  
17 valid in 2018. Due to a lack of healthcare resource utilisation data by drug or class, healthcare  
18 costs and resource utilisation related to the administration and monitoring of bDMARDs was  
19 determined by an expert panel of four Spanish physicians (two rheumatologists and two  
20 dermatologists).  
21  
22  
23  
24  
25  
26  
27  
28  
29  
30  
31

32  
33 The severity of arthritis and psoriasis also may have an impact on healthcare costs.[10,11] To  
34 reflect this, costs related to HAQ-DI and PASI were also included per cycle in the  
35 model.[10,24] These costs were derived by converting and inflating results of established  
36 algorithms, which relate cost to absolute HAQ-DI and PASI values.  
37  
38  
39  
40  
41

42  
43 Aside from costs related to HAQ-DI and PASI, no additional costs were applied for patients in  
44 BSC. The costs of serious adverse events (i.e. requiring hospitalisation) associated with  
45 bDMARD treatment were not included in the base-case analysis, but they were included in a  
46 sensitivity analysis. The rates of adverse events were derived from the summary of product  
47 characteristics of ixekizumab and secukinumab.[7,8] Both costs and health utilities were  
48 discounted by 3% in the base case.  
49  
50  
51  
52  
53  
54

### 55 **Sensitivity analyses** 56 57 58 59 60

1  
2  
3 To explore the uncertainty inherent in the model, one-way (deterministic) sensitivity analysis,  
4 probabilistic sensitivity analysis and scenario analyses were undertaken. In the one-way  
5 sensitivity analysis, one variable at a time was altered to examine the effect on the results.  
6  
7 Most input parameters varied by  $\pm 20\%$  of the mean value, as 95% confidence interval (CI)  
8 values were not available. Exceptions to this included ranges of values used for the annual  
9 discontinuation rate (95% CI); discount rates for costs and health utilities (0%; 5%); treatment  
10 efficacy ( $\pm 10\%$  of the mean value); HAQ-DI improvement conditional on response (NMA  
11 results); physician and monitoring costs ( $\pm 1$  visit); and utility equations for PASI and HAQ-DI  
12 coefficients.

13  
14 A probabilistic sensitivity analysis was conducted by assigning distributions to input  
15 parameters (Supplementary Table 2) and sampling from these distributions in 1000 iterations.  
16 For efficacy inputs, the convergence diagnostics and output analysis (CODA) of the Bayesian  
17 NMA was used instead of applying parametric distributions, in line with internationally  
18 recognised technical guidance.[29] The input parameters included PsARC and PASI response  
19 rates, changes in HAQ-DI based on response criterion, costs based on HAQ-DI and PASI,  
20 discontinuation rates, various healthcare-related costs and the use of resources.

21  
22 A scenario analysis was conducted using a 10-year time horizon and alternative inputs for  
23 discount rates, increased PsA mortality, the definition of responders, the HAQ-DI rebound  
24 method, the utility equation, health state costs and placebo efficacy in BSC.

### 25 26 **Patient and public involvement**

27  
28 Patients or the public were not involved in the design, planning or execution of this work.

### 29 30 **RESULTS**

31  
32 Results of the base-case analysis in bDMARD-naïve patients with PsA and concomitant  
33 moderate-to-severe psoriasis are summarised in Table 3. Ixekizumab was associated with  
34 total cost savings of €2,658 compared with secukinumab (total costs €153,901 vs €156,559).  
35  
36  
37  
38  
39  
40  
41  
42  
43  
44  
45  
46  
47  
48  
49  
50  
51  
52  
53  
54  
55  
56  
57  
58  
59  
60

1  
2  
3 Total QALYs were higher for ixekizumab (9.175 vs 9.082, difference 0.093). Although  
4  
5 ixekizumab performed favourably over secukinumab in the base-case analysis, cost savings  
6  
7 and QALY gains were modest.  
8  
9

10 The deterministic sensitivity analysis showed that base-case results were generally robust to  
11  
12 changes in most input parameters, but were most sensitive to the annual discontinuation rate  
13  
14 for bDMARD therapy and modifications in PsARC and PASI90 response to ixekizumab or  
15  
16 secukinumab (Figure 4).  
17  
18

19 The probabilistic sensitivity analysis showed that approximately 49.5% of observations were  
20  
21 in the south-east quadrant, indicating that ixekizumab was still less costly and provided more  
22  
23 QALYs than secukinumab (Figure 5). Across the cost-effectiveness plane, 99% of replications  
24  
25 were located south-east of the line defined by a willingness to pay threshold of €30,000 per  
26  
27 QALY gained.  
28  
29

30 Overall, the scenario analyses showed that most of the parameters tested had relatively little  
31  
32 impact on the base-case results (Figure 6). In most scenarios, ixekizumab provided more  
33  
34 QALYs at a lower cost than secukinumab. While there was some variability regarding  
35  
36 incremental cost and QALYs between ixekizumab versus secukinumab, in all scenarios the  
37  
38 mean results still indicated the dominance of ixekizumab over secukinumab.  
39  
40

## 41 42 **DISCUSSION**

43  
44 In this CEA, the cost effectiveness of ixekizumab compared to secukinumab was evaluated in  
45  
46 bDMARD-naïve patients with active PsA and concomitant moderate-to-severe psoriasis from  
47  
48 the perspective of the Spanish NHS. In general, ixekizumab performed favourably compared  
49  
50 to secukinumab in the base-case analysis, with differences in cost savings and QALY gains  
51  
52 being modest. The total difference in cost between ixekizumab and secukinumab was  
53  
54 –€2,658, with a small total difference in QALYs of 0.093. In the deterministic sensitivity  
55  
56 analysis, the most influential variables were the annual discontinuation rate and the PsARC  
57  
58 and PASI90 response for ixekizumab and secukinumab.  
59  
60



1  
2  
3 The framework of this model is closely aligned with the most recently revised version of the  
4 York model,[11] which is considered a 'benchmark' model for the economic evaluation of  
5 biologic treatments in PsA. The original York model has subsequently been revised to  
6 accommodate the analysis of patient subgroups. The model used in this analysis includes this  
7 amendment as a key feature. The current model also allows for combining PsARC and PASI  
8 as a response criterion, therefore capturing both joint and skin response. A combined  
9 response criterion presents a more realistic representation of this multifaceted disease and  
10 may be especially useful when evaluating clinical benefits of bDMARDs, such as IL-17A  
11 antagonists, which are known for their proven efficacy on skin response.[30,31]  
12  
13  
14  
15  
16  
17  
18  
19  
20  
21  
22

23 A limitation of this analysis was a lack of current data for health state cost estimates and the  
24 efficacy of BSC. There is also uncertainty regarding the annual all-cause discontinuation rate;  
25 therefore, our model used input data consistent with previously applied methods.[10,11] Given  
26 the sensitivity of the results to this parameter, correction or confirmation of the current  
27 assumptions based on mature real-world drug survival data is a clear research need for the  
28 future.  
29  
30  
31  
32  
33  
34  
35

36 In addition, the actual acquisition costs of bDMARDs in clinical practice tend to differ from list  
37 prices because any confidential discounts are unknown and therefore cannot be reflected in  
38 the analyses. Therefore, the respective differences in drug prices in clinical practice would  
39 also affect the true cost differences between treatment arms in the analysis.  
40  
41  
42  
43  
44

45 It should also be noted that the NMA [25, 26], which provided key efficacy data for this analysis,  
46 may not include some very recently published studies. However, at the time the NMA was  
47 performed all relevant evidence available for approved drugs was included and any studies  
48 published after are unlikely to have a substantial impact on the NMA findings, and by extension  
49 the results of this analysis.  
50  
51  
52  
53  
54  
55  
56  
57  
58  
59  
60

## CONCLUSION

In this CEA of ixekizumab versus secukinumab in bDMARD-naïve patients with PsA and concomitant moderate-to-severe psoriasis in Spain, ixekizumab provided more QALYs at a lower cost, with differences being on a relatively small scale. As differences in total costs and QALYs were modest, other factors, such as patient preferences, may also be considered during clinical decision making. Base-case results were generally robust to modifications in most input parameters, but were most sensitive to the annual bDMARD discontinuation rate and variations in PsARC and PASI90 response to ixekizumab or secukinumab.

## ACKNOWLEDGMENTS

The authors would like to acknowledge Elinor Wylde and Greg Plosker (Rx Communications, Mold, UK) for medical writing assistance with the preparation of this manuscript, funded by Eli Lilly.

## FUNDING

This study was funded by Eli Lilly and Company.

## CONFLICTS OF INTEREST

**BS** and **CM** are full-time employees of ICON who were commissioned by Eli Lilly and Company to conduct the analysis for this work. **MN**, **TD**, **CS** and **SH** are full-time employees of Eli Lilly and Company; they receive a salary and own company stock.

## AUTHOR CONTRIBUTIONS

**BS** and **CM** were involved with the conception and design of the work, and the interpretation of the data. **MN** and **CS** were involved with the acquisition and interpretation of the data. **TD** was involved with the conception of the work and interpretation of the data. **SH** was involved with the interpretation of the data. All named have provided critical revision of the manuscript for important intellectual content and have given their approval for this version to be published. All authors had full access to all of the data in this study and take complete responsibility for the integrity of the data and accuracy of the data analysis.

## DATA SHARING STATEMENT

All data relevant to the study are included in the article or uploaded as supplementary information.

## REFERENCES

1. McArdle A, Pennington S, FitzGerald O. Clinical features of psoriatic arthritis: a comprehensive review of unmet clinical needs. *Clin Rev Allergy Immunol* 2018;55:271–94.
2. Seoane-Mato D, Sánchez-Piedra C, Díaz-González F, et al. THU0684 Prevalence of rheumatic diseases in adult population in Spain. Episer 2016 study. *Ann Rheum Dis* 2018;77:535–36.
3. Ritchlin CT, Colbert RA, Gladman DD. Psoriatic arthritis. *N Engl J Med* 2017;376:957–70.
4. Ciocon DH, Kimball AB. Psoriasis and psoriatic arthritis: separate or one and the same? *Br J Dermatol* 2007;157(5):850–60.
5. D'Angiolella LS, Cortesi PA, Lafranconi A, et al. Cost and cost effectiveness of treatments for psoriatic arthritis: a systematic literature review. *Pharmacoeconomics* 2018;36:567–89.
6. Kawalec P, Malinowski KP. The indirect costs of psoriatic arthritis: systematic review and meta-analysis. *Expert Rev Pharmacoecon Outcomes Res* 2015;15:125–32.
7. European Medicines Agency. Ixekizumab (Taltz): Summary of product characteristics 2016. [www.ema.europa.eu/documents/product-information/taltz-epar-product-information\\_en.pdf](http://www.ema.europa.eu/documents/product-information/taltz-epar-product-information_en.pdf) (accessed 22 Mar 2019).
8. European Medicines Agency. Secukinumab (Cosentyx): Summary of product characteristics 2015. [www.ema.europa.eu/documents/product-information/cosentyx-epar-product-information\\_en.pdf](http://www.ema.europa.eu/documents/product-information/cosentyx-epar-product-information_en.pdf) (accessed 22 Mar 2019).
9. Woolacott N, Bravo Vergel Y, Hawkins N, et al. Etanercept and infliximab for the treatment of psoriatic arthritis: a systematic review and economic evaluation. *Health Technol Assess* 2006;10:iii–iv, xiii–xvi, 1–239.

- 1  
2  
3 10. Rodgers M, Epstein D, Bojke L, et al. Etanercept, infliximab and adalimumab for the  
4 treatment of psoriatic arthritis: a systematic review and economic evaluation. *Health*  
5 *Technol Assess* 2011;15:i–xxi, 1–329.  
6  
7  
8  
9  
10 11. Corbett M, Chehadah F, Biswas M, et al. Certolizumab pegol and secukinumab for  
11 treating active psoriatic arthritis following inadequate response to disease-modifying  
12 antirheumatic drugs: a systematic review and economic evaluation. *Health Technol*  
13 *Assess* 2017;21:1–326.  
14  
15  
16  
17 12. Wasilewska A, Winiarska M, Olszewska M, et al. Interleukin-17 inhibitors. A new era  
18 in treatment of psoriasis and other skin diseases. *Postepy Dermatol Alergol*  
19 2016;33:247–52.  
20  
21  
22  
23 13. Raychaudhuri SP, Wilken R, Sukhov AC, et al. Management of psoriatic arthritis: Early  
24 diagnosis, monitoring of disease severity and cutting edge therapies. *J Autoimmun*  
25 2017;76:21–37.  
26  
27  
28  
29  
30 14. Mease PJ, Armstrong AW. Managing patients with psoriatic disease: the diagnosis and  
31 pharmacologic treatment of psoriatic arthritis in patients with psoriasis. *Drugs*  
32 2014;74:423–41.  
33  
34  
35  
36 15. Mease PJ, van der Heijde D, Ritchlin CT, et al. Ixekizumab, an interleukin-17A specific  
37 monoclonal antibody, for the treatment of biologic-naïve patients with active psoriatic  
38 arthritis: results from the 24-week randomised, double-blind, placebo-controlled and  
39 active (adalimumab)-controlled period of the phase III trial SPIRIT-P1. *Ann Rheum Dis*  
40 2017;76:79–87.  
41  
42  
43  
44  
45  
46  
47 16. Nash P, Kirkham B, Okada M, et al. Ixekizumab for the treatment of patients with active  
48 psoriatic arthritis and an inadequate response to tumour necrosis factor inhibitors:  
49 results from the 24-week randomised, double-blind, placebo-controlled period of the  
50 SPIRIT-P2 phase 3 trial. *Lancet* 2017;389:2317–27.  
51  
52  
53  
54  
55  
56 17. Ali Y, Tom BD, Schentag CT, et al. Improved survival in psoriatic arthritis with calendar  
57 time. *Arthritis Rheum* 2007;56:2708–14.  
58  
59  
60

- 1  
2  
3 18. Wong K, Gladman DD, Husted J, et al. Mortality studies in psoriatic arthritis: results  
4 from a single outpatient clinic. I. Causes and risk of death. *Arthritis Rheum*  
5 1997;40:1868–72.  
6  
7  
8  
9 19. Mease PJ, Antoni CE, Gladman DD, et al. Psoriatic arthritis assessment tools in clinical  
10 trials. *Ann Rheum Dis* 2005;64:ii49–54.  
11  
12  
13 20. Fransen J, Antoni C, Mease PJ, et al. Performance of response criteria for assessing  
14 peripheral arthritis in patients with psoriatic arthritis: analysis of data from randomised  
15 controlled trials of two tumour necrosis factor inhibitors. *Ann Rheum Dis*  
16 2006;65:1373–8.  
17  
18  
19 21. Torre Alonso JC, Díaz Del Campo Fontecha P, Almodóvar R, et al. Recommendations  
20 of the Spanish Society of Rheumatology on treatment and use of systemic biological  
21 and non-biological therapies in psoriatic arthritis. *Reumatol Clin* 2018;14:254–68.  
22  
23  
24 22. Ruiz-Villaverde R, Rodriguez-Fernandez-Freire L, Galán-Gutierrez M, et al. Eficacia  
25 del secukinumab en psoriasis y artritis psoriásica: estudio multicéntrico retrospectivo.  
26 *Med Clin (Barc)* 2019; pii:S0025-7753(19)30006-5  
27 doi.org/10.1016/j.medcli.2018.12.009  
28  
29  
30 23. Carretero G, Puig L, Carrascosa JM, et al. Redefining the therapeutic objective in  
31 psoriatic patient candidates for biological therapy. *J Dermatolog Treat* 2018;29:334–  
32 46.  
33  
34  
35 24. Kobelt G, Jönsson L, Lindgren P, et al. Modeling the progression of rheumatoid  
36 arthritis: a two-country model to estimate costs and consequences of rheumatoid  
37 arthritis. *Arthritis Rheum* 2002;46:2310–19.  
38  
39  
40 25. Ruysen-Witrand A, Perry R, Watkins C, et al. Efficacy and safety of biologics in  
41 psoriatic arthritis: a systematic literature review and network meta-analysis. *RMD*  
42 *Open* 2020;6:e001117.  
43  
44  
45 26. Ruysen-Witrand A, Sapin C, Hartz S, et al. THU0290 Effects of biologic dmards on  
46 physical function in patients with active psoriatic arthritis: results of network meta-  
47 analyses. *Ann Rheum Dis* 2018;77:363–4.  
48  
49  
50  
51  
52  
53  
54  
55  
56  
57  
58  
59  
60

- 1  
2  
3 27. Consejo General de Colegios Oficiales de Farmacéuticos. Botplus database 2018.  
4  
5 <https://botplusweb.portalfarma.com/botplus.aspx> (accessed 22 Mar 2019).  
6  
7 28. Oblikue Consulting. Base de datos de costes sanitarios españoles: eSalud 2007.  
8  
9 <http://www.oblikue.com/bddcostes/> (accessed 22 Mar 2019).  
10  
11 29. Dias S, Sutton AJ, Welton NJ, et al. Evidence synthesis for decision making 6:  
12 embedding evidence synthesis in probabilistic cost-effectiveness analysis. *Med Decis*  
13 *Making* 2013;33:671–8.  
14  
15 30. Betteridge N, Boehncke WH, Bundy C, et al. Promoting patient-centred care in  
16 psoriatic arthritis: a multidisciplinary European perspective on improving the patient  
17 experience. *J Eur Acad Dermatol Venereol* 2016;30:576–85.  
18  
19 31. Gottlieb AB, Strand V, Kishimoto M, et al. Ixekizumab improves patient-reported  
20 outcomes up to 52 weeks in bDMARD-naïve patients with active psoriatic arthritis  
21 (SPIRIT-P1). *Rheumatology (Oxford)* 2018;57:1777–88.  
22  
23  
24  
25  
26  
27  
28  
29  
30  
31  
32  
33  
34  
35  
36  
37  
38  
39  
40  
41  
42  
43  
44  
45  
46  
47  
48  
49  
50  
51  
52  
53  
54  
55  
56  
57  
58  
59  
60

**Table 1.** Characteristics of the target population of bDMARD-naïve patients with PsA and concomitant moderate-to-severe psoriasis based on the ixekizumab SPIRIT-P1 and -P2 clinical trials.

| Parameter             | Mean value |
|-----------------------|------------|
| Age                   | 51.0 years |
| Proportion male       | 51.8%      |
| Proportion female     | 48.2%      |
| Body weight           | 87.0 kg    |
| Baseline HAQ-DI score | 1.19       |
| Baseline PASI score   | 20.4       |

Patient characteristics based on pooled data from the intent-to-treat trial populations of SPIRIT-P1 and -P2 with ixekizumab. [15,16]

bDMARD, biologic disease-modifying anti-rheumatic drug; HAQ-DI, Health Assessment Questionnaire – Disability Index; PASI, Psoriasis Area Severity Index; PsA, psoriatic arthritis.



**Table 2.** Costs for administration and monitoring of treatment in Spain.

| Resource                                    | Cost               | Source                                                                                |
|---------------------------------------------|--------------------|---------------------------------------------------------------------------------------|
| <i>Drug acquisition costs (list prices)</i> |                    |                                                                                       |
| Ixekizumab 80 mg Q4W pre-filled pen         | €934.25 per dose   | Botplus database [27] minus rebate of 7.5% according to Spanish regulation RDL 8/2010 |
| Secukinumab 300 mg pre-filled pen           | €1,057.38 per dose | Botplus database [27] minus rebate of 7.5% according to Spanish regulation RDL 8/2010 |
| <i>Visits</i>                               |                    |                                                                                       |
| Rheumatologist                              | €220.62            | Base de datos de costes sanitarios españoles [28]                                     |
| Dermatologist                               | €100.58            | Base de datos de costes sanitarios españoles [28]                                     |
| GP                                          | €33.86             | Base de datos de costes sanitarios españoles [28]                                     |
| <i>Monitoring</i>                           |                    |                                                                                       |
| Full blood count                            | €67.98             | Base de datos de costes sanitarios españoles [28]                                     |
| Erythrocyte sedimentation rate              | €1.03              | Base de datos de costes sanitarios españoles [28]                                     |
| Chest X-ray                                 | €42.23             | Base de datos de costes sanitarios españoles [28]                                     |
| Tuberculosis test                           | €8.95              | Base de datos de costes sanitarios españoles [28]                                     |
| C-reactive protein test                     | €8.95              | Base de datos de costes sanitarios españoles [28]                                     |

GP, general practitioner; Q4W, every four weeks.

**Table 3.** Results of the base-case analysis comparing ixekizumab and secukinumab in bDMARD-naïve patients with active PsA and concomitant moderate-to-severe psoriasis.

| Parameter                              | Ixekizumab | Secukinumab | Difference |
|----------------------------------------|------------|-------------|------------|
| <i>Costs (year 2018 values)</i>        |            |             |            |
| Total costs                            | €153,901   | €156,559    | -€2,658    |
| Treatment costs                        | €26,424    | €27,729     | -€1,305    |
| Administration costs                   | €26        | €24         | €2         |
| Physician visit costs                  | €4,141     | €4,202      | -€61       |
| Monitoring costs                       | €797       | €706        | €92        |
| On treatment HAQ-DI/PASI-related costs | €4,608     | €4,115      | €494       |
| BSC costs                              | €117,904   | €119,784    | -€1,880    |
| <i>QALYs</i>                           |            |             |            |
| Total QALYs                            | 9.175      | 9.082       | 0.093      |

BSC, best supportive care; HAQ-DI, Health Assessment Questionnaire – Disability Index; PASI, Psoriasis Area Severity Index; PsA, psoriatic arthritis; QALYs, quality-adjusted life-years.

## Figure Legends and abbreviations

**Figure 1.** Schematic representation of the model structure in bDMARD-naïve patients with active PsA and concomitant moderate-to-severe psoriasis. Dosage regimens were aligned with the European market authorisation. Although not shown in the figure, patients could transition to death from any state.

BSC, best supportive care; bDMARD, biologic disease-modifying anti-rheumatic drug; PsA, psoriatic arthritis; Q4W, every 4 weeks.

**Figure 2.** A combination of PsARC response and  $\geq 90\%$  improvement in PASI (PASI90) was used to capture both joint and skin response at the end of the induction period.

**Figure 3.** Scenarios for HAQ-DI rebound after the discontinuation of treatment.

HAQ-DI, Health Assessment Questionnaire – Disability Index.

**Figure 4.** Results of the one-way sensitivity analysis in bDMARD-naïve patients with PsA and concomitant moderate-to-severe psoriasis.

bDMARD, biologic disease-modifying anti-rheumatic drug; CI, confidence interval; FBC, full blood count; HAQ-DI, Health Assessment Questionnaire-Disability Index; ICER, incremental cost-effectiveness ratio; Ixe, ixekizumab; p.a., per annum; PASI90,  $\geq 90\%$  reduction from baseline Psoriasis Area Severity Index score; PsA, psoriatic arthritis; PsARC, Psoriatic Arthritis Response Criteria; QALY, quality-adjusted life-year; Q4W, every 4 weeks; SE, standard error; Sec, secukinumab; Trt, treatment.

1  
2  
3 **Figure 5.** Results of the probabilistic sensitivity analysis in bDMARD-naïve patients with PsA  
4 and concomitant moderate-to-severe psoriasis. Approximately 49.5% of observations were in  
5 the south-east quadrant, 28.6% were in the south-west quadrant and 21.9% were in the north-  
6 east quadrant of the cost-effectiveness plane.  
7  
8  
9

10  
11 bDMARD, biologic disease-modifying anti-rheumatic drug; Ixe, ixekizumab; PsA, psoriatic  
12 arthritis; QALY, quality-adjusted life-year; Q4W, every 4 weeks; Sec, secukinumab; WTP,  
13 willingness to pay.  
14  
15  
16  
17

18  
19  
20 **Figure 6.** Results of scenario analyses in bDMARD-naïve patients with PsA and concomitant  
21 moderate-to-severe psoriasis.  
22

23  
24 bDMARD, biologic disease-modifying anti-rheumatic drug; PASI75,  $\geq 75\%$  reduction in  
25 Psoriasis Area Severity Index score; PASI100, 100% reduction in PASI score; PsA, psoriatic  
26 arthritis; PsARC, Psoriatic Arthritis Response Criteria; QALY, quality-adjusted life-year; Resp,  
27 response; yrs, years.  
28  
29  
30  
31  
32  
33  
34  
35  
36  
37  
38  
39  
40  
41  
42  
43  
44  
45  
46  
47  
48  
49  
50  
51  
52  
53  
54  
55  
56  
57  
58  
59  
60

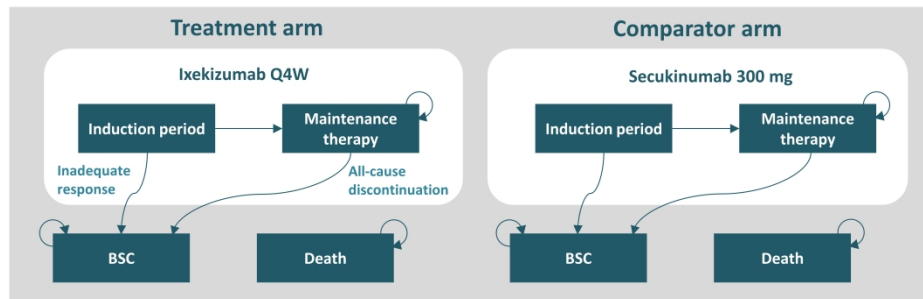

Figure 1. Schematic representation of the model structure in bDMARD-naïve patients with active PsA and concomitant moderate-to-severe psoriasis. Dosage regimens were aligned with the European market authorisation. Although not shown in the figure, patients could transition to death from any state.

228x75mm (600 x 600 DPI)

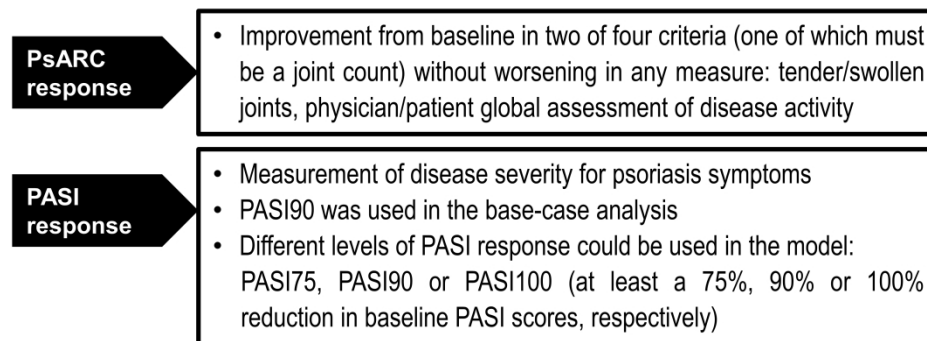

Figure 2. A combination of PsARC response and  $\geq 90\%$  improvement in PASI (PASI90) was used to capture both joint and skin response at the end of the induction period.

178x70mm (600 x 600 DPI)

1  
2  
3  
4  
5  
6  
7  
8  
9  
10  
11  
12  
13  
14  
15  
16  
17  
18  
19  
20  
21  
22  
23  
24  
25  
26  
27  
28  
29  
30  
31  
32  
33  
34  
35  
36  
37  
38  
39  
40  
41  
42  
43  
44  
45  
46  
47  
48  
49  
50  
51  
52  
53  
54  
55  
56  
57  
58  
59  
60

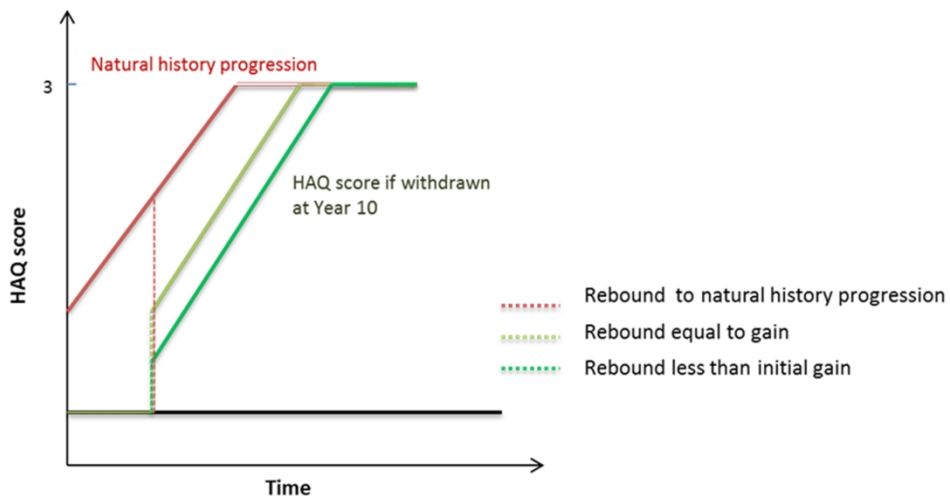

Figure 3. Scenarios for HAQ-DI rebound after the discontinuation of treatment.

228x120mm (600 x 600 DPI)

1  
2  
3  
4  
5  
6  
7  
8  
9  
10  
11  
12  
13  
14  
15  
16  
17  
18  
19  
20  
21  
22  
23  
24  
25  
26  
27  
28  
29  
30  
31  
32  
33  
34  
35  
36  
37  
38  
39  
40  
41  
42  
43  
44  
45  
46  
47  
48  
49  
50  
51  
52  
53  
54  
55  
56  
57  
58  
59  
60

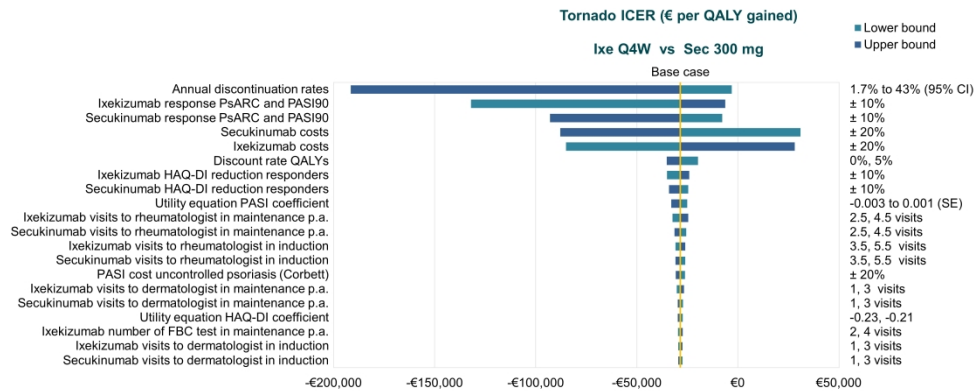

Figure 4. Results of the one-way sensitivity analysis in bDMARD-naïve patients with PsA and concomitant moderate-to-severe psoriasis.

338x140mm (300 x 300 DPI)



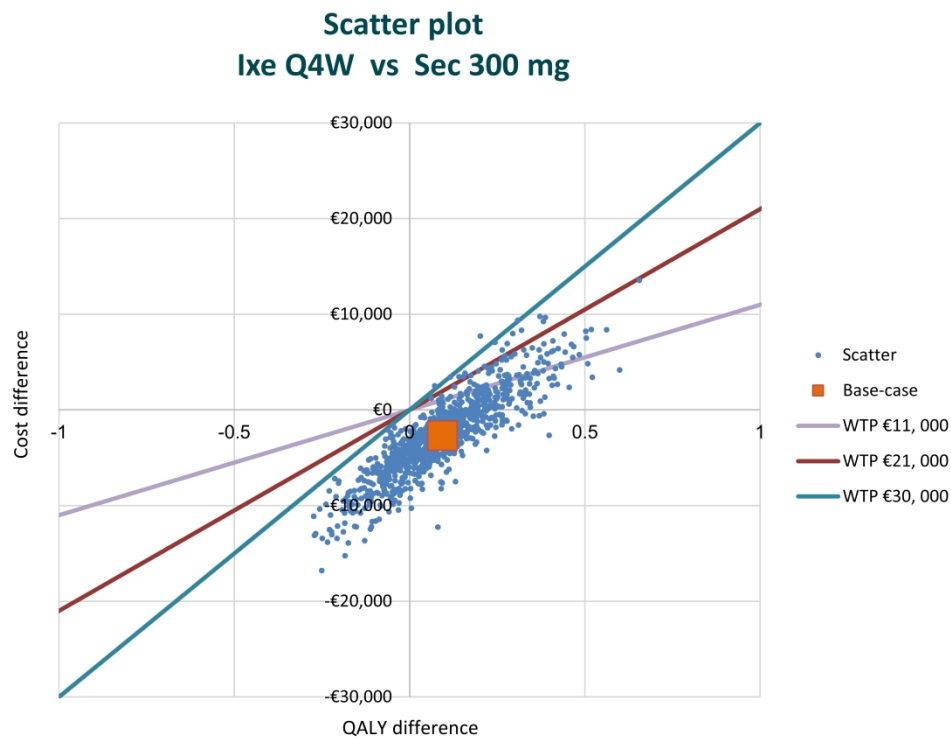

Figure 5. Results of the probabilistic sensitivity analysis in bDMARD-naïve patients with PsA and concomitant moderate-to-severe psoriasis. Approximately 49.5% of observations were in the south-east quadrant, 28.6% were in the south-west quadrant and 21.9% were in the north-east quadrant of the cost-effectiveness plane.

168x130mm (600 x 600 DPI)

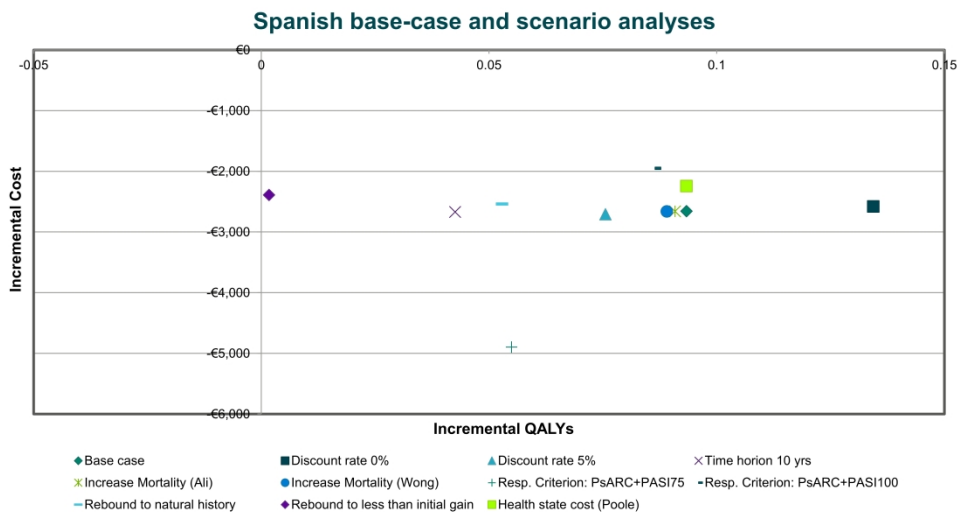

Figure 6. Results of scenario analyses in bDMARD-naïve patients with PsA and concomitant moderate-to-severe psoriasis.

273x145mm (600 x 600 DPI)

BMJ Open

Cost-effectiveness analysis of ixekizumab versus secukinumab in patients with psoriatic arthritis and concomitant moderate-to-severe psoriasis in Spain

Bernd Schweikert, Chiara Malmberg, Mercedes Nuñez, Tatiana Dilla, Christophe Sapin, Susanne Hartz

Corresponding Author: Dr. Bernd Schweikert

ICON plc, Konrad-Zuse-Platz 11, 81829 Munich, Germany

bernd.schweikert@iconplc.com

Supplementary Table 1. Efficacy input data used in the base-case analysis based on data from a related network meta-analysis. [23, 24]

| Treatment     | Probability of response for chosen criterion |                    | HAQ reduction |                | PASI response      |                    |                    | PASI reduction |                |
|---------------|----------------------------------------------|--------------------|---------------|----------------|--------------------|--------------------|--------------------|----------------|----------------|
|               | PsARC                                        | PsARC and PASI90   | Responders    | Non-responders | PASI75             | PASI90             | PASI100            | Responders     | Non-responders |
| Ixe 80 mg Q4W | 53.0%                                        | 34.4%              | 0.51          | 0.05           | 70.9%              | 52.0%              | 35.4%              | 18.36          | 9.49           |
| Sec 300 mg    | 54.1% <sup>a</sup>                           | 26.5% <sup>a</sup> | 0.56          | 0.14           | 56.6% <sup>a</sup> | 36.8% <sup>a</sup> | 22.4% <sup>a</sup> | 18.36          | 8.13           |

<sup>a</sup>Data derived from a mixed population of bDMARD-naïve and -experienced patients (due to lack of data reported specifically for bDMARD-naïve patients). DMARD, biologic disease-modifying anti-rheumatic drug; HAQ, Health Assessment Questionnaire; Ixe, ixekizumab, PASI, Psoriasis Area and Severity Index; PASI75, 90, 100, ≥75%, ≥90% or 100% reduction from baseline PASI; PsARC, Psoriatic Arthritis Response Criteria; Q4W, every 4 weeks; Sec, secukinumab.

## BMJ Open

**Cost-effectiveness analysis of ixekizumab versus secukinumab in patients with psoriatic arthritis and concomitant moderate-to-severe psoriasis in Spain**

Bernd Schweikert, Chiara Malmberg, Mercedes Nuñez, Tatiana Dilla, Christophe Sapin, Susanne Hartz

**Corresponding Author:** Dr. Bernd Schweikert

ICON plc, Konrad-Zuse-Platz 11, 81829 Munich, Germany

bernd.schweikert@iconplc.com

**Supplementary Table 2.** Parameters used in the probabilistic sensitivity analysis

| Parameter                             | Mean (SE)         | Distribution type | CI/assumptions         |
|---------------------------------------|-------------------|-------------------|------------------------|
| <i>Utility regression calculation</i> |                   |                   |                        |
| Intercept                             | 0.903 (0.009)     | BETA              |                        |
| HAQ                                   | -0.219 (0.010)    | NORMAL            |                        |
| PASI                                  | -0.001 (0.002)    | NORMAL            |                        |
| Annual HAQ progression                | 0.072 (0.018)     | GAMMA             | Assumption SE=mean/4   |
| Annual discontinuation rate           | 0.165 (0.041)     | BETA              | Assumption SE=mean/4   |
| Mean weight                           | 87.02 (0.454)     | NORMAL            | Based on SPIRIT trials |
| Additional annual cost of BSC         | 0.00 (0.000)      | GAMMA             | Assumption SE=mean/4   |
| <i>Monitoring Costs</i>               |                   |                   |                        |
| Cost of full blood count              | 67.98 (17.0)      | GAMMA             | Assumption SE=mean/4   |
| Cost of liver function test           | 5.9566 (1.5)      | GAMMA             | Assumption SE=mean/4   |
| Cost of ESR                           | 1.03 (0.3)        | GAMMA             | Assumption SE=mean/4   |
| Cost of urea and electrolytes test    | 75.8183 (19.0)    | GAMMA             | Assumption SE=mean/4   |
| Cost of X-Ray                         | 42.23 (10.6)      | GAMMA             | Assumption SE=mean/4   |
| Cost of TB test                       | 8.95 (2.2)        | GAMMA             | Assumption SE=mean/4   |
| Cost of ANA test                      | 8.9507 (2.2)      | GAMMA             | Assumption SE=mean/4   |
| Cost of dsDNA test                    | 0 (0.0)           | GAMMA             | Assumption SE=mean/4   |
| <i>Admin costs</i>                    |                   |                   |                        |
| Cost of subcutaneous injection        | 1.11 (0.3)        | GAMMA             | Assumption SE=mean/4   |
| Cost of intravenous infusion          | 81.82 (20.5)      | GAMMA             | Assumption SE=mean/4   |
| <i>Physician costs</i>                |                   |                   |                        |
| Cost of rheumatologist visit          | 220.62 (55.2)     | GAMMA             | Assumption SE=mean/4   |
| Cost of dermatologist visit           | 100.58 (25.1)     | GAMMA             | Assumption SE=mean/4   |
| Cost of GP visit                      | 33.86 (8.5)       | GAMMA             | Assumption SE=mean/4   |
| <i>AEs hospital costs</i>             |                   |                   |                        |
| NMSC                                  | 3858.07 (964.5)   | GAMMA             | Assumption SE=mean/4   |
| Lymphoma                              | 10345.71 (2586.4) | GAMMA             | Assumption SE=mean/4   |
| Melanoma                              | 3966.44 (991.6)   | GAMMA             | Assumption SE=mean/4   |
| Sepsis                                | 7769.76 (1942.4)  | GAMMA             | Assumption SE=mean/4   |

|                                                  |                  |        |                      |
|--------------------------------------------------|------------------|--------|----------------------|
| TB                                               | 7110.13 (1777.5) | GAMMA  | Assumption SE=mean/4 |
| Pneumonia                                        | 4558.02 (1139.5) | GAMMA  | Assumption SE=mean/4 |
| Skin and soft tissue infection                   | 4171.03 (1042.8) | GAMMA  | Assumption SE=mean/4 |
| one and joint infection                          | 7245.83 (1811.5) | GAMMA  | Assumption SE=mean/4 |
| Urinary tract infection                          | 3347.43 (836.9)  | GAMMA  | Assumption SE=mean/4 |
| <i>Health state costs</i>                        |                  |        |                      |
| Kobelt HAQ regression constant                   | 636.56 (410.7)   | NORMAL | Kobelt               |
| Kobelt HAQ regression intercept                  | 2101.70 (739.7)  | NORMAL | Kobelt               |
| Corbett PASI cost uncontrolled psoriasis         | 2871.95 (718.0)  | GAMMA  | Assumption SE=mean/4 |
| Corbett PASI cost controlled psoriasis           | 81.03 (2.03)     | GAMMA  | Assumption SE=mean/4 |
| Kobelt cost adjustment factor                    | 0.85 (0.2)       | BETA   | Assumption SE=mean/4 |
| <i>Efficacy of BSC</i>                           |                  |        |                      |
| PsARC                                            | 30.60%           | CODA   |                      |
| PsARC and PASI75                                 | 5.04%            | CODA   |                      |
| PsARC and PASI90                                 | 1.77%            | CODA   |                      |
| PsARC and PASI100                                | 0.61%            | CODA   |                      |
| HAQ reduction responders                         | 0.257            | CODA   |                      |
| HAQ reduction non-responders                     | -0.009           | CODA   |                      |
| PASI50 response                                  | 17.40%           | CODA   |                      |
| PASI75 response                                  | 6.40%            | CODA   |                      |
| PASI90 response                                  | 2.20%            | CODA   |                      |
| PASI100 response                                 | 0.70%            | CODA   |                      |
| <i>Treatment specific costs - Ixekizumab Q4W</i> |                  |        |                      |
| PsARC                                            | 53.00%           | CODA   |                      |
| PsARC and PASI75                                 | 46.65%           | CODA   |                      |
| PsARC and PASI90                                 | 34.40%           | CODA   |                      |
| PsARC and PASI 100                               | 23.01%           | CODA   |                      |
| HAQ reduction responders                         | 0.506            | CODA   |                      |
| HAQ reduction non-responders                     | 0.052            | CODA   |                      |
| PASI50 response                                  | 87.20%           | CODA   |                      |
| PASI75 response                                  | 70.90%           | CODA   |                      |
| PASI90 response                                  | 52.00%           | CODA   |                      |
| PASI100 response                                 | 35.40%           | CODA   |                      |
| <i>Physician Visits - Induction period</i>       |                  |        |                      |
| Rheumatologist                                   | 4.50 (1.125)     | GAMMA  | Assumption SE=mean/4 |
| Dermatologist                                    | 6.00 (1.50)      | GAMMA  | Assumption SE=mean/4 |
| GP                                               | 10.80 (2.70)     | GAMMA  | Assumption SE=mean/4 |
| <i>Physician Visits - Maintenance therapy</i>    |                  |        |                      |
| Rheumatologist (annually)                        | 3.50 (0.875)     | GAMMA  | Assumption SE=mean/4 |
| Dermatologist (annually)                         | 2.00 (0.50)      | GAMMA  | Assumption SE=mean/4 |
| GP (annually)                                    | 10.80 (2.70)     | GAMMA  | Assumption SE=mean/4 |
| <i>Monitoring - Induction period</i>             |                  |        |                      |
| Number of FBC                                    | 4.50 (1.125)     | GAMMA  | Assumption SE=mean/4 |
| Number of LFT                                    | 0.00 (0.000)     | GAMMA  | Assumption SE=mean/4 |
| Number of ESR                                    | 4.50 (1.125)     | GAMMA  | Assumption SE=mean/4 |
| Number of U&E                                    | 0.00 (0.000)     | GAMMA  | Assumption SE=mean/4 |
| Number of X-Ray                                  | 1.00 (0.250)     | GAMMA  | Assumption SE=mean/4 |

|                                                      |              |       |                      |
|------------------------------------------------------|--------------|-------|----------------------|
| Number of TB test                                    | 1.00 (0.250) | GAMMA | Assumption SE=mean/4 |
| Number of ANA                                        | 4.50 (1.125) | GAMMA | Assumption SE=mean/4 |
| Number of dsDNA tests                                | 0.00 (0.000) | GAMMA | Assumption SE=mean/4 |
| <i>Monitoring - Maintenance therapy</i>              |              |       |                      |
| Number of FBC                                        | 3.00 (0.750) | GAMMA | Assumption SE=mean/4 |
| Number of LFT                                        | 0.00 (0.000) | GAMMA | Assumption SE=mean/4 |
| Number of ESR                                        | 3.00 (0.750) | GAMMA | Assumption SE=mean/4 |
| Number of U&E                                        | 0.00 (0.000) | GAMMA | Assumption SE=mean/4 |
| Number of X-Ray                                      | 0.00 (0.000) | GAMMA | Assumption SE=mean/4 |
| Number of TB test                                    | 1.00 (0.250) | GAMMA | Assumption SE=mean/4 |
| Number of ANA                                        | 3.00 (0.750) | GAMMA | Assumption SE=mean/4 |
| Number of dsANA tests                                | 0.00 (0.000) | GAMMA | Assumption SE=mean/4 |
| <i>AEs</i>                                           |              |       |                      |
| Rate NMSC/patient year                               | 0.00 (0.000) | BETA  | Assumption SE=mean/4 |
| Rate of malignancies/patient year                    | 0.00 (0.000) | BETA  | Assumption SE=mean/4 |
| Rate of severe infections/patient year               | 0.02 (0.004) | BETA  | Assumption SE=mean/4 |
| <i>Treatment specific costs - Secukinumab 300 mg</i> |              |       |                      |
| PsARC                                                | 54.10%       | CODA  |                      |
| PsARC and PASI75                                     | 40.50%       | CODA  |                      |
| PsARC and PASI90                                     | 26.50%       | CODA  |                      |
| PsARC and PASI 100                                   | 15.82%       | CODA  |                      |
| HAQ reduction responders                             | 0.561        | CODA  |                      |
| HAQ reduction non-responders                         | 0.139        | CODA  |                      |
| PASI50 response                                      | 77.30%       | CODA  |                      |
| PASI75 response                                      | 56.60%       | CODA  |                      |
| PASI90 response                                      | 36.80%       | CODA  |                      |
| PASI100 response                                     | 22.40%       | CODA  |                      |
| <i>Physician Visits - Induction period</i>           |              |       |                      |
| Rheumatologist                                       | 4.50 (1.125) | GAMMA | Assumption SE=mean/4 |
| Dermatologist                                        | 6.00 (1.50)  | GAMMA | Assumption SE=mean/4 |
| GP                                                   | 10.80 (2.70) | GAMMA | Assumption SE=mean/4 |
| <i>Physician Visits - Maintenance therapy</i>        |              |       |                      |
| Rheumatologist                                       | 3.50 (0.875) | GAMMA | Assumption SE=mean/4 |
| Dermatologist (annually)                             | 6.50 (1.625) | GAMMA | Assumption SE=mean/4 |
| GP (annually)                                        | 10.80 (2.70) | GAMMA | Assumption SE=mean/4 |
| <i>Monitoring - Induction period</i>                 |              |       |                      |
| Number of FBC                                        | 4.50 (1.125) | GAMMA | Assumption SE=mean/4 |
| Number of LFT                                        | 0.00 (0.000) | GAMMA | Assumption SE=mean/4 |
| Number of ESR                                        | 4.50 (1.125) | GAMMA | Assumption SE=mean/4 |
| Number of U&E                                        | 0.00 (0.000) | GAMMA | Assumption SE=mean/4 |
| Number of X-Ray                                      | 1.00 (0.250) | GAMMA | Assumption SE=mean/4 |
| Number of TB test                                    | 1.00 (0.250) | GAMMA | Assumption SE=mean/4 |
| Number of ANA                                        | 4.50 (1.125) | GAMMA | Assumption SE=mean/4 |
| Number of dsANA tests                                | 0.00 (0.000) | GAMMA | Assumption SE=mean/4 |
| <i>Monitoring - Maintenance therapy</i>              |              |       |                      |
| Number of FBC                                        | 3.00 (0.750) | GAMMA | Assumption SE=mean/4 |
| Number of LFT                                        | 0.00 (0.000) | GAMMA | Assumption SE=mean/4 |

|                                        |              |       |                      |
|----------------------------------------|--------------|-------|----------------------|
| Number of ESR                          | 3.00 (0.750) | GAMMA | Assumption SE=mean/4 |
| Number of U&E                          | 0.00 (0.000) | GAMMA | Assumption SE=mean/4 |
| Number of X-Ray                        | 0.00 (0.000) | GAMMA | Assumption SE=mean/4 |
| Number of TB test                      | 1.00 (0.250) | GAMMA | Assumption SE=mean/4 |
| Number of ANA                          | 3.00 (0.750) | GAMMA | Assumption SE=mean/4 |
| Number of dsANA tests                  | 0.00 (0.000) | GAMMA | Assumption SE=mean/4 |
| <i>AEs</i>                             |              |       |                      |
| Rate NMSC/patient year                 | 0.00 (0.000) | BETA  | Assumption SE=mean/4 |
| Rate of malignancies/patient year      | 0.01 (0.001) | BETA  | Assumption SE=mean/4 |
| Rate of severe infections/patient year | 0.02 (0.005) | BETA  | Assumption SE=mean/4 |

AEs, adverse events; ANA, antinuclear antibody; BSC, best supportive care; CODA, convergence diagnostics and output analysis; dsDNA, double-stranded deoxyribonucleic acid; ESR, erythrocyte sedimentation rate; FBC, full blood count; HAQ, Health Assessment Questionnaire; LFT, liver function test; MD, medical doctor; NMSC, nonmelanoma skin cancers; PASI, Psoriasis Area and Severity Index; PASI50, 75, 90, 100,  $\geq 50\%$ ,  $\geq 75\%$ ,  $\geq 90\%$  or 100% reduction from baseline PASI; PsARC, Psoriatic Arthritis Response Criteria; Q4W, every 4 weeks; SE, standard error; TB, tuberculosis; U&E, urea and electrolyte.

CHEERS checklist—Items to include when reporting economic evaluations of health interventions

| Section/item                    | Item No | Recommendation                                                                                                                                                                              | Reported on page No/line No              |
|---------------------------------|---------|---------------------------------------------------------------------------------------------------------------------------------------------------------------------------------------------|------------------------------------------|
| <b>Title and abstract</b>       |         |                                                                                                                                                                                             |                                          |
| Title                           | 1       | Identify the study as an economic evaluation or use more specific terms such as “cost-effectiveness analysis”, and describe the interventions compared.                                     | Page 1/Lines 1-3                         |
| Abstract                        | 2       | Provide a structured summary of objectives, perspective, setting, methods (including study design and inputs), results (including base case and uncertainty analyses), and conclusions.     | Pages 2-3/Lines 33-58                    |
| <b>Introduction</b>             |         |                                                                                                                                                                                             |                                          |
| Background and objectives       | 3       | Provide an explicit statement of the broader context for the study.                                                                                                                         | Page 5/Lines 75-97                       |
|                                 |         | Present the study question and its relevance for health policy or practice decisions.                                                                                                       | Pages 5-6/Lines 98-106                   |
| <b>Methods</b>                  |         |                                                                                                                                                                                             |                                          |
| Target population and subgroups | 4       | Describe characteristics of the base case population and subgroups analysed, including why they were chosen.                                                                                | Page 6/Lines 109-111                     |
| Setting and location            | 5       | State relevant aspects of the system(s) in which the decision(s) need(s) to be made.                                                                                                        | Page 6/Lines 109-121                     |
| Study perspective               | 6       | Describe the perspective of the study and relate this to the costs being evaluated.                                                                                                         | Page 9 /Line 182-184                     |
| Comparators                     | 7       | Describe the interventions or strategies being compared and state why they were chosen.                                                                                                     | Pages 5-6/Lines 98-106                   |
| Time horizon                    | 8       | State the time horizon(s) over which costs and consequences are being evaluated and say why appropriate.                                                                                    | Page 6 /Lines 115-117                    |
| Discount rate                   | 9       | Report the choice of discount rate(s) used for costs and outcomes and say why appropriate.                                                                                                  | Page 9/Lines 200-201<br>Page 10/Line 207 |
| Choice of health outcomes       | 10      | Describe what outcomes were used as the measure(s) of benefit in the evaluation and their relevance for the type of analysis performed.                                                     | Page 8/Lines 152-180                     |
| Measurement of effectiveness    | 11a     | <i>Single study-based estimates</i> : Describe fully the design features of the single effectiveness study and why the single study was a sufficient source of clinical effectiveness data. | N/A                                      |
|                                 | 11b     | <i>Synthesis-based estimates</i> : Describe fully the methods used for identification of included studies and synthesis of clinical effectiveness data.                                     | N/A                                      |
| Measurement and valuation       | 12      | If applicable, describe the population and methods used to elicit preferences for outcomes.                                                                                                 | N/A                                      |



| Section/item                         | Item No | Recommendation                                                                                                                                                                                                                                                                                                                                        | Reported on page No/line No                                           |
|--------------------------------------|---------|-------------------------------------------------------------------------------------------------------------------------------------------------------------------------------------------------------------------------------------------------------------------------------------------------------------------------------------------------------|-----------------------------------------------------------------------|
| of preference based outcomes         |         |                                                                                                                                                                                                                                                                                                                                                       |                                                                       |
| Estimating resources and costs       | 13a     | <i>Single study-based economic evaluation:</i> Describe approaches used to estimate resource use associated with the alternative interventions. Describe primary or secondary research methods for valuing each resource item in terms of its unit cost. Describe any adjustments made to approximate to opportunity costs.                           | N/A                                                                   |
|                                      | 13b     | <i>Model-based economic evaluation:</i> Describe approaches and data sources used to estimate resource use associated with model health states. Describe primary or secondary research methods for valuing each resource item in terms of its unit cost. Describe any adjustments made to approximate to opportunity costs.                           | Page 9/Lines 182-200                                                  |
| Currency, price date, and conversion | 14      | Report the dates of the estimated resource quantities and unit costs. Describe methods for adjusting estimated unit costs to the year of reported costs if necessary. Describe methods for converting costs into a common currency base and the exchange rate.                                                                                        | Page 9/Lines 182-200<br>Table 2                                       |
| Choice of model                      | 15      | Describe and give reasons for the specific type of decision-analytical model used. Providing a figure to show model structure is strongly recommended.                                                                                                                                                                                                | Page 6/Lines 115-123<br>Figure 1                                      |
| Assumptions                          | 16      | Describe all structural or other assumptions underpinning the decision-analytical model.                                                                                                                                                                                                                                                              | Page 6/Lines 112-113<br>Page 7/ Lines 141-148<br>Page 8/Lines 156-172 |
| Analytical methods                   | 17      | Describe all analytical methods supporting the evaluation. This could include methods for dealing with skewed, missing, or censored data; extrapolation methods; methods for pooling data; approaches to validate or make adjustments (such as half cycle corrections) to a model; and methods for handling population heterogeneity and uncertainty. | Pages 9-10/Lines 202-220                                              |
| <b>Results</b>                       |         |                                                                                                                                                                                                                                                                                                                                                       |                                                                       |
| Study parameters                     | 18      | Report the values, ranges, references, and, if used, probability distributions for all parameters. Report reasons or sources for distributions used to represent uncertainty where appropriate. Providing a table to show the input values is strongly recommended.                                                                                   | Table 1<br>Supplementary Table 1                                      |

| Section/item                                                         | Item No | Recommendation                                                                                                                                                                                                                                                              | Reported on page No/line No              |
|----------------------------------------------------------------------|---------|-----------------------------------------------------------------------------------------------------------------------------------------------------------------------------------------------------------------------------------------------------------------------------|------------------------------------------|
| Incremental costs and outcomes                                       | 19      | For each intervention, report mean values for the main categories of estimated costs and outcomes of interest, as well as mean differences between the comparator groups. If applicable, report incremental cost-effectiveness ratios.                                      | Page 10/Lines 222-227<br>Table 3         |
| Characterising uncertainty                                           | 20a     | <i>Single study-based economic evaluation:</i> Describe the effects of sampling uncertainty for the estimated incremental cost and incremental effectiveness parameters, together with the impact of methodological assumptions (such as discount rate, study perspective). | N/A                                      |
|                                                                      | 20b     | <i>Model-based economic evaluation:</i> Describe the effects on the results of uncertainty for all input parameters, and uncertainty related to the structure of the model and assumptions.                                                                                 | Pages 10-11/Lines 228-241<br>Figures 4-6 |
| Characterising heterogeneity                                         | 21      | If applicable, report differences in costs, outcomes, or cost-effectiveness that can be explained by variations between subgroups of patients with different baseline characteristics or other observed variability in effects that are not reducible by more information.  | N/A                                      |
| <b>Discussion</b>                                                    |         |                                                                                                                                                                                                                                                                             |                                          |
| Study findings, limitations, generalisability, and current knowledge | 22      | Summarise key study findings and describe how they support the conclusions reached. Discuss limitations and the generalisability of the findings and how the findings fit with current knowledge.                                                                           | Pages 11-12/<br>Lines 243-274            |
| <b>Other</b>                                                         |         |                                                                                                                                                                                                                                                                             |                                          |
| Source of funding                                                    | 23      | Describe how the study was funded and the role of the funder in the identification, design, conduct, and reporting of the analysis. Describe other non-monetary sources of support.                                                                                         | Page 14/Line 288                         |
| Conflicts of interest                                                | 24      | Describe any potential for conflict of interest of study contributors in accordance with journal policy. In the absence of a journal policy, we recommend authors comply with International Committee of Medical Journal Editors recommendations.                           | Page 14/Lines 290-292                    |

For consistency, the CHEERS statement checklist format is based on the format of the CONSORT statement checklist
