# Supplementary material for: Cost-effectiveness analysis of ixekizumab versus secukinumab in patients with psoriatic arthritis and concomitant moderate-to-severe psoriasis in Spain
Source: PubMed Central journal article supplement — BMJ Open. 2020 Aug 13;10(8):e032552. doi: 10.1136/bmjopen-2019-032552 (PMC7430486; doi:10.1136/bmjopen-2019-032552), 2020-08-13
Supplement: bmjopen-2019-032552supp001.pdf [file bmjopen-2019-032552supp001.pdf]

## BMJ Open

**Cost-effectiveness analysis of ixekizumab versus secukinumab in patients with psoriatic arthritis and concomitant moderate-to-severe psoriasis in Spain**

Bernd Schweikert, Chiara Malmberg, Mercedes Nuñez, Tatiana Dilla, Christophe Sapin, Susanne Hartz

**Corresponding Author:** Dr. Bernd Schweikert

ICON plc, Konrad-Zuse-Platz 11, 81829 Munich, Germany

bernd.schweikert@iconplc.com

**Supplementary Table 1.** Efficacy input data used in the base-case analysis based on data from a related network meta-analysis. [23, 24]

| Treatment     | Probability of response for chosen criterion |                    | HAQ reduction |                | PASI response      |                    |                    | PASI reduction |                |
|---------------|----------------------------------------------|--------------------|---------------|----------------|--------------------|--------------------|--------------------|----------------|----------------|
|               | PsARC                                        | PsARC and PASI90   | Responders    | Non-responders | PASI75             | PASI90             | PASI100            | Responders     | Non-responders |
| Ixe 80 mg Q4W | 53.0%                                        | 34.4%              | 0.51          | 0.05           | 70.9%              | 52.0%              | 35.4%              | 18.36          | 9.49           |
| Sec 300 mg    | 54.1% <sup>a</sup>                           | 26.5% <sup>a</sup> | 0.56          | 0.14           | 56.6% <sup>a</sup> | 36.8% <sup>a</sup> | 22.4% <sup>a</sup> | 18.36          | 8.13           |

<sup>a</sup>Data derived from a mixed population of bDMARD-naïve and -experienced patients (due to lack of data reported specifically for bDMARD-naïve patients).

DMARD, biologic disease-modifying anti-rheumatic drug; HAQ, Health Assessment Questionnaire; Ixe, ixekizumab, PASI, Psoriasis Area and Severity Index; PASI75, 90, 100, ≥75%, ≥90% or 100% reduction from baseline PASI; PsARC, Psoriatic Arthritis Response Criteria; Q4W, every 4 weeks; Sec, secukinumab.
