# Supplementary material for: Cost-effectiveness analysis of ixekizumab versus secukinumab in patients with psoriatic arthritis and concomitant moderate-to-severe psoriasis in Spain
Source: PubMed Central journal article supplement — BMJ Open. 2020 Aug 13;10(8):e032552. doi: 10.1136/bmjopen-2019-032552 (PMC7430486; doi:10.1136/bmjopen-2019-032552), 2020-08-13
Supplement: bmjopen-2019-032552supp002.pdf [file bmjopen-2019-032552supp002.pdf]

**BMJ Open****Cost-effectiveness analysis of ixekizumab versus secukinumab in patients with psoriatic arthritis and concomitant moderate-to-severe psoriasis in Spain**

Bernd Schweikert, Chiara Malmberg, Mercedes Nuñez, Tatiana Dilla, Christophe Sapin, Susanne Hartz

**Corresponding Author:** Dr. Bernd Schweikert

ICON plc, Konrad-Zuse-Platz 11, 81829 Munich, Germany

bernd.schweikert@iconplc.com

**Supplementary Table 2.** Parameters used in the probabilistic sensitivity analysis

| Parameter                             | Mean (SE)         | Distribution type | CI/assumptions         |
|---------------------------------------|-------------------|-------------------|------------------------|
| <i>Utility regression calculation</i> |                   |                   |                        |
| Intercept                             | 0.903 (0.009)     | BETA              |                        |
| HAQ                                   | -0.219 (0.010)    | NORMAL            |                        |
| PASI                                  | -0.001 (0.002)    | NORMAL            |                        |
| Annual HAQ progression                | 0.072 (0.018)     | GAMMA             | Assumption SE=mean/4   |
| Annual discontinuation rate           | 0.165 (0.041)     | BETA              | Assumption SE=mean/4   |
| Mean weight                           | 87.02 (0.454)     | NORMAL            | Based on SPIRIT trials |
| Additional annual cost of BSC         | 0.00 (0.000)      | GAMMA             | Assumption SE=mean/4   |
| <i>Monitoring Costs</i>               |                   |                   |                        |
| Cost of full blood count              | 67.98 (17.0)      | GAMMA             | Assumption SE=mean/4   |
| Cost of liver function test           | 5.9566 (1.5)      | GAMMA             | Assumption SE=mean/4   |
| Cost of ESR                           | 1.03 (0.3)        | GAMMA             | Assumption SE=mean/4   |
| Cost of urea and electrolytes test    | 75.8183 (19.0)    | GAMMA             | Assumption SE=mean/4   |
| Cost of X-Ray                         | 42.23 (10.6)      | GAMMA             | Assumption SE=mean/4   |
| Cost of TB test                       | 8.95 (2.2)        | GAMMA             | Assumption SE=mean/4   |
| Cost of ANA test                      | 8.9507 (2.2)      | GAMMA             | Assumption SE=mean/4   |
| Cost of dsDNA test                    | 0 (0.0)           | GAMMA             | Assumption SE=mean/4   |
| <i>Admin costs</i>                    |                   |                   |                        |
| Cost of subcutaneous injection        | 1.11 (0.3)        | GAMMA             | Assumption SE=mean/4   |
| Cost of intravenous infusion          | 81.82 (20.5)      | GAMMA             | Assumption SE=mean/4   |
| <i>Physician costs</i>                |                   |                   |                        |
| Cost of rheumatologist visit          | 220.62 (55.2)     | GAMMA             | Assumption SE=mean/4   |
| Cost of dermatologist visit           | 100.58 (25.1)     | GAMMA             | Assumption SE=mean/4   |
| Cost of GP visit                      | 33.86 (8.5)       | GAMMA             | Assumption SE=mean/4   |
| <i>AEs hospital costs</i>             |                   |                   |                        |
| NMSC                                  | 3858.07 (964.5)   | GAMMA             | Assumption SE=mean/4   |
| Lymphoma                              | 10345.71 (2586.4) | GAMMA             | Assumption SE=mean/4   |
| Melanoma                              | 3966.44 (991.6)   | GAMMA             | Assumption SE=mean/4   |
| Sepsis                                | 7769.76 (1942.4)  | GAMMA             | Assumption SE=mean/4   |

|                                                  |                  |        |                      |
|--------------------------------------------------|------------------|--------|----------------------|
| TB                                               | 7110.13 (1777.5) | GAMMA  | Assumption SE=mean/4 |
| Pneumonia                                        | 4558.02 (1139.5) | GAMMA  | Assumption SE=mean/4 |
| Skin and soft tissue infection                   | 4171.03 (1042.8) | GAMMA  | Assumption SE=mean/4 |
| one and joint infection                          | 7245.83 (1811.5) | GAMMA  | Assumption SE=mean/4 |
| Urinary tract infection                          | 3347.43 (836.9)  | GAMMA  | Assumption SE=mean/4 |
| <i>Health state costs</i>                        |                  |        |                      |
| Kobelt HAQ regression constant                   | 636.56 (410.7)   | NORMAL | Kobelt               |
| Kobelt HAQ regression intercept                  | 2101.70 (739.7)  | NORMAL | Kobelt               |
| Corbett PASI cost uncontrolled psoriasis         | 2871.95 (718.0)  | GAMMA  | Assumption SE=mean/4 |
| Corbett PASI cost controlled psoriasis           | 81.03 (2.03)     | GAMMA  | Assumption SE=mean/4 |
| Kobelt cost adjustment factor                    | 0.85 (0.2)       | BETA   | Assumption SE=mean/4 |
| <i>Efficacy of BSC</i>                           |                  |        |                      |
| PsARC                                            | 30.60%           | CODA   |                      |
| PsARC and PASI75                                 | 5.04%            | CODA   |                      |
| PsARC and PASI90                                 | 1.77%            | CODA   |                      |
| PsARC and PASI100                                | 0.61%            | CODA   |                      |
| HAQ reduction responders                         | 0.257            | CODA   |                      |
| HAQ reduction non-responders                     | -0.009           | CODA   |                      |
| PASI50 response                                  | 17.40%           | CODA   |                      |
| PASI75 response                                  | 6.40%            | CODA   |                      |
| PASI90 response                                  | 2.20%            | CODA   |                      |
| PASI100 response                                 | 0.70%            | CODA   |                      |
| <i>Treatment specific costs - Ixekizumab Q4W</i> |                  |        |                      |
| PsARC                                            | 53.00%           | CODA   |                      |
| PsARC and PASI75                                 | 46.65%           | CODA   |                      |
| PsARC and PASI90                                 | 34.40%           | CODA   |                      |
| PsARC and PASI 100                               | 23.01%           | CODA   |                      |
| HAQ reduction responders                         | 0.506            | CODA   |                      |
| HAQ reduction non-responders                     | 0.052            | CODA   |                      |
| PASI50 response                                  | 87.20%           | CODA   |                      |
| PASI75 response                                  | 70.90%           | CODA   |                      |
| PASI90 response                                  | 52.00%           | CODA   |                      |
| PASI100 response                                 | 35.40%           | CODA   |                      |
| <i>Physician Visits - Induction period</i>       |                  |        |                      |
| Rheumatologist                                   | 4.50 (1.125)     | GAMMA  | Assumption SE=mean/4 |
| Dermatologist                                    | 6.00 (1.50)      | GAMMA  | Assumption SE=mean/4 |
| GP                                               | 10.80 (2.70)     | GAMMA  | Assumption SE=mean/4 |
| <i>Physician Visits - Maintenance therapy</i>    |                  |        |                      |
| Rheumatologist (annually)                        | 3.50 (0.875)     | GAMMA  | Assumption SE=mean/4 |
| Dermatologist (annually)                         | 2.00 (0.50)      | GAMMA  | Assumption SE=mean/4 |
| GP (annually)                                    | 10.80 (2.70)     | GAMMA  | Assumption SE=mean/4 |
| <i>Monitoring - Induction period</i>             |                  |        |                      |
| Number of FBC                                    | 4.50 (1.125)     | GAMMA  | Assumption SE=mean/4 |
| Number of LFT                                    | 0.00 (0.000)     | GAMMA  | Assumption SE=mean/4 |
| Number of ESR                                    | 4.50 (1.125)     | GAMMA  | Assumption SE=mean/4 |
| Number of U&E                                    | 0.00 (0.000)     | GAMMA  | Assumption SE=mean/4 |
| Number of X-Ray                                  | 1.00 (0.250)     | GAMMA  | Assumption SE=mean/4 |

|                                                      |              |       |                      |
|------------------------------------------------------|--------------|-------|----------------------|
| Number of TB test                                    | 1.00 (0.250) | GAMMA | Assumption SE=mean/4 |
| Number of ANA                                        | 4.50 (1.125) | GAMMA | Assumption SE=mean/4 |
| Number of dsDNA tests                                | 0.00 (0.000) | GAMMA | Assumption SE=mean/4 |
| <i>Monitoring - Maintenance therapy</i>              |              |       |                      |
| Number of FBC                                        | 3.00 (0.750) | GAMMA | Assumption SE=mean/4 |
| Number of LFT                                        | 0.00 (0.000) | GAMMA | Assumption SE=mean/4 |
| Number of ESR                                        | 3.00 (0.750) | GAMMA | Assumption SE=mean/4 |
| Number of U&E                                        | 0.00 (0.000) | GAMMA | Assumption SE=mean/4 |
| Number of X-Ray                                      | 0.00 (0.000) | GAMMA | Assumption SE=mean/4 |
| Number of TB test                                    | 1.00 (0.250) | GAMMA | Assumption SE=mean/4 |
| Number of ANA                                        | 3.00 (0.750) | GAMMA | Assumption SE=mean/4 |
| Number of dsANA tests                                | 0.00 (0.000) | GAMMA | Assumption SE=mean/4 |
| <i>AEs</i>                                           |              |       |                      |
| Rate NMSC/patient year                               | 0.00 (0.000) | BETA  | Assumption SE=mean/4 |
| Rate of malignancies/patient year                    | 0.00 (0.000) | BETA  | Assumption SE=mean/4 |
| Rate of severe infections/patient year               | 0.02 (0.004) | BETA  | Assumption SE=mean/4 |
| <i>Treatment specific costs - Secukinumab 300 mg</i> |              |       |                      |
| PsARC                                                | 54.10%       | CODA  |                      |
| PsARC and PASI75                                     | 40.50%       | CODA  |                      |
| PsARC and PASI90                                     | 26.50%       | CODA  |                      |
| PsARC and PASI 100                                   | 15.82%       | CODA  |                      |
| HAQ reduction responders                             | 0.561        | CODA  |                      |
| HAQ reduction non-responders                         | 0.139        | CODA  |                      |
| PASI50 response                                      | 77.30%       | CODA  |                      |
| PASI75 response                                      | 56.60%       | CODA  |                      |
| PASI90 response                                      | 36.80%       | CODA  |                      |
| PASI100 response                                     | 22.40%       | CODA  |                      |
| <i>Physician Visits - Induction period</i>           |              |       |                      |
| Rheumatologist                                       | 4.50 (1.125) | GAMMA | Assumption SE=mean/4 |
| Dermatologist                                        | 6.00 (1.50)  | GAMMA | Assumption SE=mean/4 |
| GP                                                   | 10.80 (2.70) | GAMMA | Assumption SE=mean/4 |
| <i>Physician Visits - Maintenance therapy</i>        |              |       |                      |
| Rheumatologist                                       | 3.50 (0.875) | GAMMA | Assumption SE=mean/4 |
| Dermatologist (annually)                             | 6.50 (1.625) | GAMMA | Assumption SE=mean/4 |
| GP (annually)                                        | 10.80 (2.70) | GAMMA | Assumption SE=mean/4 |
| <i>Monitoring - Induction period</i>                 |              |       |                      |
| Number of FBC                                        | 4.50 (1.125) | GAMMA | Assumption SE=mean/4 |
| Number of LFT                                        | 0.00 (0.000) | GAMMA | Assumption SE=mean/4 |
| Number of ESR                                        | 4.50 (1.125) | GAMMA | Assumption SE=mean/4 |
| Number of U&E                                        | 0.00 (0.000) | GAMMA | Assumption SE=mean/4 |
| Number of X-Ray                                      | 1.00 (0.250) | GAMMA | Assumption SE=mean/4 |
| Number of TB test                                    | 1.00 (0.250) | GAMMA | Assumption SE=mean/4 |
| Number of ANA                                        | 4.50 (1.125) | GAMMA | Assumption SE=mean/4 |
| Number of dsANA tests                                | 0.00 (0.000) | GAMMA | Assumption SE=mean/4 |
| <i>Monitoring - Maintenance therapy</i>              |              |       |                      |
| Number of FBC                                        | 3.00 (0.750) | GAMMA | Assumption SE=mean/4 |
| Number of LFT                                        | 0.00 (0.000) | GAMMA | Assumption SE=mean/4 |

|                                        |              |       |                      |
|----------------------------------------|--------------|-------|----------------------|
| Number of ESR                          | 3.00 (0.750) | GAMMA | Assumption SE=mean/4 |
| Number of U&E                          | 0.00 (0.000) | GAMMA | Assumption SE=mean/4 |
| Number of X-Ray                        | 0.00 (0.000) | GAMMA | Assumption SE=mean/4 |
| Number of TB test                      | 1.00 (0.250) | GAMMA | Assumption SE=mean/4 |
| Number of ANA                          | 3.00 (0.750) | GAMMA | Assumption SE=mean/4 |
| Number of dsANA tests                  | 0.00 (0.000) | GAMMA | Assumption SE=mean/4 |
| <i>AEs</i>                             |              |       |                      |
| Rate NMSC/patient year                 | 0.00 (0.000) | BETA  | Assumption SE=mean/4 |
| Rate of malignancies/patient year      | 0.01 (0.001) | BETA  | Assumption SE=mean/4 |
| Rate of severe infections/patient year | 0.02 (0.005) | BETA  | Assumption SE=mean/4 |

AEs, adverse events; ANA, antinuclear antibody; BSC, best supportive care; CODA, convergence diagnostics and output analysis; dsDNA, double-stranded deoxyribonucleic acid; ESR, erythrocyte sedimentation rate; FBC, full blood count; HAQ, Health Assessment Questionnaire; LFT, liver function test; MD, medical doctor; NMSC, nonmelanoma skin cancers; PASI, Psoriasis Area and Severity Index; PASI50, 75, 90, 100,  $\geq 50\%$ ,  $\geq 75\%$ ,  $\geq 90\%$  or 100% reduction from baseline PASI; PsARC, Psoriatic Arthritis Response Criteria; Q4W, every 4 weeks; SE, standard error; TB, tuberculosis; U&E, urea and electrolyte.
